# Supplementary material
Source: publisher site journal article supplement (https://www.spandidos-publications.com/2898/downloadSupplementary)
Supplement: Supplementary file 1 [file downloadSupplementary]

## Sheet: Table SI
Table SI. Total proteins in EC and AP tissues.
UniProt ID	Gene name	P-value EC_AP	GOTERM_BP_DIRECT	GOTERM_CC_DIRECT	GOTERM_MF_DIRECT	KEGG_PATHWAY
P61158	ACTR3	0.000131493	GO:0006928~movement of cell or subcellular component,GO:0007163~establishment or maintenance of cell polarity,GO:0008356~asymmetric cell division,GO:0016344~meiotic chromosome movement towards spindle pole,GO:0033206~meiotic cytokinesis,GO:0034314~Arp2/3 complex-mediated actin nucleation,GO:0038096~Fc-gamma receptor signaling pathway involved in phagocytosis,GO:0048013~ephrin receptor signaling p…	GO:0005829~cytosol,GO:0005885~Arp2/3 protein complex,GO:0005903~brush border,GO:0005911~cell-cell junction,GO:0005925~focal adhesion,GO:0015629~actin cytoskeleton,GO:0016020~membrane,GO:0030027~lamellipodium,GO:0070062~extracellular exosome,	GO:0005200~structural constituent of cytoskeleton,GO:0005515~protein binding,GO:0005524~ATP binding,GO:0051015~actin filament binding,
A6PVM9	AIF1L	0.0235754		GO:0005737~cytoplasm,GO:0005884~actin filament,GO:0005925~focal adhesion,GO:0015629~actin cytoskeleton,GO:0032587~ruffle membrane,GO:0043234~protein complex,GO:0070062~extracellular exosome,	GO:0005509~calcium ion binding,GO:0051015~actin filament binding,
F5GXJ9	ALCAM	0.00314117	GO:0002250~adaptive immune response,GO:0007155~cell adhesion,GO:0007157~heterophilic cell-cell adhesion via plasma membrane cell adhesion molecules,GO:0007165~signal transduction,GO:0008045~motor neuron axon guidance,GO:0031290~retinal ganglion cell axon guidance,GO:0048846~axon extension involved in axon guidance,GO:1990138~neuron projection extension,	GO:0001772~immunological synapse,GO:0005887~integral component of plasma membrane,GO:0005925~focal adhesion,GO:0009897~external side of plasma membrane,GO:0016021~integral component of membrane,GO:0030424~axon,GO:0030425~dendrite,GO:0031226~intrinsic component of plasma membrane,GO:0042101~T cell receptor complex,GO:0043025~neuronal cell body,GO:0070062~extracellular exosome,	GO:0005102~receptor binding,GO:0005515~protein binding,	hsa04514:Cell adhesion molecules (CAMs),
Q12955	ANK3	0.13109	GO:0000281~mitotic cytokinesis,GO:0006888~ER to Golgi vesicle-mediated transport,GO:0007009~plasma membrane organization,GO:0007016~cytoskeletal anchoring at plasma membrane,GO:0007165~signal transduction,GO:0007409~axonogenesis,GO:0007411~axon guidance,GO:0007528~neuromuscular junction development,GO:0010628~positive regulation of gene expression,GO:0010650~positive regulation of cell communicat…	GO:0005764~lysosome,GO:0005783~endoplasmic reticulum,GO:0005794~Golgi apparatus,GO:0005829~cytosol,GO:0005886~plasma membrane,GO:0005923~bicellular tight junction,GO:0009925~basal plasma membrane,GO:0009986~cell surface,GO:0014704~intercalated disc,GO:0014731~spectrin-associated cytoskeleton,GO:0016323~basolateral plasma membrane,GO:0016328~lateral plasma membrane,GO:0016529~sarcoplasmic reticulu…	GO:0005200~structural constituent of cytoskeleton,GO:0005515~protein binding,GO:0008092~cytoskeletal protein binding,GO:0008093~cytoskeletal adaptor activity,GO:0030507~spectrin binding,GO:0030674~protein binding, bridging,GO:0044325~ion channel binding,GO:0045296~cadherin binding,	hsa05205:Proteoglycans in cancer,
P08758	ANXA5	0.00289138	GO:0007165~signal transduction,GO:0007596~blood coagulation,GO:0010033~response to organic substance,GO:0043066~negative regulation of apoptotic process,GO:0043086~negative regulation of catalytic activity,GO:0050819~negative regulation of coagulation,	GO:0005622~intracellular,GO:0005737~cytoplasm,GO:0005925~focal adhesion,GO:0009897~external side of plasma membrane,GO:0016020~membrane,GO:0070062~extracellular exosome,GO:0072563~endothelial microparticle,	GO:0004859~phospholipase inhibitor activity,GO:0005509~calcium ion binding,GO:0005515~protein binding,GO:0005543~phospholipid binding,GO:0005544~calcium-dependent phospholipid binding,
Q16853	AOC3	4.66137e-06	GO:0006805~xenobiotic metabolic process,GO:0006954~inflammatory response,GO:0007155~cell adhesion,GO:0009308~amine metabolic process,GO:0046677~response to antibiotic,GO:0055114~oxidation-reduction process,	GO:0005737~cytoplasm,GO:0005769~early endosome,GO:0005783~endoplasmic reticulum,GO:0005794~Golgi apparatus,GO:0005886~plasma membrane,GO:0005902~microvillus,GO:0009986~cell surface,GO:0016021~integral component of membrane,	GO:0005507~copper ion binding,GO:0005509~calcium ion binding,GO:0005515~protein binding,GO:0008131~primary amine oxidase activity,GO:0042803~protein homodimerization activity,GO:0046982~protein heterodimerization activity,GO:0048038~quinone binding,GO:0052593~tryptamine:oxygen oxidoreductase (deaminating) activity,GO:0052594~aminoacetone:oxygen oxidoreductase(deaminating) activity,GO:0052595~alip…	hsa00260:Glycine, serine and threonine metabolism,hsa00350:Tyrosine metabolism,hsa00360:Phenylalanine metabolism,hsa00410:beta-Alanine metabolism,hsa01100:Metabolic pathways,
Q9HDC9	APMAP	0.078813	GO:0009058~biosynthetic process,	GO:0005783~endoplasmic reticulum,GO:0009986~cell surface,GO:0016020~membrane,GO:0016021~integral component of membrane,GO:0070062~extracellular exosome,	GO:0004064~arylesterase activity,GO:0016844~strictosidine synthase activity,
C9IZD3	ARHGAP17	0.0995878	GO:0007165~signal transduction,GO:0043547~positive regulation of GTPase activity,GO:0051056~regulation of small GTPase mediated signal transduction,	GO:0005737~cytoplasm,GO:0005829~cytosol,GO:0005886~plasma membrane,GO:0005923~bicellular tight junction,	GO:0005096~GTPase activator activity,GO:0005515~protein binding,GO:0017124~SH3 domain binding,
P52565	ARHGDIA	0.000371077	GO:0006928~movement of cell or subcellular component,GO:0007162~negative regulation of cell adhesion,GO:0007266~Rho protein signal transduction,GO:0008360~regulation of cell shape,GO:0030336~negative regulation of cell migration,GO:0032880~regulation of protein localization,GO:0035023~regulation of Rho protein signal transduction,GO:0043066~negative regulation of apoptotic process,GO:0043547~posi…	GO:0001772~immunological synapse,GO:0005615~extracellular space,GO:0005634~nucleus,GO:0005737~cytoplasm,GO:0005829~cytosol,GO:0005856~cytoskeleton,GO:0070062~extracellular exosome,	GO:0005094~Rho GDP-dissociation inhibitor activity,GO:0005096~GTPase activator activity,GO:0005504~fatty acid binding,GO:0005515~protein binding,	hsa04722:Neurotrophin signaling pathway,hsa04962:Vasopressin-regulated water reabsorption,
Q92974	ARHGEF2	0.000507615	GO:0000132~establishment of mitotic spindle orientation,GO:0000902~cell morphogenesis,GO:0006886~intracellular protein transport,GO:0007015~actin filament organization,GO:0007026~negative regulation of microtubule depolymerization,GO:0007067~mitotic nuclear division,GO:0032755~positive regulation of interleukin-6 production,GO:0032760~positive regulation of tumor necrosis factor production,GO:003…	GO:0005622~intracellular,GO:0005737~cytoplasm,GO:0005794~Golgi apparatus,GO:0005819~spindle,GO:0005829~cytosol,GO:0005856~cytoskeleton,GO:0005874~microtubule,GO:0005923~bicellular tight junction,GO:0005925~focal adhesion,GO:0014069~postsynaptic density,GO:0016023~cytoplasmic, membrane-bounded vesicle,GO:0031410~cytoplasmic vesicle,GO:0031982~vesicle,GO:0032587~ruffle membrane,GO:0043025~neuronal …	GO:0005085~guanyl-nucleotide exchange factor activity,GO:0005089~Rho guanyl-nucleotide exchange factor activity,GO:0005515~protein binding,GO:0008017~microtubule binding,GO:0008134~transcription factor binding,GO:0008270~zinc ion binding,GO:0017048~Rho GTPase binding,GO:0030676~Rac guanyl-nucleotide exchange factor activity,GO:0046872~metal ion binding,GO:0048365~Rac GTPase binding,	hsa05130:Pathogenic Escherichia coli infection,
E9PDQ5	ARHGEF7	0.247854	GO:0002244~hematopoietic progenitor cell differentiation,GO:0007030~Golgi organization,GO:0007165~signal transduction,GO:0007399~nervous system development,GO:0010763~positive regulation of fibroblast migration,GO:0030032~lamellipodium assembly,GO:0032092~positive regulation of protein binding,GO:0035023~regulation of Rho protein signal transduction,GO:0035556~intracellular signal transduction,GO…	GO:0000322~storage vacuole,GO:0001726~ruffle,GO:0005622~intracellular,GO:0005829~cytosol,GO:0005886~plasma membrane,GO:0005925~focal adhesion,GO:0005938~cell cortex,GO:0030027~lamellipodium,GO:0043005~neuron projection,GO:0043025~neuronal cell body,GO:0043234~protein complex,	GO:0005085~guanyl-nucleotide exchange factor activity,GO:0005089~Rho guanyl-nucleotide exchange factor activity,GO:0005515~protein binding,GO:0019901~protein kinase binding,	hsa04810:Regulation of actin cytoskeleton,
O15144	ARPC2	0.0710318	GO:0006928~movement of cell or subcellular component,GO:0010592~positive regulation of lamellipodium assembly,GO:0034314~Arp2/3 complex-mediated actin nucleation,GO:0038096~Fc-gamma receptor signaling pathway involved in phagocytosis,GO:0048013~ephrin receptor signaling pathway,GO:1900026~positive regulation of substrate adhesion-dependent cell spreading,	GO:0005737~cytoplasm,GO:0005768~endosome,GO:0005794~Golgi apparatus,GO:0005829~cytosol,GO:0005885~Arp2/3 protein complex,GO:0005925~focal adhesion,GO:0015629~actin cytoskeleton,GO:0031252~cell leading edge,GO:0036195~muscle cell projection membrane,GO:0043005~neuron projection,GO:0045202~synapse,GO:0070062~extracellular exosome,	GO:0005200~structural constituent of cytoskeleton,GO:0005515~protein binding,GO:0051015~actin filament binding,	hsa04144:Endocytosis,hsa04666:Fc gamma R-mediated phagocytosis,hsa04810:Regulation of actin cytoskeleton,hsa05100:Bacterial invasion of epithelial cells,hsa05130:Pathogenic Escherichia coli infection,hsa05131:Shigellosis,hsa05132:Salmonella infection,
P05023	ATP1A1	1.35344e-05	GO:0002026~regulation of the force of heart contraction,GO:0002028~regulation of sodium ion transport,GO:0006883~cellular sodium ion homeostasis,GO:0008217~regulation of blood pressure,GO:0010107~potassium ion import,GO:0010248~establishment or maintenance of transmembrane electrochemical gradient,GO:0015991~ATP hydrolysis coupled proton transport,GO:0016311~dephosphorylation,GO:0030007~cellular …	GO:0005768~endosome,GO:0005783~endoplasmic reticulum,GO:0005794~Golgi apparatus,GO:0005886~plasma membrane,GO:0005890~sodium:potassium-exchanging ATPase complex,GO:0005901~caveola,GO:0014069~postsynaptic density,GO:0014704~intercalated disc,GO:0016020~membrane,GO:0016021~integral component of membrane,GO:0016323~basolateral plasma membrane,GO:0016324~apical plasma membrane,GO:0030315~T-tubule,GO:…	GO:0000166~nucleotide binding,GO:0005391~sodium:potassium-exchanging ATPase activity,GO:0005515~protein binding,GO:0005524~ATP binding,GO:0016791~phosphatase activity,GO:0019901~protein kinase binding,GO:0019904~protein domain specific binding,GO:0030506~ankyrin binding,GO:0030955~potassium ion binding,GO:0031402~sodium ion binding,GO:0043531~ADP binding,GO:0043548~phosphatidylinositol 3-kinase b…	hsa04022:cGMP-PKG signaling pathway,hsa04024:cAMP signaling pathway,hsa04260:Cardiac muscle contraction,hsa04261:Adrenergic signaling in cardiomyocytes,hsa04911:Insulin secretion,hsa04918:Thyroid hormone synthesis,hsa04919:Thyroid hormone signaling pathway,hsa04960:Aldosterone-regulated sodium reabsorption,hsa04961:Endocrine and other factor-regulated calcium reabsorption,hsa04964:Proximal tubule…
P54709	ATP1B3	0.0089829	GO:0006810~transport,GO:0006813~potassium ion transport,GO:0006814~sodium ion transport,GO:0006883~cellular sodium ion homeostasis,GO:0010107~potassium ion import,GO:0010248~establishment or maintenance of transmembrane electrochemical gradient,GO:0030007~cellular potassium ion homeostasis,GO:0032781~positive regulation of ATPase activity,GO:0034220~ion transmembrane transport,GO:0036376~sodium i…	GO:0005886~plasma membrane,GO:0005890~sodium:potassium-exchanging ATPase complex,GO:0005901~caveola,GO:0042470~melanosome,GO:0070062~extracellular exosome,	GO:0001671~ATPase activator activity,GO:0005391~sodium:potassium-exchanging ATPase activity,GO:0051117~ATPase binding,	hsa04022:cGMP-PKG signaling pathway,hsa04024:cAMP signaling pathway,hsa04260:Cardiac muscle contraction,hsa04261:Adrenergic signaling in cardiomyocytes,hsa04911:Insulin secretion,hsa04918:Thyroid hormone synthesis,hsa04919:Thyroid hormone signaling pathway,hsa04960:Aldosterone-regulated sodium reabsorption,hsa04961:Endocrine and other factor-regulated calcium reabsorption,hsa04964:Proximal tubule…
Q10589	BST2	0.000164415	GO:0002737~negative regulation of plasmacytoid dendritic cell cytokine production,GO:0006959~humoral immune response,GO:0007267~cell-cell signaling,GO:0007275~multicellular organism development,GO:0008283~cell proliferation,GO:0009615~response to virus,GO:0010951~negative regulation of endopeptidase activity,GO:0030308~negative regulation of cell growth,GO:0030336~negative regulation of cell migr…	GO:0005737~cytoplasm,GO:0005771~multivesicular body,GO:0005794~Golgi apparatus,GO:0005886~plasma membrane,GO:0005887~integral component of plasma membrane,GO:0009986~cell surface,GO:0016020~membrane,GO:0016021~integral component of membrane,GO:0016324~apical plasma membrane,GO:0031225~anchored component of membrane,GO:0045121~membrane raft,GO:0070062~extracellular exosome,	GO:0004871~signal transducer activity,GO:0005515~protein binding,GO:0008191~metalloendopeptidase inhibitor activity,GO:0042803~protein homodimerization activity,GO:0044822~poly(A) RNA binding,
Q03135	CAV1	0.000119973	GO:0000122~negative regulation of transcription from RNA polymerase II promoter,GO:0000165~MAPK cascade,GO:0000188~inactivation of MAPK activity,GO:0001525~angiogenesis,GO:0001570~vasculogenesis,GO:0001666~response to hypoxia,GO:0001937~negative regulation of endothelial cell proliferation,GO:0001960~negative regulation of cytokine-mediated signaling pathway,GO:0002931~response to ischemia,GO:000…	GO:0000139~Golgi membrane,GO:0002080~acrosomal membrane,GO:0005622~intracellular,GO:0005768~endosome,GO:0005783~endoplasmic reticulum,GO:0005789~endoplasmic reticulum membrane,GO:0005811~lipid particle,GO:0005886~plasma membrane,GO:0005887~integral component of plasma membrane,GO:0005901~caveola,GO:0005925~focal adhesion,GO:0005929~cilium,GO:0005938~cell cortex,GO:0016020~membrane,GO:0016021~inte…	GO:0005102~receptor binding,GO:0005113~patched binding,GO:0005198~structural molecule activity,GO:0005515~protein binding,GO:0015485~cholesterol binding,GO:0016504~peptidase activator activity,GO:0019899~enzyme binding,GO:0019901~protein kinase binding,GO:0030674~protein binding, bridging,GO:0032947~protein complex scaffold,GO:0042802~identical protein binding,GO:0044325~ion channel binding,GO:00…	hsa04144:Endocytosis,hsa04510:Focal adhesion,hsa05100:Bacterial invasion of epithelial cells,hsa05205:Proteoglycans in cancer,hsa05416:Viral myocarditis,
A0A0C4DGH0	CD276	0.37269	GO:0006955~immune response,GO:0008283~cell proliferation,GO:0030501~positive regulation of bone mineralization,GO:0042102~positive regulation of T cell proliferation,GO:0042110~T cell activation,GO:0042130~negative regulation of T cell proliferation,GO:0045077~negative regulation of interferon-gamma biosynthetic process,GO:0045078~positive regulation of interferon-gamma biosynthetic process,GO:00…	GO:0009897~external side of plasma membrane,GO:0016021~integral component of membrane,GO:0070062~extracellular exosome,	GO:0005102~receptor binding,GO:0005515~protein binding,	hsa04514:Cell adhesion molecules (CAMs),
Q9Y5K6	CD2AP	0.191	GO:0006461~protein complex assembly,GO:0006930~substrate-dependent cell migration, cell extension,GO:0007010~cytoskeleton organization,GO:0007067~mitotic nuclear division,GO:0007165~signal transduction,GO:0016050~vesicle organization,GO:0016337~single organismal cell-cell adhesion,GO:0032911~negative regulation of transforming growth factor beta1 production,GO:0043161~proteasome-mediated ubiquiti…	GO:0001726~ruffle,GO:0005730~nucleolus,GO:0005737~cytoplasm,GO:0005886~plasma membrane,GO:0005913~cell-cell adherens junction,GO:0015629~actin cytoskeleton,GO:0030139~endocytic vesicle,GO:0031941~filamentous actin,GO:0048471~perinuclear region of cytoplasm,GO:0070062~extracellular exosome,	GO:0005172~vascular endothelial growth factor receptor binding,GO:0005200~structural constituent of cytoskeleton,GO:0005515~protein binding,GO:0008013~beta-catenin binding,GO:0008022~protein C-terminus binding,GO:0017124~SH3 domain binding,GO:0032403~protein complex binding,GO:0098641~cadherin binding involved in cell-cell adhesion,	hsa05100:Bacterial invasion of epithelial cells,
H0YD13	CD44	0.441958	GO:0007155~cell adhesion,GO:0007160~cell-matrix adhesion,GO:0016337~single organismal cell-cell adhesion,GO:0022617~extracellular matrix disassembly,GO:0030198~extracellular matrix organization,GO:0030214~hyaluronan catabolic process,GO:0033138~positive regulation of peptidyl-serine phosphorylation,GO:0033674~positive regulation of kinase activity,GO:0034116~positive regulation of heterotypic cel…	GO:0005737~cytoplasm,GO:0005794~Golgi apparatus,GO:0005886~plasma membrane,GO:0005887~integral component of plasma membrane,GO:0005925~focal adhesion,GO:0009986~cell surface,GO:0016021~integral component of membrane,GO:0035692~macrophage migration inhibitory factor receptor complex,GO:0070062~extracellular exosome,	GO:0004896~cytokine receptor activity,GO:0005515~protein binding,GO:0005518~collagen binding,GO:0005540~hyaluronic acid binding,	hsa04512:ECM-receptor interaction,hsa04640:Hematopoietic cell lineage,hsa05131:Shigellosis,hsa05169:Epstein-Barr virus infection,hsa05205:Proteoglycans in cancer,hsa05206:MicroRNAs in cancer,
P15529	CD46	0.0437779	GO:0002250~adaptive immune response,GO:0002456~T cell mediated immunity,GO:0006508~proteolysis,GO:0006958~complement activation, classical pathway,GO:0007338~single fertilization,GO:0008593~regulation of Notch signaling pathway,GO:0010628~positive regulation of gene expression,GO:0010629~negative regulation of gene expression,GO:0030449~regulation of complement activation,GO:0032613~interleukin-1…	GO:0002079~inner acrosomal membrane,GO:0005794~Golgi apparatus,GO:0005886~plasma membrane,GO:0005887~integral component of plasma membrane,GO:0005925~focal adhesion,GO:0009986~cell surface,GO:0016021~integral component of membrane,GO:0016323~basolateral plasma membrane,GO:0070062~extracellular exosome,	GO:0001618~virus receptor activity,GO:0001848~complement binding,GO:0004175~endopeptidase activity,GO:0004857~enzyme inhibitor activity,GO:0004872~receptor activity,GO:0005515~protein binding,GO:0045296~cadherin binding,	hsa04610:Complement and coagulation cascades,hsa05162:Measles,
F8VNT9	CD63	0.374373	GO:0002092~positive regulation of receptor internalization,GO:0002576~platelet degranulation,GO:0007160~cell-matrix adhesion,GO:0015031~protein transport,GO:0016477~cell migration,GO:0034613~cellular protein localization,GO:0035646~endosome to melanosome transport,GO:0048757~pigment granule maturation,GO:0050931~pigment cell differentiation,GO:1900746~regulation of vascular endothelial growth fac…	GO:0005615~extracellular space,GO:0005764~lysosome,GO:0005765~lysosomal membrane,GO:0005770~late endosome,GO:0005886~plasma membrane,GO:0005887~integral component of plasma membrane,GO:0009986~cell surface,GO:0010008~endosome membrane,GO:0016021~integral component of membrane,GO:0031088~platelet dense granule membrane,GO:0031226~intrinsic component of plasma membrane,GO:0031902~late endosome memb…	GO:0005515~protein binding,	hsa04142:Lysosome,hsa05205:Proteoglycans in cancer,
P04233	CD74	3.28628e-05	GO:0000187~activation of MAPK activity,GO:0001516~prostaglandin biosynthetic process,GO:0001961~positive regulation of cytokine-mediated signaling pathway,GO:0002606~positive regulation of dendritic cell antigen processing and presentation,GO:0002792~negative regulation of peptide secretion,GO:0002830~positive regulation of type 2 immune response,GO:0002906~negative regulation of mature B cell ap…	GO:0000139~Golgi membrane,GO:0005622~intracellular,GO:0005765~lysosomal membrane,GO:0005771~multivesicular body,GO:0005773~vacuole,GO:0005886~plasma membrane,GO:0009897~external side of plasma membrane,GO:0009986~cell surface,GO:0012507~ER to Golgi transport vesicle membrane,GO:0016020~membrane,GO:0016021~integral component of membrane,GO:0030658~transport vesicle membrane,GO:0030666~endocytic ve…	GO:0001540~beta-amyloid binding,GO:0004896~cytokine receptor activity,GO:0005515~protein binding,GO:0019955~cytokine binding,GO:0023026~MHC class II protein complex binding,GO:0035718~macrophage migration inhibitory factor binding,GO:0042289~MHC class II protein binding,GO:0042658~MHC class II protein binding, via antigen binding groove,GO:0042802~identical protein binding,GO:0044183~protein bind…	hsa04612:Antigen processing and presentation,hsa05152:Tuberculosis,hsa05168:Herpes simplex infection,
E9PJK1	CD81	0.831833	GO:0000187~activation of MAPK activity,GO:0007166~cell surface receptor signaling pathway,GO:0008104~protein localization,GO:0008283~cell proliferation,GO:0008284~positive regulation of cell proliferation,GO:0030890~positive regulation of B cell proliferation,GO:0031623~receptor internalization,GO:0031647~regulation of protein stability,GO:0043128~positive regulation of 1-phosphatidylinositol 4-k…	GO:0001772~immunological synapse,GO:0005886~plasma membrane,GO:0005887~integral component of plasma membrane,GO:0005925~focal adhesion,GO:0016020~membrane,GO:0016021~integral component of membrane,GO:0031982~vesicle,GO:0070062~extracellular exosome,	GO:0005515~protein binding,GO:0023026~MHC class II protein complex binding,GO:1990459~transferrin receptor binding,	hsa04662:B cell receptor signaling pathway,hsa05144:Malaria,hsa05160:Hepatitis C,
E9PM31	CD81	0.0496662
P60953	CDC42	0.000753543	GO:0002040~sprouting angiogenesis,GO:0003161~cardiac conduction system development,GO:0003334~keratinocyte development,GO:0006897~endocytosis,GO:0007030~Golgi organization,GO:0007088~regulation of mitotic nuclear division,GO:0007097~nuclear migration,GO:0007163~establishment or maintenance of cell polarity,GO:0007264~small GTPase mediated signal transduction,GO:0007596~blood coagulation,GO:001062…	GO:0000139~Golgi membrane,GO:0000322~storage vacuole,GO:0005622~intracellular,GO:0005737~cytoplasm,GO:0005789~endoplasmic reticulum membrane,GO:0005815~microtubule organizing center,GO:0005829~cytosol,GO:0005886~plasma membrane,GO:0005911~cell-cell junction,GO:0005925~focal adhesion,GO:0016020~membrane,GO:0030141~secretory granule,GO:0030175~filopodium,GO:0030496~midbody,GO:0031256~leading edge m…	GO:0003924~GTPase activity,GO:0005515~protein binding,GO:0005525~GTP binding,GO:0019901~protein kinase binding,GO:0030742~GTP-dependent protein binding,GO:0031435~mitogen-activated protein kinase kinase kinase binding,GO:0031996~thioesterase binding,GO:0034191~apolipoprotein A-I receptor binding,GO:0042802~identical protein binding,GO:0051022~Rho GDP-dissociation inhibitor binding,GO:0061630~ubiq…	hsa04010:MAPK signaling pathway,hsa04014:Ras signaling pathway,hsa04015:Rap1 signaling pathway,hsa04062:Chemokine signaling pathway,hsa04144:Endocytosis,hsa04360:Axon guidance,hsa04370:VEGF signaling pathway,hsa04510:Focal adhesion,hsa04520:Adherens junction,hsa04530:Tight junction,hsa04660:T cell receptor signaling pathway,hsa04666:Fc gamma R-mediated phagocytosis,hsa04670:Leukocyte transendothe…
Q9P2M7	CGN	0.289436	GO:0007179~transforming growth factor beta receptor signaling pathway,GO:0098609~cell-cell adhesion,	GO:0005913~cell-cell adherens junction,GO:0005923~bicellular tight junction,GO:0016459~myosin complex,GO:0030054~cell junction,	GO:0003774~motor activity,GO:0003779~actin binding,GO:0005515~protein binding,GO:0098641~cadherin binding involved in cell-cell adhesion,	hsa04530:Tight junction,
Q0VF96	CGNL1	0.00679441		GO:0005923~bicellular tight junction,GO:0016459~myosin complex,	GO:0003774~motor activity,
P78369	CLDN10	0.0615641	GO:0006811~ion transport,GO:0007155~cell adhesion,GO:0016338~calcium-independent cell-cell adhesion via plasma membrane cell-adhesion molecules,	GO:0005737~cytoplasm,GO:0005886~plasma membrane,GO:0005923~bicellular tight junction,GO:0016021~integral component of membrane,	GO:0005198~structural molecule activity,GO:0042802~identical protein binding,	hsa04514:Cell adhesion molecules (CAMs),hsa04530:Tight junction,hsa04670:Leukocyte transendothelial migration,hsa05160:Hepatitis C,
H3BVI6	CNN2	0.00946314	GO:0007010~cytoskeleton organization,GO:0010628~positive regulation of gene expression,GO:0030097~hemopoiesis,GO:0030336~negative regulation of cell migration,GO:0031032~actomyosin structure organization,GO:0032970~regulation of actin filament-based process,GO:0042060~wound healing,GO:0042127~regulation of cell proliferation,GO:0050765~negative regulation of phagocytosis,GO:0071260~cellular respo…	GO:0001725~stress fiber,GO:0005856~cytoskeleton,GO:0005911~cell-cell junction,GO:0005913~cell-cell adherens junction,GO:0005925~focal adhesion,GO:0016020~membrane,GO:0070062~extracellular exosome,	GO:0003779~actin binding,GO:0005516~calmodulin binding,GO:0098641~cadherin binding involved in cell-cell adhesion,
P31146	CORO1A	0.00026294	GO:0001771~immunological synapse formation,GO:0001845~phagolysosome assembly,GO:0006816~calcium ion transport,GO:0006909~phagocytosis,GO:0006928~movement of cell or subcellular component,GO:0007015~actin filament organization,GO:0008360~regulation of cell shape,GO:0030036~actin cytoskeleton organization,GO:0030335~positive regulation of cell migration,GO:0030595~leukocyte chemotaxis,GO:0030833~re…	GO:0001772~immunological synapse,GO:0001891~phagocytic cup,GO:0005634~nucleus,GO:0005737~cytoplasm,GO:0005769~early endosome,GO:0005829~cytosol,GO:0005884~actin filament,GO:0005886~plasma membrane,GO:0005911~cell-cell junction,GO:0015629~actin cytoskeleton,GO:0016020~membrane,GO:0030027~lamellipodium,GO:0030424~axon,GO:0030670~phagocytic vesicle membrane,GO:0030864~cortical actin cytoskeleton,GO:…	GO:0003779~actin binding,GO:0003785~actin monomer binding,GO:0005515~protein binding,GO:0008022~protein C-terminus binding,GO:0008092~cytoskeletal protein binding,GO:0032036~myosin heavy chain binding,GO:0042803~protein homodimerization activity,GO:0043548~phosphatidylinositol 3-kinase binding,GO:0044822~poly(A) RNA binding,GO:0051015~actin filament binding,	hsa04145:Phagosome,hsa05152:Tuberculosis,
P41240	CSK	0.00470749	GO:0001817~regulation of cytokine production,GO:0002250~adaptive immune response,GO:0006468~protein phosphorylation,GO:0007169~transmembrane receptor protein tyrosine kinase signaling pathway,GO:0007173~epidermal growth factor receptor signaling pathway,GO:0007417~central nervous system development,GO:0007420~brain development,GO:0008285~negative regulation of cell proliferation,GO:0010989~negati…	GO:0005737~cytoplasm,GO:0005829~cytosol,GO:0005886~plasma membrane,GO:0005911~cell-cell junction,GO:0031234~extrinsic component of cytoplasmic side of plasma membrane,GO:0045121~membrane raft,GO:0070062~extracellular exosome,	GO:0004713~protein tyrosine kinase activity,GO:0004715~non-membrane spanning protein tyrosine kinase activity,GO:0005102~receptor binding,GO:0005515~protein binding,GO:0005524~ATP binding,GO:0008022~protein C-terminus binding,GO:0016301~kinase activity,GO:0019903~protein phosphatase binding,GO:0034236~protein kinase A catalytic subunit binding,GO:0042802~identical protein binding,GO:0046872~metal…	hsa05120:Epithelial cell signaling in Helicobacter pylori infection,
P35221	CTNNA1	1.94871e-05	GO:0001541~ovarian follicle development,GO:0007015~actin filament organization,GO:0007155~cell adhesion,GO:0007163~establishment or maintenance of cell polarity,GO:0007406~negative regulation of neuroblast proliferation,GO:0007568~aging,GO:0008584~male gonad development,GO:0016264~gap junction assembly,GO:0031103~axon regeneration,GO:0034332~adherens junction organization,GO:0034613~cellular prot…	GO:0001669~acrosomal vesicle,GO:0005794~Golgi apparatus,GO:0005829~cytosol,GO:0005886~plasma membrane,GO:0005911~cell-cell junction,GO:0005912~adherens junction,GO:0005913~cell-cell adherens junction,GO:0005915~zonula adherens,GO:0005925~focal adhesion,GO:0014704~intercalated disc,GO:0015629~actin cytoskeleton,GO:0016342~catenin complex,GO:0016600~flotillin complex,GO:0030027~lamellipodium,GO:003…	GO:0005198~structural molecule activity,GO:0005515~protein binding,GO:0008013~beta-catenin binding,GO:0017166~vinculin binding,GO:0044822~poly(A) RNA binding,GO:0045295~gamma-catenin binding,GO:0045296~cadherin binding,GO:0046982~protein heterodimerization activity,GO:0051015~actin filament binding,GO:0098641~cadherin binding involved in cell-cell adhesion,	hsa04390:Hippo signaling pathway,hsa04520:Adherens junction,hsa04670:Leukocyte transendothelial migration,hsa05100:Bacterial invasion of epithelial cells,hsa05200:Pathways in cancer,hsa05213:Endometrial cancer,hsa05412:Arrhythmogenic right ventricular cardiomyopathy (ARVC),
Q16643	DBN1	0.0759431	GO:0007015~actin filament organization,GO:0010643~cell communication by chemical coupling,GO:0010644~cell communication by electrical coupling,GO:0032507~maintenance of protein location in cell,GO:0048168~regulation of neuronal synaptic plasticity,GO:0050773~regulation of dendrite development,GO:0061351~neural precursor cell proliferation,GO:0098609~cell-cell adhesion,	GO:0005622~intracellular,GO:0005737~cytoplasm,GO:0005886~plasma membrane,GO:0005913~cell-cell adherens junction,GO:0005921~gap junction,GO:0005938~cell cortex,GO:0015629~actin cytoskeleton,GO:0030425~dendrite,GO:0030426~growth cone,GO:0042641~actomyosin,	GO:0003779~actin binding,GO:0005515~protein binding,GO:0005522~profilin binding,GO:0098641~cadherin binding involved in cell-cell adhesion,
Q9UJU6	DBNL	0.401604	GO:0002250~adaptive immune response,GO:0006898~receptor-mediated endocytosis,GO:0007257~activation of JUN kinase activity,GO:0007416~synapse assembly,GO:0016601~Rac protein signal transduction,GO:0048812~neuron projection morphogenesis,GO:0071800~podosome assembly,GO:0097178~ruffle assembly,GO:0098609~cell-cell adhesion,	GO:0000139~Golgi membrane,GO:0001726~ruffle,GO:0002102~podosome,GO:0005622~intracellular,GO:0005737~cytoplasm,GO:0005769~early endosome,GO:0005829~cytosol,GO:0005886~plasma membrane,GO:0005913~cell-cell adherens junction,GO:0005938~cell cortex,GO:0014069~postsynaptic density,GO:0030027~lamellipodium,GO:0030425~dendrite,GO:0030665~clathrin-coated vesicle membrane,GO:0070062~extracellular exosome,	GO:0003779~actin binding,GO:0005515~protein binding,GO:0008022~protein C-terminus binding,GO:0008047~enzyme activator activity,GO:0019904~protein domain specific binding,GO:0051015~actin filament binding,GO:0098641~cadherin binding involved in cell-cell adhesion,
O95786	DDX58	0.00113354	GO:0002230~positive regulation of defense response to virus by host,GO:0009597~detection of virus,GO:0009615~response to virus,GO:0010628~positive regulation of gene expression,GO:0030334~regulation of cell migration,GO:0032480~negative regulation of type I interferon production,GO:0032725~positive regulation of granulocyte macrophage colony-stimulating factor production,GO:0032727~positive regul…	GO:0005737~cytoplasm,GO:0005829~cytosol,GO:0005923~bicellular tight junction,GO:0015629~actin cytoskeleton,GO:0032587~ruffle membrane,	GO:0003676~nucleic acid binding,GO:0003690~double-stranded DNA binding,GO:0003725~double-stranded RNA binding,GO:0003727~single-stranded RNA binding,GO:0004386~helicase activity,GO:0005515~protein binding,GO:0005524~ATP binding,GO:0008270~zinc ion binding,GO:0016817~hydrolase activity, acting on acid anhydrides,GO:0042802~identical protein binding,	hsa04064:NF-kappa B signaling pathway,hsa04622:RIG-I-like receptor signaling pathway,hsa04623:Cytosolic DNA-sensing pathway,hsa05160:Hepatitis C,hsa05161:Hepatitis B,hsa05162:Measles,hsa05164:Influenza A,hsa05168:Herpes simplex infection,hsa05169:Epstein-Barr virus infection,
P17661	DES	1.77628e-07	GO:0006936~muscle contraction,GO:0007010~cytoskeleton organization,GO:0008016~regulation of heart contraction,GO:0030049~muscle filament sliding,GO:0045109~intermediate filament organization,	GO:0005829~cytosol,GO:0005882~intermediate filament,GO:0005916~fascia adherens,GO:0014704~intercalated disc,GO:0030018~Z disc,GO:0031594~neuromuscular junction,GO:0042383~sarcolemma,GO:0045111~intermediate filament cytoskeleton,GO:0070062~extracellular exosome,	GO:0005198~structural molecule activity,GO:0005200~structural constituent of cytoskeleton,GO:0005515~protein binding,GO:0008092~cytoskeletal protein binding,GO:0042802~identical protein binding,	hsa05410:Hypertrophic cardiomyopathy (HCM),hsa05412:Arrhythmogenic right ventricular cardiomyopathy (ARVC),hsa05414:Dilated cardiomyopathy,
O00429	DNM1L	4.23163e-05	GO:0000266~mitochondrial fission,GO:0001836~release of cytochrome c from mitochondria,GO:0003374~dynamin polymerization involved in mitochondrial fission,GO:0006897~endocytosis,GO:0006921~cellular component disassembly involved in execution phase of apoptosis,GO:0007005~mitochondrion organization,GO:0007029~endoplasmic reticulum organization,GO:0010821~regulation of mitochondrion organization,GO:…	GO:0005737~cytoplasm,GO:0005739~mitochondrion,GO:0005741~mitochondrial outer membrane,GO:0005777~peroxisome,GO:0005783~endoplasmic reticulum,GO:0005789~endoplasmic reticulum membrane,GO:0005794~Golgi apparatus,GO:0005829~cytosol,GO:0005874~microtubule,GO:0005903~brush border,GO:0005905~clathrin-coated pit,GO:0015630~microtubule cytoskeleton,GO:0016020~membrane,GO:0030054~cell junction,GO:0030672~…	GO:0003924~GTPase activity,GO:0005096~GTPase activator activity,GO:0005515~protein binding,GO:0005525~GTP binding,GO:0008017~microtubule binding,GO:0008289~lipid binding,GO:0017137~Rab GTPase binding,GO:0030742~GTP-dependent protein binding,GO:0031625~ubiquitin protein ligase binding,GO:0042802~identical protein binding,GO:0042803~protein homodimerization activity,	hsa04668:TNF signaling pathway,
P50570	DNM2	0.0894379	GO:0000086~G2/M transition of mitotic cell cycle,GO:0000266~mitochondrial fission,GO:0002031~G-protein coupled receptor internalization,GO:0003281~ventricular septum development,GO:0003374~dynamin polymerization involved in mitochondrial fission,GO:0006355~regulation of transcription, DNA-templated,GO:0006893~Golgi to plasma membrane transport,GO:0006897~endocytosis,GO:0006898~receptor-mediated e…	GO:0000139~Golgi membrane,GO:0001891~phagocytic cup,GO:0001917~photoreceptor inner segment,GO:0005634~nucleus,GO:0005737~cytoplasm,GO:0005768~endosome,GO:0005794~Golgi apparatus,GO:0005802~trans-Golgi network,GO:0005813~centrosome,GO:0005829~cytosol,GO:0005874~microtubule,GO:0005886~plasma membrane,GO:0005905~clathrin-coated pit,GO:0005925~focal adhesion,GO:0014069~postsynaptic density,GO:0030027…	GO:0003924~GTPase activity,GO:0005515~protein binding,GO:0005525~GTP binding,GO:0008017~microtubule binding,GO:0017124~SH3 domain binding,GO:0019899~enzyme binding,GO:0019901~protein kinase binding,GO:0031749~D2 dopamine receptor binding,GO:0032403~protein complex binding,GO:0036312~phosphatidylinositol 3-kinase regulatory subunit binding,GO:0050699~WW domain binding,GO:0050998~nitric-oxide synth…	hsa04144:Endocytosis,hsa04721:Synaptic vesicle cycle,hsa04961:Endocrine and other factor-regulated calcium reabsorption,hsa05100:Bacterial invasion of epithelial cells,
P27487	DPP4	0.0028422	GO:0001662~behavioral fear response,GO:0001666~response to hypoxia,GO:0006508~proteolysis,GO:0008284~positive regulation of cell proliferation,GO:0010716~negative regulation of extracellular matrix disassembly,GO:0031295~T cell costimulation,GO:0033632~regulation of cell-cell adhesion mediated by integrin,GO:0035641~locomotory exploration behavior,GO:0036343~psychomotor behavior,GO:0042110~T cell…	GO:0005765~lysosomal membrane,GO:0005886~plasma membrane,GO:0005925~focal adhesion,GO:0009986~cell surface,GO:0016020~membrane,GO:0016021~integral component of membrane,GO:0016324~apical plasma membrane,GO:0030027~lamellipodium,GO:0030139~endocytic vesicle,GO:0031258~lamellipodium membrane,GO:0045121~membrane raft,GO:0046581~intercellular canaliculus,GO:0070062~extracellular exosome,GO:0071438~in…	GO:0001618~virus receptor activity,GO:0002020~protease binding,GO:0004252~serine-type endopeptidase activity,GO:0005102~receptor binding,GO:0005515~protein binding,GO:0008236~serine-type peptidase activity,GO:0008239~dipeptidyl-peptidase activity,GO:0042802~identical protein binding,GO:0042803~protein homodimerization activity,	hsa04974:Protein digestion and absorption,
Q14126	DSG2	0.887898	GO:0002934~desmosome organization,GO:0003165~Purkinje myocyte development,GO:0007155~cell adhesion,GO:0007156~homophilic cell adhesion via plasma membrane adhesion molecules,GO:0032570~response to progesterone,GO:0060135~maternal process involved in female pregnancy,GO:0086073~bundle of His cell-Purkinje myocyte adhesion involved in cell communication,GO:0086091~regulation of heart rate by cardia…	GO:0005886~plasma membrane,GO:0005911~cell-cell junction,GO:0009986~cell surface,GO:0014704~intercalated disc,GO:0016021~integral component of membrane,GO:0016324~apical plasma membrane,GO:0016328~lateral plasma membrane,GO:0030057~desmosome,GO:0070062~extracellular exosome,	GO:0005509~calcium ion binding,GO:0050839~cell adhesion molecule binding,GO:0086083~cell adhesive protein binding involved in bundle of His cell-Purkinje myocyte communication,	hsa05412:Arrhythmogenic right ventricular cardiomyopathy (ARVC),
Q8N8S7	ENAH	0.000295767	GO:0007411~axon guidance,	GO:0005737~cytoplasm,GO:0005829~cytosol,GO:0005856~cytoskeleton,GO:0005886~plasma membrane,GO:0005925~focal adhesion,GO:0030027~lamellipodium,GO:0030054~cell junction,GO:0030175~filopodium,GO:0045202~synapse,	GO:0003779~actin binding,GO:0005515~protein binding,GO:0017124~SH3 domain binding,GO:0050699~WW domain binding,	hsa04810:Regulation of actin cytoskeleton,
A0A0A0MSA4	EPB41L3	0.627977	GO:0001558~regulation of cell growth,GO:0002175~protein localization to paranode region of axon,GO:0006915~apoptotic process,GO:0007016~cytoskeletal anchoring at plasma membrane,GO:0008360~regulation of cell shape,GO:0030865~cortical cytoskeleton organization,GO:0030866~cortical actin cytoskeleton organization,GO:0030913~paranodal junction assembly,GO:0031032~actomyosin structure organization,GO:…	GO:0005737~cytoplasm,GO:0005856~cytoskeleton,GO:0005886~plasma membrane,GO:0005911~cell-cell junction,GO:0014069~postsynaptic density,GO:0019898~extrinsic component of membrane,GO:0030673~axolemma,GO:0033270~paranode region of axon,GO:0044224~juxtaparanode region of axon,	GO:0003779~actin binding,GO:0005198~structural molecule activity,GO:0005200~structural constituent of cytoskeleton,GO:0005515~protein binding,
P16422	EPCAM	0.00337239	GO:0001657~ureteric bud development,GO:0008284~positive regulation of cell proliferation,GO:0023019~signal transduction involved in regulation of gene expression,GO:0043066~negative regulation of apoptotic process,GO:0045944~positive regulation of transcription from RNA polymerase II promoter,GO:0048863~stem cell differentiation,GO:0098609~cell-cell adhesion,GO:2000048~negative regulation of cell…	GO:0005886~plasma membrane,GO:0005887~integral component of plasma membrane,GO:0005923~bicellular tight junction,GO:0009986~cell surface,GO:0016021~integral component of membrane,GO:0016323~basolateral plasma membrane,GO:0016324~apical plasma membrane,GO:0016328~lateral plasma membrane,GO:0070062~extracellular exosome,	GO:0005515~protein binding,GO:0032403~protein complex binding,GO:0098641~cadherin binding involved in cell-cell adhesion,
Q12929	EPS8	0.589275	GO:0007165~signal transduction,GO:0007173~epidermal growth factor receptor signaling pathway,GO:0008283~cell proliferation,GO:0008344~adult locomotory behavior,GO:0008360~regulation of cell shape,GO:0009967~positive regulation of signal transduction,GO:0010458~exit from mitosis,GO:0016601~Rac protein signal transduction,GO:0030832~regulation of actin filament length,GO:0031532~actin cytoskeleton …	GO:0005903~brush border,GO:0005938~cell cortex,GO:0014069~postsynaptic density,GO:0017146~NMDA selective glutamate receptor complex,GO:0030054~cell junction,GO:0030426~growth cone,GO:0031982~vesicle,GO:0032420~stereocilium,GO:0032587~ruffle membrane,GO:0070062~extracellular exosome,	GO:0003779~actin binding,GO:0005070~SH3/SH2 adaptor activity,GO:0005515~protein binding,GO:0016301~kinase activity,GO:0035591~signaling adaptor activity,GO:0048365~Rac GTPase binding,
P30040	ERP29	0.0489721	GO:0000187~activation of MAPK activity,GO:0001934~positive regulation of protein phosphorylation,GO:0006457~protein folding,GO:0006886~intracellular protein transport,GO:0009306~protein secretion,GO:0010628~positive regulation of gene expression,GO:0010629~negative regulation of gene expression,GO:0043335~protein unfolding,GO:0050709~negative regulation of protein secretion,GO:1902235~regulation …	GO:0005783~endoplasmic reticulum,GO:0005788~endoplasmic reticulum lumen,GO:0005790~smooth endoplasmic reticulum,GO:0009986~cell surface,GO:0016020~membrane,GO:0030133~transport vesicle,GO:0042470~melanosome,GO:0070062~extracellular exosome,	GO:0003756~protein disulfide isomerase activity,GO:0042803~protein homodimerization activity,GO:0051087~chaperone binding,	hsa04141:Protein processing in endoplasmic reticulum,
Q9BS26	ERP44	0.502989	GO:0006457~protein folding,GO:0006986~response to unfolded protein,GO:0009100~glycoprotein metabolic process,GO:0034976~response to endoplasmic reticulum stress,GO:0045454~cell redox homeostasis,	GO:0005788~endoplasmic reticulum lumen,GO:0005789~endoplasmic reticulum membrane,GO:0005793~endoplasmic reticulum-Golgi intermediate compartment,GO:0009986~cell surface,GO:0070062~extracellular exosome,	GO:0003756~protein disulfide isomerase activity,GO:0005515~protein binding,
Q9UI08	EVL	0.0736553	GO:0007015~actin filament organization,GO:0007166~cell surface receptor signaling pathway,GO:0007399~nervous system development,GO:0007411~axon guidance,GO:0008154~actin polymerization or depolymerization,GO:0009887~organ morphogenesis,GO:0010633~negative regulation of epithelial cell migration,GO:0030838~positive regulation of actin filament polymerization,GO:0051289~protein homotetramerization,…	GO:0005737~cytoplasm,GO:0005829~cytosol,GO:0005856~cytoskeleton,GO:0005925~focal adhesion,GO:0016020~membrane,GO:0030027~lamellipodium,	GO:0003779~actin binding,GO:0005515~protein binding,GO:0005522~profilin binding,GO:0017124~SH3 domain binding,
Q9Y624	F11R	0.595076	GO:0001817~regulation of cytokine production,GO:0006954~inflammatory response,GO:0007155~cell adhesion,GO:0007179~transforming growth factor beta receptor signaling pathway,GO:0009314~response to radiation,GO:0030198~extracellular matrix organization,GO:0030855~epithelial cell differentiation,GO:0031032~actomyosin structure organization,GO:0034260~negative regulation of GTPase activity,GO:0043547…	GO:0005886~plasma membrane,GO:0005911~cell-cell junction,GO:0005913~cell-cell adherens junction,GO:0005923~bicellular tight junction,GO:0015630~microtubule cytoskeleton,GO:0016021~integral component of membrane,GO:0030054~cell junction,GO:0031410~cytoplasmic vesicle,GO:0036057~slit diaphragm,GO:0070062~extracellular exosome,	GO:0001618~virus receptor activity,GO:0005515~protein binding,GO:0030165~PDZ domain binding,GO:0098641~cadherin binding involved in cell-cell adhesion,	hsa04514:Cell adhesion molecules (CAMs),hsa04530:Tight junction,hsa04670:Leukocyte transendothelial migration,hsa05120:Epithelial cell signaling in Helicobacter pylori infection,
Q9Y4F1	FARP1	0.0322668	GO:0007416~synapse assembly,GO:0010923~negative regulation of phosphatase activity,GO:0035023~regulation of Rho protein signal transduction,GO:0043547~positive regulation of GTPase activity,GO:0048813~dendrite morphogenesis,	GO:0005737~cytoplasm,GO:0005829~cytosol,GO:0005856~cytoskeleton,GO:0019898~extrinsic component of membrane,GO:0030054~cell junction,GO:0030175~filopodium,GO:0030425~dendrite,GO:0031234~extrinsic component of cytoplasmic side of plasma membrane,GO:0043197~dendritic spine,	GO:0005089~Rho guanyl-nucleotide exchange factor activity,GO:0008092~cytoskeletal protein binding,GO:0030676~Rac guanyl-nucleotide exchange factor activity,
D6R9I4	FBLIM1	0.418932	GO:0008360~regulation of cell shape,GO:0016337~single organismal cell-cell adhesion,GO:0033623~regulation of integrin activation,GO:0034329~cell junction assembly,	GO:0001725~stress fiber,GO:0005829~cytosol,GO:0005925~focal adhesion,GO:0005938~cell cortex,	GO:0005515~protein binding,GO:0008270~zinc ion binding,GO:0031005~filamin binding,
F5H1C6	FERMT3	4.02058e-06	GO:0007159~leukocyte cell-cell adhesion,GO:0007229~integrin-mediated signaling pathway,GO:0030335~positive regulation of cell migration,GO:0033622~integrin activation,GO:0033632~regulation of cell-cell adhesion mediated by integrin,GO:0034446~substrate adhesion-dependent cell spreading,GO:0070527~platelet aggregation,	GO:0002102~podosome,GO:0016020~membrane,GO:0030054~cell junction,GO:0042995~cell projection,GO:0070062~extracellular exosome,	GO:0005178~integrin binding,	hsa04611:Platelet activation,
O75369	FLNB	9.33429e-06	GO:0003334~keratinocyte development,GO:0003382~epithelial cell morphogenesis,GO:0007016~cytoskeletal anchoring at plasma membrane,GO:0007165~signal transduction,GO:0007519~skeletal muscle tissue development,GO:0030036~actin cytoskeleton organization,GO:0030154~cell differentiation,GO:0098609~cell-cell adhesion,	GO:0001725~stress fiber,GO:0005737~cytoplasm,GO:0005829~cytosol,GO:0005886~plasma membrane,GO:0005903~brush border,GO:0005913~cell-cell adherens junction,GO:0005925~focal adhesion,GO:0005938~cell cortex,GO:0015629~actin cytoskeleton,GO:0016021~integral component of membrane,GO:0030018~Z disc,GO:0031012~extracellular matrix,GO:0070062~extracellular exosome,	GO:0003779~actin binding,GO:0005515~protein binding,GO:0042802~identical protein binding,GO:0044822~poly(A) RNA binding,GO:0098641~cadherin binding involved in cell-cell adhesion,	hsa04010:MAPK signaling pathway,hsa04510:Focal adhesion,hsa05132:Salmonella infection,hsa05205:Proteoglycans in cancer,
O75955	FLOT1	0.00306108	GO:0001765~membrane raft assembly,GO:0001819~positive regulation of cytokine production,GO:0001934~positive regulation of protein phosphorylation,GO:0002090~regulation of receptor internalization,GO:0007409~axonogenesis,GO:0022617~extracellular matrix disassembly,GO:0032092~positive regulation of protein binding,GO:0032226~positive regulation of synaptic transmission, dopaminergic,GO:0032728~posi…	GO:0001931~uropod,GO:0005765~lysosomal membrane,GO:0005768~endosome,GO:0005769~early endosome,GO:0005815~microtubule organizing center,GO:0005886~plasma membrane,GO:0005901~caveola,GO:0005911~cell-cell junction,GO:0005913~cell-cell adherens junction,GO:0005925~focal adhesion,GO:0008180~COP9 signalosome,GO:0016020~membrane,GO:0016021~integral component of membrane,GO:0016323~basolateral plasma mem…	GO:0002020~protease binding,GO:0005515~protein binding,GO:0035255~ionotropic glutamate receptor binding,GO:0046982~protein heterodimerization activity,	hsa04910:Insulin signaling pathway,
J3QLD9	FLOT2	0.0197575	GO:0001765~membrane raft assembly,GO:0007155~cell adhesion,GO:0007268~chemical synaptic transmission,GO:0008544~epidermis development,GO:0010629~negative regulation of gene expression,GO:0034114~regulation of heterotypic cell-cell adhesion,GO:0034139~regulation of toll-like receptor 3 signaling pathway,GO:0044860~protein localization to plasma membrane raft,GO:0045661~regulation of myoblast diffe…	GO:0001931~uropod,GO:0002080~acrosomal membrane,GO:0005768~endosome,GO:0005886~plasma membrane,GO:0005901~caveola,GO:0005913~cell-cell adherens junction,GO:0005925~focal adhesion,GO:0016020~membrane,GO:0016323~basolateral plasma membrane,GO:0016324~apical plasma membrane,GO:0016600~flotillin complex,GO:0030027~lamellipodium,GO:0030139~endocytic vesicle,GO:0030864~cortical actin cytoskeleton,GO:00…	GO:0002020~protease binding,GO:0005515~protein binding,GO:0035255~ionotropic glutamate receptor binding,GO:0046982~protein heterodimerization activity,	hsa04910:Insulin signaling pathway,
Q16658	FSCN1	0.0208397	GO:0007015~actin filament organization,GO:0007043~cell-cell junction assembly,GO:0008283~cell proliferation,GO:0009653~anatomical structure morphogenesis,GO:0010592~positive regulation of lamellipodium assembly,GO:0016477~cell migration,GO:0030035~microspike assembly,GO:0030036~actin cytoskeleton organization,GO:0032534~regulation of microvillus assembly,GO:0032956~regulation of actin cytoskeleto…	GO:0001725~stress fiber,GO:0001726~ruffle,GO:0002102~podosome,GO:0005737~cytoplasm,GO:0005829~cytosol,GO:0005856~cytoskeleton,GO:0005902~microvillus,GO:0005911~cell-cell junction,GO:0005913~cell-cell adherens junction,GO:0015629~actin cytoskeleton,GO:0030027~lamellipodium,GO:0030175~filopodium,GO:0030426~growth cone,GO:0031253~cell projection membrane,GO:0031941~filamentous actin,GO:0043209~myeli…	GO:0003779~actin binding,GO:0005515~protein binding,GO:0008144~drug binding,GO:0030674~protein binding, bridging,GO:0044822~poly(A) RNA binding,GO:0051015~actin filament binding,GO:0098641~cadherin binding involved in cell-cell adhesion,
O14976	GAK	0.000806663	GO:0006468~protein phosphorylation,GO:0006898~receptor-mediated endocytosis,GO:0007029~endoplasmic reticulum organization,GO:0007030~Golgi organization,GO:0007049~cell cycle,GO:0010977~negative regulation of neuron projection development,GO:0072318~clathrin coat disassembly,GO:0072583~clathrin-mediated endocytosis,GO:0072600~establishment of protein localization to Golgi,GO:0090002~establishment …	GO:0005794~Golgi apparatus,GO:0005829~cytosol,GO:0005925~focal adhesion,GO:0016020~membrane,GO:0031982~vesicle,GO:0043231~intracellular membrane-bounded organelle,GO:0048471~perinuclear region of cytoplasm,	GO:0004672~protein kinase activity,GO:0004674~protein serine/threonine kinase activity,GO:0005515~protein binding,GO:0005524~ATP binding,GO:0016301~kinase activity,GO:0030332~cyclin binding,
K7EN79	GIT1	0.912548	GO:0008277~regulation of G-protein coupled receptor protein signaling pathway,GO:0032465~regulation of cytokinesis,GO:0043547~positive regulation of GTPase activity,GO:0048013~ephrin receptor signaling pathway,	GO:0005737~cytoplasm,GO:0005829~cytosol,GO:0005925~focal adhesion,GO:0016020~membrane,GO:0016235~aggresome,	GO:0005096~GTPase activator activity,GO:0005515~protein binding,GO:0016301~kinase activity,GO:0032403~protein complex binding,GO:0046872~metal ion binding,	hsa04144:Endocytosis,hsa04810:Regulation of actin cytoskeleton,hsa05120:Epithelial cell signaling in Helicobacter pylori infection,
F5H1Y4	GOPC	0.445137	GO:0006888~ER to Golgi vesicle-mediated transport,GO:0006893~Golgi to plasma membrane transport,GO:0007289~spermatid nucleus differentiation,GO:0015031~protein transport,GO:0043004~cytoplasmic sequestering of CFTR protein,GO:0045176~apical protein localization,GO:0051260~protein homooligomerization,	GO:0000139~Golgi membrane,GO:0005737~cytoplasm,GO:0005765~lysosomal membrane,GO:0005794~Golgi apparatus,GO:0005886~plasma membrane,GO:0014069~postsynaptic density,GO:0016020~membrane,GO:0030054~cell junction,GO:0030140~trans-Golgi network transport vesicle,GO:0030425~dendrite,GO:0030660~Golgi-associated vesicle membrane,GO:0043234~protein complex,GO:0045211~postsynaptic membrane,	GO:0005515~protein binding,GO:0030695~GTPase regulator activity,GO:0044325~ion channel binding,
P00390	GSR	0.000529706	GO:0000302~response to reactive oxygen species,GO:0006749~glutathione metabolic process,GO:0015949~nucleobase-containing small molecule interconversion,GO:0045454~cell redox homeostasis,GO:0055114~oxidation-reduction process,GO:0098869~cellular oxidant detoxification,	GO:0005739~mitochondrion,GO:0005759~mitochondrial matrix,GO:0005829~cytosol,GO:0009897~external side of plasma membrane,GO:0070062~extracellular exosome,	GO:0004362~glutathione-disulfide reductase activity,GO:0009055~electron carrier activity,GO:0016491~oxidoreductase activity,GO:0016668~oxidoreductase activity, acting on a sulfur group of donors, NAD(P) as acceptor,GO:0050660~flavin adenine dinucleotide binding,GO:0050661~NADP binding,	hsa00480:Glutathione metabolism,hsa04918:Thyroid hormone synthesis,
A0A140T9I0	HLA-A	0.00053416	GO:0001916~positive regulation of T cell mediated cytotoxicity,GO:0002474~antigen processing and presentation of peptide antigen via MHC class I,GO:0002479~antigen processing and presentation of exogenous peptide antigen via MHC class I, TAP-dependent,GO:0002480~antigen processing and presentation of exogenous peptide antigen via MHC class I, TAP-independent,GO:0002486~antigen processing and pres…	GO:0000139~Golgi membrane,GO:0005783~endoplasmic reticulum,GO:0005794~Golgi apparatus,GO:0005797~Golgi medial cisterna,GO:0005886~plasma membrane,GO:0005887~integral component of plasma membrane,GO:0009986~cell surface,GO:0012507~ER to Golgi transport vesicle membrane,GO:0016020~membrane,GO:0016021~integral component of membrane,GO:0030670~phagocytic vesicle membrane,GO:0031901~early endosome mem…	GO:0005102~receptor binding,GO:0005515~protein binding,GO:0030881~beta-2-microglobulin binding,GO:0042605~peptide antigen binding,GO:0042608~T cell receptor binding,GO:0044822~poly(A) RNA binding,GO:0046977~TAP binding,	hsa04144:Endocytosis,hsa04145:Phagosome,hsa04514:Cell adhesion molecules (CAMs),hsa04612:Antigen processing and presentation,hsa04940:Type I diabetes mellitus,hsa05166:HTLV-I infection,hsa05168:Herpes simplex infection,hsa05169:Epstein-Barr virus infection,hsa05203:Viral carcinogenesis,hsa05320:Autoimmune thyroid disease,hsa05330:Allograft rejection,hsa05332:Graft-versus-host disease,hsa05416:Vir…
P01889	HLA-B	0.000374211	GO:0001916~positive regulation of T cell mediated cytotoxicity,GO:0002474~antigen processing and presentation of peptide antigen via MHC class I,GO:0002479~antigen processing and presentation of exogenous peptide antigen via MHC class I, TAP-dependent,GO:0002480~antigen processing and presentation of exogenous peptide antigen via MHC class I, TAP-independent,GO:0002486~antigen processing and pres…	GO:0000139~Golgi membrane,GO:0005783~endoplasmic reticulum,GO:0005794~Golgi apparatus,GO:0005886~plasma membrane,GO:0005887~integral component of plasma membrane,GO:0009986~cell surface,GO:0012507~ER to Golgi transport vesicle membrane,GO:0016020~membrane,GO:0016021~integral component of membrane,GO:0030670~phagocytic vesicle membrane,GO:0031901~early endosome membrane,GO:0042612~MHC class I prot…	GO:0003823~antigen binding,GO:0005102~receptor binding,GO:0042605~peptide antigen binding,GO:0046977~TAP binding,GO:0051087~chaperone binding,	hsa04144:Endocytosis,hsa04145:Phagosome,hsa04514:Cell adhesion molecules (CAMs),hsa04612:Antigen processing and presentation,hsa04940:Type I diabetes mellitus,hsa05166:HTLV-I infection,hsa05168:Herpes simplex infection,hsa05169:Epstein-Barr virus infection,hsa05203:Viral carcinogenesis,hsa05320:Autoimmune thyroid disease,hsa05330:Allograft rejection,hsa05332:Graft-versus-host disease,hsa05416:Vir…
A0A0G2JIF0	HLA-C	0.0176159	GO:0002474~antigen processing and presentation of peptide antigen via MHC class I,GO:0002479~antigen processing and presentation of exogenous peptide antigen via MHC class I, TAP-dependent,GO:0002480~antigen processing and presentation of exogenous peptide antigen via MHC class I, TAP-independent,GO:0002486~antigen processing and presentation of endogenous peptide antigen via MHC class I via ER p…	GO:0000139~Golgi membrane,GO:0005576~extracellular region,GO:0005783~endoplasmic reticulum,GO:0005794~Golgi apparatus,GO:0005886~plasma membrane,GO:0005887~integral component of plasma membrane,GO:0009986~cell surface,GO:0012507~ER to Golgi transport vesicle membrane,GO:0016020~membrane,GO:0016021~integral component of membrane,GO:0030670~phagocytic vesicle membrane,GO:0031901~early endosome memb…	GO:0003823~antigen binding,GO:0032395~MHC class II receptor activity,GO:0042605~peptide antigen binding,GO:0046977~TAP binding,	hsa04144:Endocytosis,hsa04145:Phagosome,hsa04514:Cell adhesion molecules (CAMs),hsa04612:Antigen processing and presentation,hsa04940:Type I diabetes mellitus,hsa05166:HTLV-I infection,hsa05168:Herpes simplex infection,hsa05169:Epstein-Barr virus infection,hsa05203:Viral carcinogenesis,hsa05320:Autoimmune thyroid disease,hsa05330:Allograft rejection,hsa05332:Graft-versus-host disease,hsa05416:Vir…
A0A0G2JMH6	HLA-DRA	2.17462e-05	GO:0002503~peptide antigen assembly with MHC class II protein complex,GO:0002504~antigen processing and presentation of peptide or polysaccharide antigen via MHC class II,GO:0002506~polysaccharide assembly with MHC class II protein complex,GO:0006955~immune response,GO:0016032~viral process,GO:0019882~antigen processing and presentation,GO:0019886~antigen processing and presentation of exogenous …	GO:0000139~Golgi membrane,GO:0005764~lysosome,GO:0005765~lysosomal membrane,GO:0005886~plasma membrane,GO:0005887~integral component of plasma membrane,GO:0009986~cell surface,GO:0012507~ER to Golgi transport vesicle membrane,GO:0016021~integral component of membrane,GO:0030658~transport vesicle membrane,GO:0030666~endocytic vesicle membrane,GO:0030669~clathrin-coated endocytic vesicle membrane,G…	GO:0023026~MHC class II protein complex binding,GO:0032395~MHC class II receptor activity,GO:0042605~peptide antigen binding,	hsa04145:Phagosome,hsa04514:Cell adhesion molecules (CAMs),hsa04612:Antigen processing and presentation,hsa04640:Hematopoietic cell lineage,hsa04672:Intestinal immune network for IgA production,hsa04940:Type I diabetes mellitus,hsa05140:Leishmaniasis,hsa05145:Toxoplasmosis,hsa05150:Staphylococcus aureus infection,hsa05152:Tuberculosis,hsa05164:Influenza A,hsa05166:HTLV-I infection,hsa05168:Herpes…
P01911	HLA-DRB1	0.00127145	GO:0002381~immunoglobulin production involved in immunoglobulin mediated immune response,GO:0002437~inflammatory response to antigenic stimulus,GO:0002455~humoral immune response mediated by circulating immunoglobulin,GO:0002503~peptide antigen assembly with MHC class II protein complex,GO:0002504~antigen processing and presentation of peptide or polysaccharide antigen via MHC class II,GO:0002506…	GO:0000139~Golgi membrane,GO:0005765~lysosomal membrane,GO:0005886~plasma membrane,GO:0005887~integral component of plasma membrane,GO:0009897~external side of plasma membrane,GO:0009986~cell surface,GO:0012507~ER to Golgi transport vesicle membrane,GO:0016020~membrane,GO:0016021~integral component of membrane,GO:0030658~transport vesicle membrane,GO:0030666~endocytic vesicle membrane,GO:0030669~…	GO:0001618~virus receptor activity,GO:0023026~MHC class II protein complex binding,GO:0032395~MHC class II receptor activity,GO:0042605~peptide antigen binding,	hsa04145:Phagosome,hsa04514:Cell adhesion molecules (CAMs),hsa04612:Antigen processing and presentation,hsa04640:Hematopoietic cell lineage,hsa04672:Intestinal immune network for IgA production,hsa04940:Type I diabetes mellitus,hsa05140:Leishmaniasis,hsa05145:Toxoplasmosis,hsa05150:Staphylococcus aureus infection,hsa05152:Tuberculosis,hsa05164:Influenza A,hsa05166:HTLV-I infection,hsa05168:Herpes…
A0A140T958	HLA-DRB1	4.06742e-05
Q8TCT9	HM13	0.0033648	GO:0006465~signal peptide processing,GO:0006509~membrane protein ectodomain proteolysis,GO:0031293~membrane protein intracellular domain proteolysis,GO:0033619~membrane protein proteolysis,GO:0051289~protein homotetramerization,GO:1904211~membrane protein proteolysis involved in retrograde protein transport, ER to cytosol,	GO:0005765~lysosomal membrane,GO:0005783~endoplasmic reticulum,GO:0005789~endoplasmic reticulum membrane,GO:0005791~rough endoplasmic reticulum,GO:0005886~plasma membrane,GO:0009986~cell surface,GO:0016020~membrane,GO:0016021~integral component of membrane,GO:0030660~Golgi-associated vesicle membrane,GO:0036513~Derlin-1 retrotranslocation complex,GO:0071458~integral component of cytoplasmic side …	GO:0004190~aspartic-type endopeptidase activity,GO:0005515~protein binding,GO:0008233~peptidase activity,GO:0031625~ubiquitin protein ligase binding,GO:0042500~aspartic endopeptidase activity, intramembrane cleaving,GO:0042803~protein homodimerization activity,
P08238	HSP90AB1	0.00258326	GO:0001890~placenta development,GO:0006457~protein folding,GO:0006950~response to stress,GO:0006986~response to unfolded protein,GO:0009651~response to salt stress,GO:0019062~virion attachment to host cell,GO:0030511~positive regulation of transforming growth factor beta receptor signaling pathway,GO:0031396~regulation of protein ubiquitination,GO:0032092~positive regulation of protein binding,GO…	GO:0005634~nucleus,GO:0005654~nucleoplasm,GO:0005737~cytoplasm,GO:0005739~mitochondrion,GO:0005765~lysosomal membrane,GO:0005829~cytosol,GO:0005913~cell-cell adherens junction,GO:0008180~COP9 signalosome,GO:0009986~cell surface,GO:0016020~membrane,GO:0016234~inclusion body,GO:0016323~basolateral plasma membrane,GO:0016324~apical plasma membrane,GO:0031526~brush border membrane,GO:0034751~aryl hyd…	GO:0001948~glycoprotein binding,GO:0002134~UTP binding,GO:0002135~CTP binding,GO:0003725~double-stranded RNA binding,GO:0005515~protein binding,GO:0005524~ATP binding,GO:0005525~GTP binding,GO:0008144~drug binding,GO:0017098~sulfonylurea receptor binding,GO:0019887~protein kinase regulator activity,GO:0019900~kinase binding,GO:0019901~protein kinase binding,GO:0023026~MHC class II protein complex…	hsa04141:Protein processing in endoplasmic reticulum,hsa04151:PI3K-Akt signaling pathway,hsa04612:Antigen processing and presentation,hsa04621:NOD-like receptor signaling pathway,hsa04914:Progesterone-mediated oocyte maturation,hsa04915:Estrogen signaling pathway,hsa05200:Pathways in cancer,hsa05215:Prostate cancer,
P56199	ITGA1	0.00301059	GO:0000187~activation of MAPK activity,GO:0006936~muscle contraction,GO:0007160~cell-matrix adhesion,GO:0007229~integrin-mediated signaling pathway,GO:0008285~negative regulation of cell proliferation,GO:0030198~extracellular matrix organization,GO:0030593~neutrophil chemotaxis,GO:0032516~positive regulation of phosphoprotein phosphatase activity,GO:0042059~negative regulation of epidermal growth…	GO:0001669~acrosomal vesicle,GO:0005886~plasma membrane,GO:0005925~focal adhesion,GO:0008305~integrin complex,GO:0009897~external side of plasma membrane,GO:0009986~cell surface,GO:0016020~membrane,GO:0034665~integrin alpha1-beta1 complex,GO:0043005~neuron projection,GO:0043204~perikaryon,GO:0045121~membrane raft,GO:0045178~basal part of cell,GO:0070062~extracellular exosome,	GO:0005102~receptor binding,GO:0005515~protein binding,GO:0005518~collagen binding,GO:0019903~protein phosphatase binding,GO:0046872~metal ion binding,GO:0098639~collagen binding involved in cell-matrix adhesion,	hsa04151:PI3K-Akt signaling pathway,hsa04510:Focal adhesion,hsa04512:ECM-receptor interaction,hsa04640:Hematopoietic cell lineage,hsa04810:Regulation of actin cytoskeleton,hsa05410:Hypertrophic cardiomyopathy (HCM),hsa05412:Arrhythmogenic right ventricular cardiomyopathy (ARVC),hsa05414:Dilated cardiomyopathy,
A0A3B3IU79	ITGA2B	0.000421421	GO:0002576~platelet degranulation,GO:0002687~positive regulation of leukocyte migration,GO:0007155~cell adhesion,GO:0007160~cell-matrix adhesion,GO:0007229~integrin-mediated signaling pathway,GO:0030198~extracellular matrix organization,GO:0070527~platelet aggregation,	GO:0005886~plasma membrane,GO:0005887~integral component of plasma membrane,GO:0005925~focal adhesion,GO:0008305~integrin complex,GO:0009897~external side of plasma membrane,GO:0009986~cell surface,GO:0031092~platelet alpha granule membrane,GO:0070062~extracellular exosome,GO:0072562~blood microparticle,	GO:0005515~protein binding,GO:0042802~identical protein binding,GO:0046872~metal ion binding,GO:0050840~extracellular matrix binding,GO:0070051~fibrinogen binding,	hsa04015:Rap1 signaling pathway,hsa04151:PI3K-Akt signaling pathway,hsa04510:Focal adhesion,hsa04512:ECM-receptor interaction,hsa04611:Platelet activation,hsa04640:Hematopoietic cell lineage,hsa04810:Regulation of actin cytoskeleton,hsa05200:Pathways in cancer,hsa05222:Small cell lung cancer,hsa05410:Hypertrophic cardiomyopathy (HCM),hsa05412:Arrhythmogenic right ventricular cardiomyopathy (ARVC)…
P23229	ITGA6	0.00577023	GO:0007044~cell-substrate junction assembly,GO:0007155~cell adhesion,GO:0007160~cell-matrix adhesion,GO:0007229~integrin-mediated signaling pathway,GO:0010668~ectodermal cell differentiation,GO:0010811~positive regulation of cell-substrate adhesion,GO:0016337~single organismal cell-cell adhesion,GO:0022409~positive regulation of cell-cell adhesion,GO:0030198~extracellular matrix organization,GO:0…	GO:0005604~basement membrane,GO:0005886~plasma membrane,GO:0005913~cell-cell adherens junction,GO:0005925~focal adhesion,GO:0008305~integrin complex,GO:0009897~external side of plasma membrane,GO:0009925~basal plasma membrane,GO:0009986~cell surface,GO:0016021~integral component of membrane,GO:0030056~hemidesmosome,GO:0030175~filopodium,GO:0034676~integrin alpha6-beta4 complex,	GO:0005178~integrin binding,GO:0005515~protein binding,GO:0031994~insulin-like growth factor I binding,GO:0038132~neuregulin binding,GO:0043236~laminin binding,GO:0046872~metal ion binding,GO:0098641~cadherin binding involved in cell-cell adhesion,	hsa04151:PI3K-Akt signaling pathway,hsa04510:Focal adhesion,hsa04512:ECM-receptor interaction,hsa04514:Cell adhesion molecules (CAMs),hsa04640:Hematopoietic cell lineage,hsa04810:Regulation of actin cytoskeleton,hsa05145:Toxoplasmosis,hsa05200:Pathways in cancer,hsa05222:Small cell lung cancer,hsa05410:Hypertrophic cardiomyopathy (HCM),hsa05412:Arrhythmogenic right ventricular cardiomyopathy (ARV…
P06756	ITGAV	0.0163785	GO:0001525~angiogenesis,GO:0001568~blood vessel development,GO:0002479~antigen processing and presentation of exogenous peptide antigen via MHC class I, TAP-dependent,GO:0007155~cell adhesion,GO:0007160~cell-matrix adhesion,GO:0007229~integrin-mediated signaling pathway,GO:0008284~positive regulation of cell proliferation,GO:0010745~negative regulation of macrophage derived foam cell differentiat…	GO:0005622~intracellular,GO:0005886~plasma membrane,GO:0005887~integral component of plasma membrane,GO:0005925~focal adhesion,GO:0008305~integrin complex,GO:0009897~external side of plasma membrane,GO:0009986~cell surface,GO:0016020~membrane,GO:0031258~lamellipodium membrane,GO:0031527~filopodium membrane,GO:0031528~microvillus membrane,GO:0032587~ruffle membrane,GO:0034683~integrin alphav-beta3…	GO:0001618~virus receptor activity,GO:0001846~opsonin binding,GO:0001968~fibronectin binding,GO:0002020~protease binding,GO:0005080~protein kinase C binding,GO:0005245~voltage-gated calcium channel activity,GO:0005515~protein binding,GO:0015026~coreceptor activity,GO:0017134~fibroblast growth factor binding,GO:0019960~C-X3-C chemokine binding,GO:0031994~insulin-like growth factor I binding,GO:003…	hsa04145:Phagosome,hsa04151:PI3K-Akt signaling pathway,hsa04510:Focal adhesion,hsa04512:ECM-receptor interaction,hsa04514:Cell adhesion molecules (CAMs),hsa04810:Regulation of actin cytoskeleton,hsa04919:Thyroid hormone signaling pathway,hsa05200:Pathways in cancer,hsa05205:Proteoglycans in cancer,hsa05222:Small cell lung cancer,hsa05410:Hypertrophic cardiomyopathy (HCM),hsa05412:Arrhythmogenic r…
P05556	ITGB1	0.0115921	GO:0000082~G1/S transition of mitotic cell cycle,GO:0001701~in utero embryonic development,GO:0001708~cell fate specification,GO:0002042~cell migration involved in sprouting angiogenesis,GO:0006968~cellular defense response,GO:0007156~homophilic cell adhesion via plasma membrane adhesion molecules,GO:0007159~leukocyte cell-cell adhesion,GO:0007160~cell-matrix adhesion,GO:0007161~calcium-independe…	GO:0001726~ruffle,GO:0005737~cytoplasm,GO:0005886~plasma membrane,GO:0005913~cell-cell adherens junction,GO:0005925~focal adhesion,GO:0008305~integrin complex,GO:0009897~external side of plasma membrane,GO:0009986~cell surface,GO:0014704~intercalated disc,GO:0016020~membrane,GO:0030027~lamellipodium,GO:0030175~filopodium,GO:0031594~neuromuscular junction,GO:0032154~cleavage furrow,GO:0032587~ruff…	GO:0001618~virus receptor activity,GO:0001968~fibronectin binding,GO:0002020~protease binding,GO:0003779~actin binding,GO:0004872~receptor activity,GO:0005178~integrin binding,GO:0005515~protein binding,GO:0015026~coreceptor activity,GO:0019960~C-X3-C chemokine binding,GO:0032403~protein complex binding,GO:0043236~laminin binding,GO:0046872~metal ion binding,GO:0046982~protein heterodimerization …	hsa04015:Rap1 signaling pathway,hsa04145:Phagosome,hsa04151:PI3K-Akt signaling pathway,hsa04360:Axon guidance,hsa04510:Focal adhesion,hsa04512:ECM-receptor interaction,hsa04514:Cell adhesion molecules (CAMs),hsa04611:Platelet activation,hsa04670:Leukocyte transendothelial migration,hsa04810:Regulation of actin cytoskeleton,hsa05100:Bacterial invasion of epithelial cells,hsa05130:Pathogenic Escher…
D3DSM0	ITGB2	0.000362685	GO:0002523~leukocyte migration involved in inflammatory response,GO:0006909~phagocytosis,GO:0006915~apoptotic process,GO:0006954~inflammatory response,GO:0007155~cell adhesion,GO:0007159~leukocyte cell-cell adhesion,GO:0007160~cell-matrix adhesion,GO:0007229~integrin-mediated signaling pathway,GO:0007267~cell-cell signaling,GO:0007568~aging,GO:0008360~regulation of cell shape,GO:0030101~natural k…	GO:0005886~plasma membrane,GO:0008305~integrin complex,GO:0009986~cell surface,GO:0016020~membrane,GO:0034687~integrin alphaL-beta2 complex,GO:0043235~receptor complex,GO:0070062~extracellular exosome,GO:1903561~extracellular vesicle,	GO:0001948~glycoprotein binding,GO:0004872~receptor activity,GO:0005515~protein binding,GO:0019901~protein kinase binding,GO:0030369~ICAM-3 receptor activity,GO:0032403~protein complex binding,GO:0046872~metal ion binding,GO:0046982~protein heterodimerization activity,GO:0050839~cell adhesion molecule binding,	hsa04015:Rap1 signaling pathway,hsa04145:Phagosome,hsa04390:Hippo signaling pathway,hsa04514:Cell adhesion molecules (CAMs),hsa04650:Natural killer cell mediated cytotoxicity,hsa04670:Leukocyte transendothelial migration,hsa04810:Regulation of actin cytoskeleton,hsa05133:Pertussis,hsa05134:Legionellosis,hsa05140:Leishmaniasis,hsa05144:Malaria,hsa05146:Amoebiasis,hsa05150:Staphylococcus aureus inf…
P16144	ITGB4	0.0126597	GO:0006914~autophagy,GO:0007155~cell adhesion,GO:0007160~cell-matrix adhesion,GO:0007229~integrin-mediated signaling pathway,GO:0009611~response to wounding,GO:0030198~extracellular matrix organization,GO:0031581~hemidesmosome assembly,GO:0035878~nail development,GO:0043588~skin development,GO:0048333~mesodermal cell differentiation,GO:0048565~digestive tract development,GO:0048870~cell motility,…	GO:0005634~nucleus,GO:0005886~plasma membrane,GO:0008305~integrin complex,GO:0009986~cell surface,GO:0030054~cell junction,GO:0030056~hemidesmosome,GO:0031252~cell leading edge,GO:0043235~receptor complex,GO:0070062~extracellular exosome,	GO:0001664~G-protein coupled receptor binding,GO:0004872~receptor activity,GO:0005515~protein binding,GO:0031994~insulin-like growth factor I binding,GO:0038132~neuregulin binding,	hsa04151:PI3K-Akt signaling pathway,hsa04510:Focal adhesion,hsa04512:ECM-receptor interaction,hsa04810:Regulation of actin cytoskeleton,hsa05410:Hypertrophic cardiomyopathy (HCM),hsa05412:Arrhythmogenic right ventricular cardiomyopathy (ARVC),hsa05414:Dilated cardiomyopathy,
Q14847	LASP1	0.197026	GO:0006811~ion transport,GO:0009967~positive regulation of signal transduction,GO:0034220~ion transmembrane transport,GO:0098609~cell-cell adhesion,	GO:0005737~cytoplasm,GO:0005913~cell-cell adherens junction,GO:0005925~focal adhesion,GO:0030864~cortical actin cytoskeleton,GO:0070062~extracellular exosome,	GO:0005070~SH3/SH2 adaptor activity,GO:0005515~protein binding,GO:0008270~zinc ion binding,GO:0015075~ion transmembrane transporter activity,GO:0051015~actin filament binding,GO:0098641~cadherin binding involved in cell-cell adhesion,
Q9UHB6	LIMA1	0.424398	GO:0030835~negative regulation of actin filament depolymerization,GO:0031529~ruffle organization,GO:0051017~actin filament bundle assembly,GO:0098609~cell-cell adhesion,	GO:0001725~stress fiber,GO:0005737~cytoplasm,GO:0005886~plasma membrane,GO:0005903~brush border,GO:0005913~cell-cell adherens junction,GO:0005925~focal adhesion,GO:0015629~actin cytoskeleton,GO:0032154~cleavage furrow,	GO:0003785~actin monomer binding,GO:0005515~protein binding,GO:0008270~zinc ion binding,GO:0051015~actin filament binding,GO:0098641~cadherin binding involved in cell-cell adhesion,
Q9NUP9	LIN7C	0.0017227	GO:0002011~morphogenesis of an epithelial sheet,GO:0006887~exocytosis,GO:0007269~neurotransmitter secretion,GO:0015031~protein transport,GO:0045199~maintenance of epithelial cell apical/basal polarity,GO:1903361~protein localization to basolateral plasma membrane,	GO:0005737~cytoplasm,GO:0005886~plasma membrane,GO:0005911~cell-cell junction,GO:0005923~bicellular tight junction,GO:0014069~postsynaptic density,GO:0016323~basolateral plasma membrane,GO:0043005~neuron projection,GO:0045211~postsynaptic membrane,GO:0070062~extracellular exosome,GO:0097025~MPP7-DLG1-LIN7 complex,GO:0098793~presynapse,	GO:0008092~cytoskeletal protein binding,GO:0019904~protein domain specific binding,GO:0030165~PDZ domain binding,GO:0097016~L27 domain binding,
S4R337	MPP7	0.665262	GO:0009967~positive regulation of signal transduction,GO:0030010~establishment of cell polarity,GO:0031334~positive regulation of protein complex assembly,GO:0070830~bicellular tight junction assembly,GO:0071896~protein localization to adherens junction,GO:0098609~cell-cell adhesion,	GO:0005912~adherens junction,GO:0005913~cell-cell adherens junction,GO:0005923~bicellular tight junction,GO:0097025~MPP7-DLG1-LIN7 complex,	GO:0005515~protein binding,GO:0019904~protein domain specific binding,GO:0032947~protein complex scaffold,GO:0035591~signaling adaptor activity,GO:0046982~protein heterodimerization activity,GO:0098641~cadherin binding involved in cell-cell adhesion,
P25325	MPST	0.000819003	GO:0001822~kidney development,GO:0001889~liver development,GO:0009440~cyanate catabolic process,GO:0009636~response to toxic substance,GO:0019346~transsulfuration,GO:0021510~spinal cord development,GO:0070814~hydrogen sulfide biosynthetic process,	GO:0005739~mitochondrion,GO:0005829~cytosol,GO:0030054~cell junction,GO:0043005~neuron projection,GO:0045202~synapse,GO:0070062~extracellular exosome,	GO:0004792~thiosulfate sulfurtransferase activity,GO:0016784~3-mercaptopyruvate sulfurtransferase activity,GO:0042802~identical protein binding,	hsa00270:Cysteine and methionine metabolism,hsa00920:Sulfur metabolism,hsa01100:Metabolic pathways,hsa04122:Sulfur relay system,
Q15746	MYLK	3.32358e-07	GO:0006468~protein phosphorylation,GO:0006936~muscle contraction,GO:0006939~smooth muscle contraction,GO:0014820~tonic smooth muscle contraction,GO:0030335~positive regulation of cell migration,GO:0032060~bleb assembly,GO:0051928~positive regulation of calcium ion transport,GO:0060414~aorta smooth muscle tissue morphogenesis,GO:0071476~cellular hypotonic response,GO:0090303~positive regulation of…	GO:0001725~stress fiber,GO:0005737~cytoplasm,GO:0005829~cytosol,GO:0030027~lamellipodium,GO:0032154~cleavage furrow,GO:0070062~extracellular exosome,	GO:0003779~actin binding,GO:0004687~myosin light chain kinase activity,GO:0005515~protein binding,GO:0005516~calmodulin binding,GO:0005524~ATP binding,GO:0016301~kinase activity,GO:0046872~metal ion binding,	hsa04020:Calcium signaling pathway,hsa04022:cGMP-PKG signaling pathway,hsa04270:Vascular smooth muscle contraction,hsa04510:Focal adhesion,hsa04611:Platelet activation,hsa04810:Regulation of actin cytoskeleton,hsa04921:Oxytocin signaling pathway,hsa04971:Gastric acid secretion,
H7BYX6	NCAM1	0.0015515	GO:0000165~MAPK cascade,GO:0007155~cell adhesion,GO:0007411~axon guidance,GO:0031175~neuron projection development,GO:0043547~positive regulation of GTPase activity,GO:0046718~viral entry into host cell,GO:0048167~regulation of synaptic plasticity,GO:0060333~interferon-gamma-mediated signaling pathway,	GO:0000139~Golgi membrane,GO:0005737~cytoplasm,GO:0005886~plasma membrane,GO:0009897~external side of plasma membrane,GO:0009986~cell surface,GO:0016020~membrane,GO:0016021~integral component of membrane,GO:0031225~anchored component of membrane,GO:0070062~extracellular exosome,	GO:0001618~virus receptor activity,GO:0005088~Ras guanyl-nucleotide exchange factor activity,	hsa04514:Cell adhesion molecules (CAMs),hsa05020:Prion diseases,
Q99519	NEU1	0.105695	GO:0006687~glycosphingolipid metabolic process,GO:0006689~ganglioside catabolic process,GO:0009313~oligosaccharide catabolic process,	GO:0005764~lysosome,GO:0005765~lysosomal membrane,GO:0005886~plasma membrane,GO:0016020~membrane,GO:0016021~integral component of membrane,GO:0016023~cytoplasmic, membrane-bounded vesicle,GO:0030054~cell junction,GO:0031410~cytoplasmic vesicle,GO:0043202~lysosomal lumen,GO:0043231~intracellular membrane-bounded organelle,GO:0070062~extracellular exosome,	GO:0004308~exo-alpha-sialidase activity,GO:0052794~exo-alpha-(2->3)-sialidase activity,GO:0052795~exo-alpha-(2->6)-sialidase activity,GO:0052796~exo-alpha-(2->8)-sialidase activity,	hsa00511:Other glycan degradation,hsa00600:Sphingolipid metabolism,hsa04142:Lysosome,
H7BXY5	NEXN	0.782028	GO:0030334~regulation of cell migration,GO:0048739~cardiac muscle fiber development,GO:0051493~regulation of cytoskeleton organization,	GO:0005856~cytoskeleton,GO:0005925~focal adhesion,GO:0030018~Z disc,	GO:0008307~structural constituent of muscle,GO:0051015~actin filament binding,
P30419	NMT1	0.0697909	GO:0001701~in utero embryonic development,GO:0006499~N-terminal protein myristoylation,GO:0018008~N-terminal peptidyl-glycine N-myristoylation,GO:0022400~regulation of rhodopsin mediated signaling pathway,GO:1900740~positive regulation of protein insertion into mitochondrial membrane involved in apoptotic signaling pathway,	GO:0005737~cytoplasm,GO:0005739~mitochondrion,GO:0005829~cytosol,GO:0005886~plasma membrane,GO:0015629~actin cytoskeleton,GO:0019898~extrinsic component of membrane,GO:0030054~cell junction,	GO:0004379~glycylpeptide N-tetradecanoyltransferase activity,GO:0019107~myristoyltransferase activity,
Q9NP85	NPHS2	0.654505	GO:0007588~excretion,GO:0031532~actin cytoskeleton reorganization,GO:0072249~metanephric glomerular visceral epithelial cell development,	GO:0005783~endoplasmic reticulum,GO:0005886~plasma membrane,GO:0005887~integral component of plasma membrane,GO:0005911~cell-cell junction,GO:0031235~intrinsic component of the cytoplasmic side of the plasma membrane,GO:0036057~slit diaphragm,GO:0043234~protein complex,GO:0045121~membrane raft,GO:0070062~extracellular exosome,	GO:0005515~protein binding,
F5H7V1	NRDC	0.0142836	GO:0006508~proteolysis,GO:0007528~neuromuscular junction development,GO:0008283~cell proliferation,GO:0016477~cell migration,GO:0016485~protein processing,GO:0051044~positive regulation of membrane protein ectodomain proteolysis,GO:0052548~regulation of endopeptidase activity,	GO:0005739~mitochondrion,GO:0005829~cytosol,GO:0009986~cell surface,	GO:0003824~catalytic activity,GO:0004222~metalloendopeptidase activity,GO:0005515~protein binding,GO:0008270~zinc ion binding,GO:0046872~metal ion binding,GO:0048408~epidermal growth factor binding,
A0A0G2JMZ8	OCLN	0.44762	GO:0006461~protein complex assembly,GO:0045216~cell-cell junction organization,GO:0070830~bicellular tight junction assembly,	GO:0005886~plasma membrane,GO:0005911~cell-cell junction,GO:0005923~bicellular tight junction,GO:0016021~integral component of membrane,GO:0016324~apical plasma membrane,GO:0016327~apicolateral plasma membrane,GO:0030054~cell junction,GO:0030139~endocytic vesicle,GO:0031410~cytoplasmic vesicle,	GO:0005515~protein binding,GO:0019904~protein domain specific binding,	hsa04514:Cell adhesion molecules (CAMs),hsa04530:Tight junction,hsa04670:Leukocyte transendothelial migration,hsa05130:Pathogenic Escherichia coli infection,hsa05160:Hepatitis C,
Q8WUM4	PDCD6IP	0.189459	GO:0000920~cell separation after cytokinesis,GO:0006915~apoptotic process,GO:0006997~nucleus organization,GO:0007049~cell cycle,GO:0007080~mitotic metaphase plate congression,GO:0010824~regulation of centrosome duplication,GO:0015031~protein transport,GO:0019058~viral life cycle,GO:0036258~multivesicular body assembly,GO:0039702~viral budding via host ESCRT complex,GO:0090611~ubiquitin-independen…	GO:0001772~immunological synapse,GO:0005737~cytoplasm,GO:0005815~microtubule organizing center,GO:0005829~cytosol,GO:0005925~focal adhesion,GO:0016020~membrane,GO:0042470~melanosome,GO:0043209~myelin sheath,GO:0070062~extracellular exosome,GO:0070971~endoplasmic reticulum exit site,GO:1903561~extracellular vesicle,	GO:0005515~protein binding,GO:0031871~proteinase activated receptor binding,GO:0042803~protein homodimerization activity,GO:0048306~calcium-dependent protein binding,	hsa04144:Endocytosis,
P13667	PDIA4	0.105858	GO:0006457~protein folding,GO:0009306~protein secretion,GO:0034976~response to endoplasmic reticulum stress,GO:0045454~cell redox homeostasis,GO:0061077~chaperone-mediated protein folding,	GO:0005623~cell,GO:0005788~endoplasmic reticulum lumen,GO:0009986~cell surface,GO:0042470~melanosome,	GO:0003756~protein disulfide isomerase activity,GO:0005515~protein binding,GO:0044822~poly(A) RNA binding,	hsa04141:Protein processing in endoplasmic reticulum,hsa04918:Thyroid hormone synthesis,hsa05110:Vibrio cholerae infection,
Q96HC4	PDLIM5	0.00402353	GO:0051963~regulation of synapse assembly,GO:0061001~regulation of dendritic spine morphogenesis,GO:0061049~cell growth involved in cardiac muscle cell development,GO:0098609~cell-cell adhesion,	GO:0005737~cytoplasm,GO:0005829~cytosol,GO:0005913~cell-cell adherens junction,GO:0014069~postsynaptic density,GO:0015629~actin cytoskeleton,GO:0016020~membrane,GO:0043005~neuron projection,GO:0045211~postsynaptic membrane,	GO:0003779~actin binding,GO:0005080~protein kinase C binding,GO:0005515~protein binding,GO:0008270~zinc ion binding,GO:0042805~actinin binding,GO:0047485~protein N-terminus binding,GO:0098641~cadherin binding involved in cell-cell adhesion,
Q15124	PGM5	1.01965e-05	GO:0005975~carbohydrate metabolic process,GO:0005978~glycogen biosynthetic process,GO:0006006~glucose metabolic process,GO:0007155~cell adhesion,GO:0019388~galactose catabolic process,	GO:0001725~stress fiber,GO:0005829~cytosol,GO:0005913~cell-cell adherens junction,GO:0005914~spot adherens junction,GO:0005925~focal adhesion,GO:0009898~cytoplasmic side of plasma membrane,GO:0014704~intercalated disc,GO:0016010~dystrophin-associated glycoprotein complex,GO:0030018~Z disc,GO:0042383~sarcolemma,GO:0043034~costamere,	GO:0000287~magnesium ion binding,GO:0004614~phosphoglucomutase activity,GO:0005198~structural molecule activity,GO:0016868~intramolecular transferase activity, phosphotransferases,
Q15149	PLEC	0.000927039	GO:0031581~hemidesmosome assembly,GO:0098609~cell-cell adhesion,	GO:0005737~cytoplasm,GO:0005829~cytosol,GO:0005856~cytoskeleton,GO:0005886~plasma membrane,GO:0005903~brush border,GO:0005913~cell-cell adherens junction,GO:0005925~focal adhesion,GO:0016528~sarcoplasm,GO:0030056~hemidesmosome,GO:0031012~extracellular matrix,GO:0042383~sarcolemma,GO:0043034~costamere,GO:0045111~intermediate filament cytoskeleton,GO:0070062~extracellular exosome,	GO:0003779~actin binding,GO:0005515~protein binding,GO:0008307~structural constituent of muscle,GO:0030506~ankyrin binding,GO:0044822~poly(A) RNA binding,GO:0098641~cadherin binding involved in cell-cell adhesion,
Q13308	PTK7	0.00426438	GO:0001736~establishment of planar polarity,GO:0003281~ventricular septum development,GO:0003401~axis elongation,GO:0006468~protein phosphorylation,GO:0007155~cell adhesion,GO:0007165~signal transduction,GO:0010976~positive regulation of neuron projection development,GO:0016477~cell migration,GO:0031532~actin cytoskeleton reorganization,GO:0042060~wound healing,GO:0045198~establishment of epithel…	GO:0005887~integral component of plasma membrane,GO:0005911~cell-cell junction,GO:0005925~focal adhesion,	GO:0004672~protein kinase activity,GO:0005515~protein binding,GO:0005524~ATP binding,GO:1904929~coreceptor activity involved in Wnt signaling pathway, planar cell polarity pathway,
P08575	PTPRC	1.5114e-05	GO:0001915~negative regulation of T cell mediated cytotoxicity,GO:0001960~negative regulation of cytokine-mediated signaling pathway,GO:0002244~hematopoietic progenitor cell differentiation,GO:0002378~immunoglobulin biosynthetic process,GO:0006469~negative regulation of protein kinase activity,GO:0006470~protein dephosphorylation,GO:0006933~negative regulation of cell adhesion involved in substra…	GO:0005886~plasma membrane,GO:0005887~integral component of plasma membrane,GO:0005925~focal adhesion,GO:0009897~external side of plasma membrane,GO:0009986~cell surface,GO:0016020~membrane,GO:0016021~integral component of membrane,GO:0045121~membrane raft,GO:0070062~extracellular exosome,	GO:0004725~protein tyrosine phosphatase activity,GO:0005001~transmembrane receptor protein tyrosine phosphatase activity,GO:0005515~protein binding,GO:0019901~protein kinase binding,	hsa04514:Cell adhesion molecules (CAMs),hsa04660:T cell receptor signaling pathway,hsa04666:Fc gamma R-mediated phagocytosis,hsa05340:Primary immunodeficiency,
Q15262	PTPRK	0.117728	GO:0006470~protein dephosphorylation,GO:0007155~cell adhesion,GO:0007165~signal transduction,GO:0007179~transforming growth factor beta receptor signaling pathway,GO:0008285~negative regulation of cell proliferation,GO:0010839~negative regulation of keratinocyte proliferation,GO:0016477~cell migration,GO:0030336~negative regulation of cell migration,GO:0031175~neuron projection development,GO:003…	GO:0001750~photoreceptor outer segment,GO:0005887~integral component of plasma membrane,GO:0005911~cell-cell junction,GO:0005912~adherens junction,GO:0009986~cell surface,GO:0016020~membrane,GO:0016021~integral component of membrane,GO:0030424~axon,GO:0030425~dendrite,GO:0031256~leading edge membrane,GO:0043025~neuronal cell body,	GO:0004725~protein tyrosine phosphatase activity,GO:0005001~transmembrane receptor protein tyrosine phosphatase activity,GO:0005515~protein binding,GO:0008013~beta-catenin binding,GO:0019901~protein kinase binding,GO:0045295~gamma-catenin binding,
Q15907	RAB11B	0.0216584	GO:0001881~receptor recycling,GO:0007264~small GTPase mediated signal transduction,GO:0032402~melanosome transport,GO:0033572~transferrin transport,GO:0035773~insulin secretion involved in cellular response to glucose stimulus,GO:0044070~regulation of anion transport,GO:0045054~constitutive secretory pathway,GO:0045055~regulated exocytosis,GO:0071468~cellular response to acidic pH,GO:0090150~esta…	GO:0005622~intracellular,GO:0005739~mitochondrion,GO:0005815~microtubule organizing center,GO:0005886~plasma membrane,GO:0005913~cell-cell adherens junction,GO:0008021~synaptic vesicle,GO:0016235~aggresome,GO:0030054~cell junction,GO:0030670~phagocytic vesicle membrane,GO:0030672~synaptic vesicle membrane,GO:0045335~phagocytic vesicle,GO:0055037~recycling endosome,GO:0055038~recycling endosome me…	GO:0003924~GTPase activity,GO:0005515~protein binding,GO:0005525~GTP binding,GO:0019003~GDP binding,GO:0031489~myosin V binding,GO:0098641~cadherin binding involved in cell-cell adhesion,	hsa04144:Endocytosis,hsa04152:AMPK signaling pathway,hsa04962:Vasopressin-regulated water reabsorption,
P11233	RALA	0.0327184	GO:0000910~cytokinesis,GO:0001843~neural tube closure,GO:0006887~exocytosis,GO:0006935~chemotaxis,GO:0007165~signal transduction,GO:0007265~Ras protein signal transduction,GO:0016032~viral process,GO:0017157~regulation of exocytosis,GO:0031532~actin cytoskeleton reorganization,GO:0051491~positive regulation of filopodium assembly,GO:0051665~membrane raft localization,GO:0061024~membrane organizat…	GO:0005622~intracellular,GO:0005886~plasma membrane,GO:0005925~focal adhesion,GO:0009986~cell surface,GO:0030139~endocytic vesicle,GO:0030496~midbody,GO:0030659~cytoplasmic vesicle membrane,GO:0032154~cleavage furrow,GO:0043209~myelin sheath,GO:0070062~extracellular exosome,	GO:0003924~GTPase activity,GO:0005515~protein binding,GO:0005525~GTP binding,GO:0017022~myosin binding,GO:0019003~GDP binding,GO:0031625~ubiquitin protein ligase binding,GO:0031755~Edg-2 lysophosphatidic acid receptor binding,GO:0051117~ATPase binding,	hsa04014:Ras signaling pathway,hsa04015:Rap1 signaling pathway,hsa05200:Pathways in cancer,hsa05212:Pancreatic cancer,
P62834	RAP1A	0.0753985	GO:0000186~activation of MAPKK activity,GO:0007165~signal transduction,GO:0007264~small GTPase mediated signal transduction,GO:0010976~positive regulation of neuron projection development,GO:0015031~protein transport,GO:0030033~microvillus assembly,GO:0032486~Rap protein signal transduction,GO:0032966~negative regulation of collagen biosynthetic process,GO:0035690~cellular response to drug,GO:003…	GO:0005622~intracellular,GO:0005737~cytoplasm,GO:0005769~early endosome,GO:0005770~late endosome,GO:0005829~cytosol,GO:0005886~plasma membrane,GO:0016020~membrane,GO:0030054~cell junction,GO:0032045~guanyl-nucleotide exchange factor complex,GO:0043005~neuron projection,GO:0043209~myelin sheath,GO:0048471~perinuclear region of cytoplasm,GO:0070062~extracellular exosome,	GO:0003924~GTPase activity,GO:0005515~protein binding,GO:0005525~GTP binding,GO:0008565~protein transporter activity,GO:0017016~Ras GTPase binding,GO:0017034~Rap guanyl-nucleotide exchange factor activity,GO:0032403~protein complex binding,	hsa04010:MAPK signaling pathway,hsa04014:Ras signaling pathway,hsa04015:Rap1 signaling pathway,hsa04024:cAMP signaling pathway,hsa04062:Chemokine signaling pathway,hsa04510:Focal adhesion,hsa04611:Platelet activation,hsa04670:Leukocyte transendothelial migration,hsa04720:Long-term potentiation,hsa04722:Neurotrophin signaling pathway,hsa04972:Pancreatic secretion,hsa05211:Renal cell carcinoma,
P61224	RAP1B	0.0379452	GO:0007264~small GTPase mediated signal transduction,GO:0008283~cell proliferation,GO:0009743~response to carbohydrate,GO:0030033~microvillus assembly,GO:0032486~Rap protein signal transduction,GO:0035690~cellular response to drug,GO:0061028~establishment of endothelial barrier,GO:0070374~positive regulation of ERK1 and ERK2 cascade,GO:0071320~cellular response to cAMP,GO:0071407~cellular respons…	GO:0005622~intracellular,GO:0005811~lipid particle,GO:0005829~cytosol,GO:0005886~plasma membrane,GO:0005911~cell-cell junction,GO:0016020~membrane,GO:0045121~membrane raft,GO:0070062~extracellular exosome,	GO:0003924~GTPase activity,GO:0005515~protein binding,GO:0005525~GTP binding,GO:0019003~GDP binding,GO:0032403~protein complex binding,	hsa04010:MAPK signaling pathway,hsa04014:Ras signaling pathway,hsa04015:Rap1 signaling pathway,hsa04024:cAMP signaling pathway,hsa04062:Chemokine signaling pathway,hsa04510:Focal adhesion,hsa04611:Platelet activation,hsa04670:Leukocyte transendothelial migration,hsa04720:Long-term potentiation,hsa04722:Neurotrophin signaling pathway,hsa04972:Pancreatic secretion,hsa05211:Renal cell carcinoma,
Q5T093	RER1	0.00327417	GO:0006890~retrograde vesicle-mediated transport, Golgi to ER,GO:0071340~skeletal muscle acetylcholine-gated channel clustering,GO:0090004~positive regulation of establishment of protein localization to plasma membrane,	GO:0005793~endoplasmic reticulum-Golgi intermediate compartment,GO:0005794~Golgi apparatus,GO:0005886~plasma membrane,GO:0009986~cell surface,GO:0016021~integral component of membrane,GO:0030173~integral component of Golgi membrane,	GO:0033130~acetylcholine receptor binding,
P61586	RHOA	0.00061688	GO:0007179~transforming growth factor beta receptor signaling pathway,GO:0007264~small GTPase mediated signal transduction,GO:0007266~Rho protein signal transduction,GO:0016032~viral process,GO:0016477~cell migration,GO:0021762~substantia nigra development,GO:0030036~actin cytoskeleton organization,GO:0030168~platelet activation,GO:0030334~regulation of cell migration,GO:0031532~actin cytoskeleto…	GO:0005622~intracellular,GO:0005768~endosome,GO:0005789~endoplasmic reticulum membrane,GO:0005829~cytosol,GO:0005856~cytoskeleton,GO:0005886~plasma membrane,GO:0005925~focal adhesion,GO:0005938~cell cortex,GO:0030027~lamellipodium,GO:0030054~cell junction,GO:0030496~midbody,GO:0031234~extrinsic component of cytoplasmic side of plasma membrane,GO:0031982~vesicle,GO:0032154~cleavage furrow,GO:00432…	GO:0003924~GTPase activity,GO:0005515~protein binding,GO:0005525~GTP binding,GO:0017022~myosin binding,	hsa04014:Ras signaling pathway,hsa04015:Rap1 signaling pathway,hsa04022:cGMP-PKG signaling pathway,hsa04024:cAMP signaling pathway,hsa04062:Chemokine signaling pathway,hsa04071:Sphingolipid signaling pathway,hsa04144:Endocytosis,hsa04270:Vascular smooth muscle contraction,hsa04310:Wnt signaling pathway,hsa04350:TGF-beta signaling pathway,hsa04360:Axon guidance,hsa04510:Focal adhesion,hsa04520:Adh…
E9PHH3	SDC1	0.0912368	GO:0001523~retinoid metabolic process,GO:0001657~ureteric bud development,GO:0006024~glycosaminoglycan biosynthetic process,GO:0006027~glycosaminoglycan catabolic process,GO:0006954~inflammatory response,GO:0009636~response to toxic substance,GO:0016477~cell migration,GO:0030203~glycosaminoglycan metabolic process,GO:0042060~wound healing,GO:0042157~lipoprotein metabolic process,GO:0042476~odonto…	GO:0005737~cytoplasm,GO:0005796~Golgi lumen,GO:0005886~plasma membrane,GO:0005887~integral component of plasma membrane,GO:0005925~focal adhesion,GO:0009897~external side of plasma membrane,GO:0009986~cell surface,GO:0016020~membrane,GO:0043202~lysosomal lumen,GO:0043234~protein complex,GO:0070062~extracellular exosome,	GO:0001948~glycoprotein binding,GO:0005515~protein binding,GO:0008022~protein C-terminus binding,	hsa04512:ECM-receptor interaction,hsa04514:Cell adhesion molecules (CAMs),hsa05144:Malaria,hsa05205:Proteoglycans in cancer,
Q99961	SH3GL1	0.000484811	GO:0006897~endocytosis,GO:0007165~signal transduction,GO:0007417~central nervous system development,GO:0098609~cell-cell adhesion,	GO:0002102~podosome,GO:0005737~cytoplasm,GO:0005913~cell-cell adherens junction,GO:0031901~early endosome membrane,GO:0042995~cell projection,	GO:0005515~protein binding,GO:0008289~lipid binding,GO:0019902~phosphatase binding,GO:0042802~identical protein binding,GO:0051020~GTPase binding,GO:0098641~cadherin binding involved in cell-cell adhesion,	hsa04144:Endocytosis,
Q5VSN0	SH3KBP1	0.0101003	GO:0006897~endocytosis,GO:0006915~apoptotic process,GO:0007010~cytoskeleton organization,GO:0007267~cell-cell signaling,GO:0008360~regulation of cell shape,GO:0016477~cell migration,GO:0042059~negative regulation of epidermal growth factor receptor signaling pathway,	GO:0005737~cytoplasm,GO:0005829~cytosol,GO:0005856~cytoskeleton,GO:0005886~plasma membrane,GO:0005911~cell-cell junction,GO:0005925~focal adhesion,GO:0016021~integral component of membrane,GO:0030139~endocytic vesicle,GO:0030659~cytoplasmic vesicle membrane,GO:0043005~neuron projection,GO:0045202~synapse,	GO:0005515~protein binding,GO:0016301~kinase activity,GO:0017124~SH3 domain binding,	hsa04144:Endocytosis,
F5GYF8	SIPA1L1	0.378281	GO:0031532~actin cytoskeleton reorganization,GO:0043087~regulation of GTPase activity,GO:0048013~ephrin receptor signaling pathway,GO:0048167~regulation of synaptic plasticity,GO:0048814~regulation of dendrite morphogenesis,GO:0050770~regulation of axonogenesis,GO:0051056~regulation of small GTPase mediated signal transduction,GO:0061001~regulation of dendritic spine morphogenesis,GO:0090630~acti…	GO:0005737~cytoplasm,GO:0005856~cytoskeleton,GO:0014069~postsynaptic density,GO:0030054~cell junction,GO:0043197~dendritic spine,GO:0045211~postsynaptic membrane,	GO:0005096~GTPase activator activity,GO:0046875~ephrin receptor binding,	hsa04015:Rap1 signaling pathway,
O95721	SNAP29	0.129231	GO:0006887~exocytosis,GO:0006903~vesicle targeting,GO:0015031~protein transport,GO:0016082~synaptic vesicle priming,GO:0031629~synaptic vesicle fusion to presynaptic active zone membrane,GO:0042384~cilium assembly,GO:0060271~cilium morphogenesis,GO:0061025~membrane fusion,GO:0097352~autophagosome maturation,	GO:0000139~Golgi membrane,GO:0000421~autophagosome membrane,GO:0005737~cytoplasm,GO:0005813~centrosome,GO:0005886~plasma membrane,GO:0020018~ciliary pocket membrane,GO:0031201~SNARE complex,GO:0031410~cytoplasmic vesicle,GO:0098793~presynapse,	GO:0005484~SNAP receptor activity,GO:0005515~protein binding,GO:0019905~syntaxin binding,	hsa04130:SNARE interactions in vesicular transport,
Q13425	SNTB2	0.106305		GO:0005737~cytoplasm,GO:0005874~microtubule,GO:0005925~focal adhesion,GO:0016010~dystrophin-associated glycoprotein complex,GO:0016020~membrane,GO:0030658~transport vesicle membrane,GO:0043234~protein complex,GO:0045202~synapse,GO:0070062~extracellular exosome,	GO:0003779~actin binding,GO:0005198~structural molecule activity,GO:0005515~protein binding,GO:0005516~calmodulin binding,GO:0044822~poly(A) RNA binding,
Q13813	SPTAN1	0.00159865	GO:0000165~MAPK cascade,GO:0006888~ER to Golgi vesicle-mediated transport,GO:0007010~cytoskeleton organization,GO:0007411~axon guidance,GO:0043547~positive regulation of GTPase activity,GO:0051693~actin filament capping,GO:0098609~cell-cell adhesion,	GO:0005829~cytosol,GO:0005913~cell-cell adherens junction,GO:0008091~spectrin,GO:0015630~microtubule cytoskeleton,GO:0016020~membrane,GO:0043231~intracellular membrane-bounded organelle,GO:0070062~extracellular exosome,GO:1903561~extracellular vesicle,	GO:0003779~actin binding,GO:0005088~Ras guanyl-nucleotide exchange factor activity,GO:0005200~structural constituent of cytoskeleton,GO:0005509~calcium ion binding,GO:0005515~protein binding,GO:0005516~calmodulin binding,GO:0098641~cadherin binding involved in cell-cell adhesion,
P11277	SPTB	0.000938973	GO:0000165~MAPK cascade,GO:0006888~ER to Golgi vesicle-mediated transport,GO:0007010~cytoskeleton organization,GO:0007411~axon guidance,GO:0043547~positive regulation of GTPase activity,GO:0051693~actin filament capping,	GO:0005737~cytoplasm,GO:0005829~cytosol,GO:0008091~spectrin,GO:0009986~cell surface,GO:0014731~spectrin-associated cytoskeleton,GO:0015629~actin cytoskeleton,GO:0031235~intrinsic component of the cytoplasmic side of the plasma membrane,GO:0043234~protein complex,	GO:0003779~actin binding,GO:0005088~Ras guanyl-nucleotide exchange factor activity,GO:0005200~structural constituent of cytoskeleton,GO:0005515~protein binding,GO:0005543~phospholipid binding,GO:0030506~ankyrin binding,GO:0051015~actin filament binding,
Q9UJZ1	STOML2	0.000470286	GO:0006851~mitochondrial calcium ion transport,GO:0006874~cellular calcium ion homeostasis,GO:0007005~mitochondrion organization,GO:0010876~lipid localization,GO:0010918~positive regulation of mitochondrial membrane potential,GO:0032623~interleukin-2 production,GO:0034982~mitochondrial protein processing,GO:0035710~CD4-positive, alpha-beta T cell activation,GO:0042776~mitochondrial ATP synthesis …	GO:0001772~immunological synapse,GO:0005743~mitochondrial inner membrane,GO:0005758~mitochondrial intermembrane space,GO:0005856~cytoskeleton,GO:0008180~COP9 signalosome,GO:0015629~actin cytoskeleton,GO:0016020~membrane,GO:0019897~extrinsic component of plasma membrane,GO:0042101~T cell receptor complex,GO:0045121~membrane raft,	GO:0005102~receptor binding,GO:0005515~protein binding,GO:0051020~GTPase binding,GO:1901612~cardiolipin binding,
O43815	STRN	0.107913	GO:0007626~locomotory behavior,GO:0008285~negative regulation of cell proliferation,GO:0016055~Wnt signaling pathway,GO:0016358~dendrite development,GO:0070830~bicellular tight junction assembly,	GO:0000159~protein phosphatase type 2A complex,GO:0005737~cytoplasm,GO:0005923~bicellular tight junction,GO:0014069~postsynaptic density,GO:0016020~membrane,GO:0043025~neuronal cell body,GO:0043197~dendritic spine,GO:0045211~postsynaptic membrane,	GO:0005515~protein binding,GO:0005516~calmodulin binding,GO:0030331~estrogen receptor binding,GO:0032403~protein complex binding,GO:0051721~protein phosphatase 2A binding,GO:0070016~armadillo repeat domain binding,
P57105	SYNJ2BP	0.0609583	GO:0001937~negative regulation of endothelial cell proliferation,GO:0002092~positive regulation of receptor internalization,GO:0006605~protein targeting,GO:0007266~Rho protein signal transduction,GO:0008593~regulation of Notch signaling pathway,GO:0010596~negative regulation of endothelial cell migration,GO:0016525~negative regulation of angiogenesis,GO:0030100~regulation of endocytosis,GO:003292…	GO:0005739~mitochondrion,GO:0009986~cell surface,GO:0031307~integral component of mitochondrial outer membrane,	GO:0005515~protein binding,GO:0008022~protein C-terminus binding,
E9PIM6	THY1	0.00042097	GO:0001525~angiogenesis,GO:0006469~negative regulation of protein kinase activity,GO:0007010~cytoskeleton organization,GO:0007155~cell adhesion,GO:0016337~single organismal cell-cell adhesion,GO:0030334~regulation of cell migration,GO:0030336~negative regulation of cell migration,GO:0043547~positive regulation of GTPase activity,GO:0046549~retinal cone cell development,GO:0046777~protein autophos…	GO:0005783~endoplasmic reticulum,GO:0005829~cytosol,GO:0005886~plasma membrane,GO:0005887~integral component of plasma membrane,GO:0005925~focal adhesion,GO:0009897~external side of plasma membrane,GO:0016324~apical plasma membrane,GO:0030425~dendrite,GO:0030426~growth cone,GO:0031362~anchored component of external side of plasma membrane,GO:0043209~myelin sheath,GO:0045121~membrane raft,GO:00700…	GO:0005096~GTPase activator activity,GO:0005178~integrin binding,GO:0005515~protein binding,GO:0019901~protein kinase binding,GO:0034235~GPI anchor binding,	hsa04670:Leukocyte transendothelial migration,
E9PGF5	TNS1	4.37954e-07	GO:0007044~cell-substrate junction assembly,GO:0010761~fibroblast migration,GO:0035556~intracellular signal transduction,	GO:0005622~intracellular,GO:0005737~cytoplasm,GO:0005856~cytoskeleton,GO:0005925~focal adhesion,GO:0009986~cell surface,	GO:0003779~actin binding,GO:0005515~protein binding,GO:0044822~poly(A) RNA binding,
Q12792	TWF1	0.111362	GO:0030837~negative regulation of actin filament polymerization,GO:0042989~sequestering of actin monomers,GO:0043538~regulation of actin phosphorylation,GO:0051016~barbed-end actin filament capping,GO:0098609~cell-cell adhesion,	GO:0005622~intracellular,GO:0005737~cytoplasm,GO:0005911~cell-cell junction,GO:0005913~cell-cell adherens junction,GO:0005925~focal adhesion,GO:0015629~actin cytoskeleton,GO:0030016~myofibril,GO:0030175~filopodium,GO:0032587~ruffle membrane,GO:0048471~perinuclear region of cytoplasm,	GO:0003785~actin monomer binding,GO:0004713~protein tyrosine kinase activity,GO:0005524~ATP binding,GO:0005546~phosphatidylinositol-4,5-bisphosphate binding,GO:0032403~protein complex binding,GO:0098641~cadherin binding involved in cell-cell adhesion,
A6NJA2	USP14	0.000264492	GO:0006511~ubiquitin-dependent protein catabolic process,GO:0007268~chemical synaptic transmission,GO:0010951~negative regulation of endopeptidase activity,GO:0016579~protein deubiquitination,GO:0050920~regulation of chemotaxis,GO:0061136~regulation of proteasomal protein catabolic process,GO:1903070~negative regulation of ER-associated ubiquitin-dependent protein catabolic process,	GO:0000502~proteasome complex,GO:0005737~cytoplasm,GO:0005886~plasma membrane,GO:0009986~cell surface,GO:0016023~cytoplasmic, membrane-bounded vesicle,GO:0031410~cytoplasmic vesicle,GO:0045202~synapse,GO:0070062~extracellular exosome,	GO:0004197~cysteine-type endopeptidase activity,GO:0004843~thiol-dependent ubiquitin-specific protease activity,GO:0004866~endopeptidase inhibitor activity,GO:0005515~protein binding,GO:0008193~tRNA guanylyltransferase activity,GO:0036459~thiol-dependent ubiquitinyl hydrolase activity,GO:0070628~proteasome binding,
J3QRU4	VAMP2	0.0253056	GO:0006461~protein complex assembly,GO:0006887~exocytosis,GO:0006892~post-Golgi vesicle-mediated transport,GO:0006906~vesicle fusion,GO:0007269~neurotransmitter secretion,GO:0009749~response to glucose,GO:0014047~glutamate secretion,GO:0015031~protein transport,GO:0016079~synaptic vesicle exocytosis,GO:0016192~vesicle-mediated transport,GO:0017156~calcium ion regulated exocytosis,GO:0017157~regul…	GO:0005802~trans-Golgi network,GO:0005829~cytosol,GO:0005886~plasma membrane,GO:0005887~integral component of plasma membrane,GO:0008021~synaptic vesicle,GO:0008076~voltage-gated potassium channel complex,GO:0016020~membrane,GO:0016021~integral component of membrane,GO:0030054~cell junction,GO:0030136~clathrin-coated vesicle,GO:0030141~secretory granule,GO:0030667~secretory granule membrane,GO:00…	GO:0000149~SNARE binding,GO:0005484~SNAP receptor activity,GO:0005515~protein binding,GO:0005516~calmodulin binding,GO:0005543~phospholipid binding,GO:0017075~syntaxin-1 binding,GO:0019905~syntaxin binding,GO:0043621~protein self-association,GO:0048306~calcium-dependent protein binding,	hsa04130:SNARE interactions in vesicular transport,hsa04721:Synaptic vesicle cycle,hsa04911:Insulin secretion,hsa04962:Vasopressin-regulated water reabsorption,hsa04970:Salivary secretion,
Q9P0L0	VAPA	0.245204	GO:0006888~ER to Golgi vesicle-mediated transport,GO:0007029~endoplasmic reticulum organization,GO:0007165~signal transduction,GO:0008219~cell death,GO:0030148~sphingolipid biosynthetic process,GO:0031175~neuron projection development,GO:0034975~protein folding in endoplasmic reticulum,GO:0043123~positive regulation of I-kappaB kinase/NF-kappaB signaling,GO:0044791~positive regulation by host of …	GO:0000139~Golgi membrane,GO:0005783~endoplasmic reticulum,GO:0005789~endoplasmic reticulum membrane,GO:0005886~plasma membrane,GO:0005913~cell-cell adherens junction,GO:0005923~bicellular tight junction,GO:0015630~microtubule cytoskeleton,GO:0016021~integral component of membrane,GO:0031965~nuclear membrane,GO:0031982~vesicle,GO:0048471~perinuclear region of cytoplasm,GO:0070971~endoplasmic reti…	GO:0004871~signal transducer activity,GO:0005515~protein binding,GO:0008017~microtubule binding,GO:0019904~protein domain specific binding,GO:0033149~FFAT motif binding,GO:0046982~protein heterodimerization activity,GO:0098641~cadherin binding involved in cell-cell adhesion,
P50552	VASP	0.00513661	GO:0001843~neural tube closure,GO:0007411~axon guidance,GO:0008154~actin polymerization or depolymerization,GO:0030838~positive regulation of actin filament polymerization,GO:0034329~cell junction assembly,GO:0051289~protein homotetramerization,GO:0098609~cell-cell adhesion,	GO:0005737~cytoplasm,GO:0005829~cytosol,GO:0005856~cytoskeleton,GO:0005886~plasma membrane,GO:0005913~cell-cell adherens junction,GO:0005923~bicellular tight junction,GO:0005925~focal adhesion,GO:0015629~actin cytoskeleton,GO:0030027~lamellipodium,GO:0030175~filopodium,GO:0031258~lamellipodium membrane,GO:0031527~filopodium membrane,GO:0070062~extracellular exosome,	GO:0003779~actin binding,GO:0005515~protein binding,GO:0005522~profilin binding,GO:0017124~SH3 domain binding,GO:0098641~cadherin binding involved in cell-cell adhesion,	hsa04015:Rap1 signaling pathway,hsa04022:cGMP-PKG signaling pathway,hsa04510:Focal adhesion,hsa04611:Platelet activation,hsa04666:Fc gamma R-mediated phagocytosis,hsa04670:Leukocyte transendothelial migration,
Q9Y6W5	WASF2	0.48768	GO:0001525~angiogenesis,GO:0001667~ameboidal-type cell migration,GO:0007188~adenylate cyclase-modulating G-protein coupled receptor signaling pathway,GO:0010592~positive regulation of lamellipodium assembly,GO:0016032~viral process,GO:0016601~Rac protein signal transduction,GO:0030032~lamellipodium assembly,GO:0030036~actin cytoskeleton organization,GO:0030048~actin filament-based movement,GO:003…	GO:0001726~ruffle,GO:0005622~intracellular,GO:0005769~early endosome,GO:0005829~cytosol,GO:0005856~cytoskeleton,GO:0005913~cell-cell adherens junction,GO:0015629~actin cytoskeleton,GO:0030027~lamellipodium,GO:0031209~SCAR complex,GO:0070062~extracellular exosome,	GO:0003779~actin binding,GO:0005515~protein binding,GO:0017124~SH3 domain binding,GO:0032403~protein complex binding,GO:0098641~cadherin binding involved in cell-cell adhesion,	hsa04520:Adherens junction,hsa04666:Fc gamma R-mediated phagocytosis,hsa04810:Regulation of actin cytoskeleton,hsa05100:Bacterial invasion of epithelial cells,hsa05131:Shigellosis,hsa05132:Salmonella infection,hsa05231:Choline metabolism in cancer,
H0Y704	ZNF185	0.0186565		GO:0005737~cytoplasm,GO:0005886~plasma membrane,GO:0005925~focal adhesion,GO:0015629~actin cytoskeleton,	GO:0008270~zinc ion binding,
Q9NUJ1	ABHD10	0.122714	GO:0019391~glucuronoside catabolic process,GO:0052695~cellular glucuronidation,	GO:0005739~mitochondrion,GO:0005759~mitochondrial matrix,GO:0005829~cytosol,	GO:0004553~hydrolase activity, hydrolyzing O-glycosyl compounds,GO:0102390~mycophenolic acid acyl-glucuronide esterase activity,
J3QSX6	ABLIM1	0.0568841	GO:0007010~cytoskeleton organization,GO:0007601~visual perception,GO:0009887~organ morphogenesis,GO:0030032~lamellipodium assembly,GO:0042384~cilium assembly,	GO:0001725~stress fiber,GO:0005737~cytoplasm,GO:0015629~actin cytoskeleton,GO:0030027~lamellipodium,	GO:0003779~actin binding,GO:0005515~protein binding,GO:0008270~zinc ion binding,	hsa04360:Axon guidance,
O00763	ACACB	0.336684	GO:0006084~acetyl-CoA metabolic process,GO:0006633~fatty acid biosynthetic process,GO:0006768~biotin metabolic process,GO:0006853~carnitine shuttle,GO:0010629~negative regulation of gene expression,GO:0010884~positive regulation of lipid storage,GO:0010906~regulation of glucose metabolic process,GO:0014070~response to organic cyclic compound,GO:0031325~positive regulation of cellular metabolic pr…	GO:0005634~nucleus,GO:0005739~mitochondrion,GO:0005741~mitochondrial outer membrane,GO:0005829~cytosol,GO:0012505~endomembrane system,	GO:0003989~acetyl-CoA carboxylase activity,GO:0004075~biotin carboxylase activity,GO:0005515~protein binding,GO:0005524~ATP binding,GO:0009374~biotin binding,GO:0046872~metal ion binding,	hsa00061:Fatty acid biosynthesis,hsa00620:Pyruvate metabolism,hsa00640:Propanoate metabolism,hsa01100:Metabolic pathways,hsa04152:AMPK signaling pathway,hsa04910:Insulin signaling pathway,hsa04920:Adipocytokine signaling pathway,hsa04922:Glucagon signaling pathway,hsa04931:Insulin resistance,
P24752	ACAT1	0.00343499	GO:0001889~liver development,GO:0006085~acetyl-CoA biosynthetic process,GO:0006550~isoleucine catabolic process,GO:0006635~fatty acid beta-oxidation,GO:0007420~brain development,GO:0008152~metabolic process,GO:0009083~branched-chain amino acid catabolic process,GO:0009725~response to hormone,GO:0014070~response to organic cyclic compound,GO:0015936~coenzyme A metabolic process,GO:0015937~coenzyme…	GO:0005739~mitochondrion,GO:0005743~mitochondrial inner membrane,GO:0005759~mitochondrial matrix,GO:0070062~extracellular exosome,	GO:0003985~acetyl-CoA C-acetyltransferase activity,GO:0016747~transferase activity, transferring acyl groups other than amino-acyl groups,GO:0016830~carbon-carbon lyase activity,GO:0016885~ligase activity, forming carbon-carbon bonds,GO:0019899~enzyme binding,GO:0042803~protein homodimerization activity,GO:0046872~metal ion binding,GO:0050662~coenzyme binding,	hsa00071:Fatty acid degradation,hsa00072:Synthesis and degradation of ketone bodies,hsa00280:Valine, leucine and isoleucine degradation,hsa00310:Lysine degradation,hsa00380:Tryptophan metabolism,hsa00620:Pyruvate metabolism,hsa00630:Glyoxylate and dicarboxylate metabolism,hsa00640:Propanoate metabolism,hsa00650:Butanoate metabolism,hsa00900:Terpenoid backbone biosynthesis,hsa01100:Metabolic pathw…
P21399	ACO1	0.219806	GO:0006099~tricarboxylic acid cycle,GO:0006101~citrate metabolic process,GO:0006417~regulation of translation,GO:0006879~cellular iron ion homeostasis,GO:0008152~metabolic process,GO:0009791~post-embryonic development,GO:0010040~response to iron(II) ion,GO:0050892~intestinal absorption,	GO:0005623~cell,GO:0005737~cytoplasm,GO:0005739~mitochondrion,GO:0005783~endoplasmic reticulum,GO:0005794~Golgi apparatus,GO:0005829~cytosol,GO:0070062~extracellular exosome,	GO:0003723~RNA binding,GO:0003994~aconitate hydratase activity,GO:0005515~protein binding,GO:0030350~iron-responsive element binding,GO:0046872~metal ion binding,GO:0051539~4 iron, 4 sulfur cluster binding,	hsa00020:Citrate cycle (TCA cycle),hsa00630:Glyoxylate and dicarboxylate metabolism,hsa01100:Metabolic pathways,hsa01130:Biosynthesis of antibiotics,hsa01200:Carbon metabolism,hsa01210:2-Oxocarboxylic acid metabolism,hsa01230:Biosynthesis of amino acids,
V9GYX7	ACTR10	0.0100987	GO:0007018~microtubule-based movement,	GO:0005737~cytoplasm,GO:0005869~dynactin complex,	GO:0005515~protein binding,
R4GMT0	ACTR1A	0.000241709	GO:0000086~G2/M transition of mitotic cell cycle,GO:0016192~vesicle-mediated transport,GO:0019886~antigen processing and presentation of exogenous peptide antigen via MHC class II,	GO:0005737~cytoplasm,GO:0005813~centrosome,GO:0005829~cytosol,GO:0005869~dynactin complex,GO:0005875~microtubule associated complex,GO:0015630~microtubule cytoskeleton,GO:0043209~myelin sheath,GO:0070062~extracellular exosome,GO:1990752~microtubule end,	GO:0005524~ATP binding,
P00325	ADH1B	9.12021e-05	GO:0006069~ethanol oxidation,	GO:0005829~cytosol,	GO:0004024~alcohol dehydrogenase activity, zinc-dependent,GO:0008270~zinc ion binding,GO:0016491~oxidoreductase activity,	hsa00010:Glycolysis / Gluconeogenesis,hsa00071:Fatty acid degradation,hsa00350:Tyrosine metabolism,hsa00830:Retinol metabolism,hsa00980:Metabolism of xenobiotics by cytochrome P450,hsa00982:Drug metabolism - cytochrome P450,hsa01100:Metabolic pathways,hsa05204:Chemical carcinogenesis,
F6QUH3	AFAP1L2	0.00151424	GO:0006954~inflammatory response,GO:0007346~regulation of mitotic cell cycle,GO:0032675~regulation of interleukin-6 production,GO:0032757~positive regulation of interleukin-8 production,GO:0045742~positive regulation of epidermal growth factor receptor signaling pathway,GO:0045893~positive regulation of transcription, DNA-templated,GO:0061098~positive regulation of protein tyrosine kinase activit…	GO:0005737~cytoplasm,GO:0005886~plasma membrane,	GO:0017124~SH3 domain binding,GO:0030296~protein tyrosine kinase activator activity,GO:0035591~signaling adaptor activity,GO:0042169~SH2 domain binding,
P23526	AHCY	7.14446e-05	GO:0000096~sulfur amino acid metabolic process,GO:0001666~response to hypoxia,GO:0002439~chronic inflammatory response to antigenic stimulus,GO:0006730~one-carbon metabolic process,GO:0007584~response to nutrient,GO:0019510~S-adenosylhomocysteine catabolic process,GO:0032259~methylation,GO:0033353~S-adenosylmethionine cycle,GO:0042745~circadian sleep/wake cycle,GO:0071268~homocysteine biosyntheti…	GO:0005634~nucleus,GO:0005737~cytoplasm,GO:0005829~cytosol,GO:0042470~melanosome,GO:0043005~neuron projection,GO:0070062~extracellular exosome,	GO:0004013~adenosylhomocysteinase activity,GO:0005515~protein binding,GO:0030554~adenyl nucleotide binding,GO:0042802~identical protein binding,GO:0051287~NAD binding,	hsa00270:Cysteine and methionine metabolism,hsa01100:Metabolic pathways,
O95433	AHSA1	0.00455292	GO:0006950~response to stress,GO:0032781~positive regulation of ATPase activity,GO:0098609~cell-cell adhesion,	GO:0005737~cytoplasm,GO:0005783~endoplasmic reticulum,GO:0005829~cytosol,GO:0005913~cell-cell adherens junction,GO:0070062~extracellular exosome,	GO:0001671~ATPase activator activity,GO:0005515~protein binding,GO:0051087~chaperone binding,GO:0098641~cadherin binding involved in cell-cell adhesion,
Q96BJ3	AIDA	0.702709	GO:0009953~dorsal/ventral pattern formation,GO:0043496~regulation of protein homodimerization activity,GO:0043508~negative regulation of JUN kinase activity,GO:0046329~negative regulation of JNK cascade,GO:0048264~determination of ventral identity,	GO:0005737~cytoplasm,GO:0016020~membrane,	GO:0005515~protein binding,GO:0019904~protein domain specific binding,GO:0035091~phosphatidylinositol binding,
F8W1A4	AK2	0.000215794	GO:0006139~nucleobase-containing compound metabolic process,GO:0006172~ADP biosynthetic process,GO:0015949~nucleobase-containing small molecule interconversion,GO:0046033~AMP metabolic process,GO:0046034~ATP metabolic process,GO:0046939~nucleotide phosphorylation,	GO:0005743~mitochondrial inner membrane,GO:0005758~mitochondrial intermembrane space,GO:0070062~extracellular exosome,GO:0097226~sperm mitochondrial sheath,	GO:0004017~adenylate kinase activity,GO:0005524~ATP binding,GO:0019205~nucleobase-containing compound kinase activity,	hsa00230:Purine metabolism,hsa01100:Metabolic pathways,hsa01130:Biosynthesis of antibiotics,
Q02952	AKAP12	0.00126817	GO:0006605~protein targeting,GO:0007186~G-protein coupled receptor signaling pathway,GO:0010739~positive regulation of protein kinase A signaling,GO:0030819~positive regulation of cAMP biosynthetic process,GO:0090036~regulation of protein kinase C signaling,	GO:0005737~cytoplasm,GO:0005856~cytoskeleton,GO:0005886~plasma membrane,GO:0005925~focal adhesion,GO:0005938~cell cortex,	GO:0005515~protein binding,GO:0008179~adenylate cyclase binding,GO:0051018~protein kinase A binding,
A0A087WX84	AKAP9	0.0229577	GO:0000086~G2/M transition of mitotic cell cycle,GO:0000165~MAPK cascade,GO:0006810~transport,GO:0007020~microtubule nucleation,GO:0007165~signal transduction,GO:0007194~negative regulation of adenylate cyclase activity,GO:0007268~chemical synaptic transmission,GO:0033138~positive regulation of peptidyl-serine phosphorylation,GO:0043547~positive regulation of GTPase activity,GO:0051602~response t…	GO:0005794~Golgi apparatus,GO:0005795~Golgi stack,GO:0005801~cis-Golgi network,GO:0005813~centrosome,GO:0005829~cytosol,GO:0005856~cytoskeleton,GO:0008076~voltage-gated potassium channel complex,GO:0043025~neuronal cell body,GO:0043231~intracellular membrane-bounded organelle,GO:0044307~dendritic branch,GO:0097060~synaptic membrane,	GO:0003677~DNA binding,GO:0005088~Ras guanyl-nucleotide exchange factor activity,GO:0005102~receptor binding,GO:0005515~protein binding,GO:0015459~potassium channel regulator activity,GO:0016301~kinase activity,GO:0032947~protein complex scaffold,GO:0034237~protein kinase A regulatory subunit binding,GO:0044325~ion channel binding,
B4DK69	AKR1C2	0.00185256	GO:0006693~prostaglandin metabolic process,GO:0007186~G-protein coupled receptor signaling pathway,GO:0007586~digestion,GO:0008202~steroid metabolic process,GO:0008284~positive regulation of cell proliferation,GO:0030855~epithelial cell differentiation,GO:0042448~progesterone metabolic process,GO:0044597~daunorubicin metabolic process,GO:0044598~doxorubicin metabolic process,GO:0051897~positive r…	GO:0005737~cytoplasm,	GO:0004032~alditol:NADP+ 1-oxidoreductase activity,GO:0016491~oxidoreductase activity,GO:0016655~oxidoreductase activity, acting on NAD(P)H, quinone or similar compound as acceptor,GO:0018636~phenanthrene 9,10-monooxygenase activity,GO:0031406~carboxylic acid binding,GO:0032052~bile acid binding,GO:0047026~androsterone dehydrogenase (A-specific) activity,GO:0047086~ketosteroid monooxygenase activ…	hsa00140:Steroid hormone biosynthesis,hsa00980:Metabolism of xenobiotics by cytochrome P450,
H3BLU7	AKR7A2	0.152788	GO:0005975~carbohydrate metabolic process,GO:0006081~cellular aldehyde metabolic process,GO:0006805~xenobiotic metabolic process,GO:0044597~daunorubicin metabolic process,GO:0044598~doxorubicin metabolic process,GO:0055114~oxidation-reduction process,	GO:0005739~mitochondrion,GO:0005794~Golgi apparatus,GO:0005829~cytosol,GO:0070062~extracellular exosome,	GO:0000252~C-3 sterol dehydrogenase (C-4 sterol decarboxylase) activity,GO:0004032~alditol:NADP+ 1-oxidoreductase activity,GO:0004033~aldo-keto reductase (NADP) activity,GO:0004448~isocitrate dehydrogenase activity,GO:0004495~mevaldate reductase activity,GO:0005515~protein binding,GO:0008875~gluconate dehydrogenase activity,GO:0009055~electron carrier activity,GO:0018451~epoxide dehydrogenase act…	hsa00980:Metabolism of xenobiotics by cytochrome P450,
P54886	ALDH18A1	0.000223779	GO:0006536~glutamate metabolic process,GO:0006561~proline biosynthetic process,GO:0006592~ornithine biosynthetic process,GO:0008652~cellular amino acid biosynthetic process,GO:0016310~phosphorylation,GO:0019240~citrulline biosynthetic process,GO:0055114~oxidation-reduction process,GO:0055129~L-proline biosynthetic process,	GO:0005737~cytoplasm,GO:0005739~mitochondrion,GO:0005743~mitochondrial inner membrane,	GO:0004349~glutamate 5-kinase activity,GO:0004350~glutamate-5-semialdehyde dehydrogenase activity,GO:0005515~protein binding,GO:0005524~ATP binding,GO:0017084~delta1-pyrroline-5-carboxylate synthetase activity,GO:0042802~identical protein binding,GO:0044822~poly(A) RNA binding,	hsa00330:Arginine and proline metabolism,hsa01100:Metabolic pathways,hsa01230:Biosynthesis of amino acids,
P00352	ALDH1A1	1.64324e-05	GO:0001523~retinoid metabolic process,GO:0006069~ethanol oxidation,GO:0006081~cellular aldehyde metabolic process,GO:0042572~retinol metabolic process,GO:0043547~positive regulation of GTPase activity,GO:0055114~oxidation-reduction process,GO:0061624~fructose catabolic process to hydroxyacetone phosphate and glyceraldehyde-3-phosphate,	GO:0005737~cytoplasm,GO:0005829~cytosol,GO:0070062~extracellular exosome,	GO:0001758~retinal dehydrogenase activity,GO:0004029~aldehyde dehydrogenase (NAD) activity,GO:0005096~GTPase activator activity,GO:0005497~androgen binding,GO:0016491~oxidoreductase activity,GO:0016620~oxidoreductase activity, acting on the aldehyde or oxo group of donors, NAD or NADP as acceptor,GO:0018479~benzaldehyde dehydrogenase (NAD+) activity,	hsa00830:Retinol metabolism,hsa01100:Metabolic pathways,
H0YMG7	ALDH1A2	0.26087	GO:0001568~blood vessel development,GO:0001822~kidney development,GO:0001889~liver development,GO:0001936~regulation of endothelial cell proliferation,GO:0002138~retinoic acid biosynthetic process,GO:0003007~heart morphogenesis,GO:0006776~vitamin A metabolic process,GO:0007494~midgut development,GO:0008284~positive regulation of cell proliferation,GO:0008285~negative regulation of cell proliferat…	GO:0005737~cytoplasm,GO:0005829~cytosol,GO:0048471~perinuclear region of cytoplasm,	GO:0001758~retinal dehydrogenase activity,GO:0004028~3-chloroallyl aldehyde dehydrogenase activity,GO:0004029~aldehyde dehydrogenase (NAD) activity,GO:0016491~oxidoreductase activity,GO:0016620~oxidoreductase activity, acting on the aldehyde or oxo group of donors, NAD or NADP as acceptor,GO:0016918~retinal binding,	hsa00830:Retinol metabolism,hsa01100:Metabolic pathways,
P49189	ALDH9A1	0.123259	GO:0006081~cellular aldehyde metabolic process,GO:0042136~neurotransmitter biosynthetic process,GO:0042445~hormone metabolic process,GO:0045329~carnitine biosynthetic process,GO:0055114~oxidation-reduction process,	GO:0005737~cytoplasm,GO:0005829~cytosol,GO:0070062~extracellular exosome,	GO:0004028~3-chloroallyl aldehyde dehydrogenase activity,GO:0004029~aldehyde dehydrogenase (NAD) activity,GO:0016620~oxidoreductase activity, acting on the aldehyde or oxo group of donors, NAD or NADP as acceptor,GO:0019145~aminobutyraldehyde dehydrogenase activity,GO:0033737~1-pyrroline dehydrogenase activity,GO:0047105~4-trimethylammoniobutyraldehyde dehydrogenase activity,	hsa00010:Glycolysis / Gluconeogenesis,hsa00053:Ascorbate and aldarate metabolism,hsa00071:Fatty acid degradation,hsa00280:Valine, leucine and isoleucine degradation,hsa00310:Lysine degradation,hsa00330:Arginine and proline metabolism,hsa00340:Histidine metabolism,hsa00380:Tryptophan metabolism,hsa00410:beta-Alanine metabolism,hsa00561:Glycerolipid metabolism,hsa00620:Pyruvate metabolism,hsa01100:…
P09972	ALDOC	0.177213	GO:0006000~fructose metabolic process,GO:0006094~gluconeogenesis,GO:0006096~glycolytic process,GO:0030388~fructose 1,6-bisphosphate metabolic process,GO:0030855~epithelial cell differentiation,GO:0061621~canonical glycolysis,	GO:0005739~mitochondrion,GO:0005829~cytosol,GO:0005856~cytoskeleton,GO:0070062~extracellular exosome,	GO:0004332~fructose-bisphosphate aldolase activity,GO:0005515~protein binding,GO:0008092~cytoskeletal protein binding,	hsa00010:Glycolysis / Gluconeogenesis,hsa00030:Pentose phosphate pathway,hsa00051:Fructose and mannose metabolism,hsa01100:Metabolic pathways,hsa01130:Biosynthesis of antibiotics,hsa01200:Carbon metabolism,hsa01230:Biosynthesis of amino acids,
Q9Y6Q5	AP1M2	0.0792339	GO:0006605~protein targeting,GO:0006886~intracellular protein transport,GO:0006903~vesicle targeting,GO:0016192~vesicle-mediated transport,GO:0019886~antigen processing and presentation of exogenous peptide antigen via MHC class II,GO:0050690~regulation of defense response to virus by virus,	GO:0000139~Golgi membrane,GO:0005765~lysosomal membrane,GO:0005829~cytosol,GO:0030131~clathrin adaptor complex,GO:0030659~cytoplasmic vesicle membrane,GO:0030669~clathrin-coated endocytic vesicle membrane,GO:0032588~trans-Golgi network membrane,GO:0043231~intracellular membrane-bounded organelle,	GO:0005515~protein binding,	hsa04142:Lysosome,
S4R3D6	APIP	0.0737363	GO:0006915~apoptotic process,GO:0019284~L-methionine biosynthetic process from S-adenosylmethionine,GO:0019509~L-methionine biosynthetic process from methylthioadenosine,GO:0043066~negative regulation of apoptotic process,GO:0051289~protein homotetramerization,GO:0070269~pyroptosis,GO:0070372~regulation of ERK1 and ERK2 cascade,	GO:0005737~cytoplasm,	GO:0005515~protein binding,GO:0008270~zinc ion binding,GO:0042802~identical protein binding,GO:0046570~methylthioribulose 1-phosphate dehydratase activity,GO:0046872~metal ion binding,	hsa00270:Cysteine and methionine metabolism,hsa01100:Metabolic pathways,
P53367	ARFIP1	0.0382989	GO:0006886~intracellular protein transport,GO:0034315~regulation of Arp2/3 complex-mediated actin nucleation,GO:0050708~regulation of protein secretion,GO:0098609~cell-cell adhesion,	GO:0000139~Golgi membrane,GO:0005829~cytosol,GO:0005913~cell-cell adherens junction,GO:0032588~trans-Golgi network membrane,	GO:0019904~protein domain specific binding,GO:0070273~phosphatidylinositol-4-phosphate binding,GO:0098641~cadherin binding involved in cell-cell adhesion,
H7C4P1	ARHGAP25	0.0108382	GO:0007165~signal transduction,GO:0043547~positive regulation of GTPase activity,GO:0051056~regulation of small GTPase mediated signal transduction,	GO:0005829~cytosol,	GO:0005096~GTPase activator activity,
P52566	ARHGDIB	0.0459949	GO:0006928~movement of cell or subcellular component,GO:0007162~negative regulation of cell adhesion,GO:0007275~multicellular organism development,GO:0035023~regulation of Rho protein signal transduction,GO:0043547~positive regulation of GTPase activity,GO:0051056~regulation of small GTPase mediated signal transduction,GO:0071461~cellular response to redox state,GO:1901164~negative regulation of …	GO:0005737~cytoplasm,GO:0005829~cytosol,GO:0005856~cytoskeleton,GO:0016020~membrane,GO:0016023~cytoplasmic, membrane-bounded vesicle,GO:0031410~cytoplasmic vesicle,GO:0070062~extracellular exosome,	GO:0003924~GTPase activity,GO:0005094~Rho GDP-dissociation inhibitor activity,GO:0005096~GTPase activator activity,GO:0005515~protein binding,GO:0048365~Rac GTPase binding,	hsa04722:Neurotrophin signaling pathway,hsa04962:Vasopressin-regulated water reabsorption,
Q9UH62	ARMCX3	0.000196102	GO:0034613~cellular protein localization,GO:0045944~positive regulation of transcription from RNA polymerase II promoter,	GO:0016021~integral component of membrane,GO:0031307~integral component of mitochondrial outer membrane,
O15143	ARPC1B	0.000221167	GO:0006928~movement of cell or subcellular component,GO:0034314~Arp2/3 complex-mediated actin nucleation,GO:0038096~Fc-gamma receptor signaling pathway involved in phagocytosis,GO:0043627~response to estrogen,GO:0048013~ephrin receptor signaling pathway,	GO:0005829~cytosol,GO:0005885~Arp2/3 protein complex,GO:0005925~focal adhesion,GO:0015629~actin cytoskeleton,GO:0036284~tubulobulbar complex,GO:0070062~extracellular exosome,	GO:0005200~structural constituent of cytoskeleton,GO:0051015~actin filament binding,	hsa04144:Endocytosis,hsa04666:Fc gamma R-mediated phagocytosis,hsa04810:Regulation of actin cytoskeleton,hsa05100:Bacterial invasion of epithelial cells,hsa05130:Pathogenic Escherichia coli infection,hsa05131:Shigellosis,hsa05132:Salmonella infection,
P59998	ARPC4	0.0240321	GO:0030041~actin filament polymerization,GO:0034314~Arp2/3 complex-mediated actin nucleation,GO:0038096~Fc-gamma receptor signaling pathway involved in phagocytosis,GO:0045010~actin nucleation,GO:0048013~ephrin receptor signaling pathway,	GO:0005829~cytosol,GO:0005885~Arp2/3 protein complex,GO:0042995~cell projection,GO:0070062~extracellular exosome,	GO:0005200~structural constituent of cytoskeleton,GO:0005515~protein binding,GO:0019899~enzyme binding,GO:0030674~protein binding, bridging,GO:0051015~actin filament binding,	hsa04144:Endocytosis,hsa04666:Fc gamma R-mediated phagocytosis,hsa04810:Regulation of actin cytoskeleton,hsa05100:Bacterial invasion of epithelial cells,hsa05130:Pathogenic Escherichia coli infection,hsa05131:Shigellosis,hsa05132:Salmonella infection,
O15511	ARPC5	0.820653	GO:0006928~movement of cell or subcellular component,GO:0014909~smooth muscle cell migration,GO:0016477~cell migration,GO:0021769~orbitofrontal cortex development,GO:0030011~maintenance of cell polarity,GO:0030036~actin cytoskeleton organization,GO:0031023~microtubule organizing center organization,GO:0034314~Arp2/3 complex-mediated actin nucleation,GO:0038096~Fc-gamma receptor signaling pathway …	GO:0005737~cytoplasm,GO:0005829~cytosol,GO:0005885~Arp2/3 protein complex,GO:0005925~focal adhesion,GO:0015629~actin cytoskeleton,GO:0043005~neuron projection,GO:0070062~extracellular exosome,	GO:0005200~structural constituent of cytoskeleton,GO:0005515~protein binding,GO:0051015~actin filament binding,	hsa04144:Endocytosis,hsa04666:Fc gamma R-mediated phagocytosis,hsa04810:Regulation of actin cytoskeleton,hsa05100:Bacterial invasion of epithelial cells,hsa05130:Pathogenic Escherichia coli infection,hsa05131:Shigellosis,hsa05132:Salmonella infection,
Q9BPX5	ARPC5L	0.00144012	GO:0016477~cell migration,GO:0034314~Arp2/3 complex-mediated actin nucleation,	GO:0005737~cytoplasm,GO:0005885~Arp2/3 protein complex,GO:0005925~focal adhesion,GO:0070062~extracellular exosome,	GO:0051015~actin filament binding,	hsa04144:Endocytosis,hsa04666:Fc gamma R-mediated phagocytosis,hsa04810:Regulation of actin cytoskeleton,hsa05100:Bacterial invasion of epithelial cells,hsa05130:Pathogenic Escherichia coli infection,hsa05131:Shigellosis,hsa05132:Salmonella infection,
P04424	ASL	0.015685	GO:0000050~urea cycle,GO:0006475~internal protein amino acid acetylation,GO:0006526~arginine biosynthetic process,GO:0006527~arginine catabolic process,GO:0042450~arginine biosynthetic process via ornithine,GO:0051262~protein tetramerization,	GO:0005737~cytoplasm,GO:0005829~cytosol,GO:0070062~extracellular exosome,	GO:0004056~argininosuccinate lyase activity,GO:0005515~protein binding,GO:0042802~identical protein binding,	hsa00220:Arginine biosynthesis,hsa00250:Alanine, aspartate and glutamate metabolism,hsa01100:Metabolic pathways,hsa01130:Biosynthesis of antibiotics,hsa01230:Biosynthesis of amino acids,
P08243	ASNS	0.000338858	GO:0001889~liver development,GO:0006529~asparagine biosynthetic process,GO:0006541~glutamine metabolic process,GO:0008652~cellular amino acid biosynthetic process,GO:0009416~response to light stimulus,GO:0009612~response to mechanical stimulus,GO:0009636~response to toxic substance,GO:0031427~response to methotrexate,GO:0032354~response to follicle-stimulating hormone,GO:0032870~cellular response…	GO:0005829~cytosol,	GO:0004066~asparagine synthase (glutamine-hydrolyzing) activity,GO:0005515~protein binding,GO:0005524~ATP binding,GO:0042803~protein homodimerization activity,GO:0048037~cofactor binding,	hsa00250:Alanine, aspartate and glutamate metabolism,hsa01100:Metabolic pathways,
O95352	ATG7	6.51905e-05	GO:0006464~cellular protein modification process,GO:0006497~protein lipidation,GO:0006501~C-terminal protein lipidation,GO:0006914~autophagy,GO:0006995~cellular response to nitrogen starvation,GO:0009267~cellular response to starvation,GO:0010508~positive regulation of autophagy,GO:0015031~protein transport,GO:0016236~macroautophagy,GO:0016239~positive regulation of macroautophagy,GO:0016567~prot…	GO:0000407~pre-autophagosomal structure,GO:0005737~cytoplasm,GO:0005829~cytosol,GO:0005930~axoneme,	GO:0004839~ubiquitin activating enzyme activity,GO:0005515~protein binding,GO:0008134~transcription factor binding,GO:0008641~small protein activating enzyme activity,GO:0019778~Atg12 activating enzyme activity,GO:0019779~Atg8 activating enzyme activity,GO:0042803~protein homodimerization activity,	hsa04140:Regulation of autophagy,
O00244	ATOX1	0.00567518	GO:0006825~copper ion transport,GO:0006878~cellular copper ion homeostasis,GO:0006979~response to oxidative stress,GO:0015680~intracellular copper ion transport,GO:0030001~metal ion transport,GO:0035434~copper ion transmembrane transport,	GO:0005829~cytosol,	GO:0005375~copper ion transmembrane transporter activity,GO:0005507~copper ion binding,GO:0005515~protein binding,GO:0016530~metallochaperone activity,GO:0016531~copper chaperone activity,GO:0032767~copper-dependent protein binding,GO:0046872~metal ion binding,	hsa04978:Mineral absorption,
H7C1E7	BCAS1	0.287168		GO:0005737~cytoplasm,GO:0070062~extracellular exosome,
P54687	BCAT1	2.19311e-06	GO:0000082~G1/S transition of mitotic cell cycle,GO:0006532~aspartate biosynthetic process,GO:0008152~metabolic process,GO:0008283~cell proliferation,GO:0008652~cellular amino acid biosynthetic process,GO:0009082~branched-chain amino acid biosynthetic process,GO:0009083~branched-chain amino acid catabolic process,GO:0009098~leucine biosynthetic process,GO:0009099~valine biosynthetic process,	GO:0005739~mitochondrion,GO:0005829~cytosol,	GO:0003824~catalytic activity,GO:0004084~branched-chain-amino-acid transaminase activity,GO:0030170~pyridoxal phosphate binding,GO:0042802~identical protein binding,GO:0052654~L-leucine transaminase activity,GO:0052655~L-valine transaminase activity,GO:0052656~L-isoleucine transaminase activity,	hsa00280:Valine, leucine and isoleucine degradation,hsa00290:Valine, leucine and isoleucine biosynthesis,hsa00770:Pantothenate and CoA biosynthesis,hsa01100:Metabolic pathways,hsa01130:Biosynthesis of antibiotics,hsa01210:2-Oxocarboxylic acid metabolism,hsa01230:Biosynthesis of amino acids,
Q9BUT1	BDH2	0.305013	GO:0006635~fatty acid beta-oxidation,GO:0019290~siderophore biosynthetic process,GO:0030855~epithelial cell differentiation,GO:0042168~heme metabolic process,GO:0046951~ketone body biosynthetic process,GO:0055072~iron ion homeostasis,	GO:0005737~cytoplasm,GO:0005739~mitochondrion,GO:0005829~cytosol,GO:0070062~extracellular exosome,	GO:0003858~3-hydroxybutyrate dehydrogenase activity,GO:0008667~2,3-dihydro-2,3-dihydroxybenzoate dehydrogenase activity,GO:0016491~oxidoreductase activity,GO:0016628~oxidoreductase activity, acting on the CH-CH group of donors, NAD or NADP as acceptor,GO:0051287~NAD binding,	hsa00072:Synthesis and degradation of ketone bodies,hsa00650:Butanoate metabolism,hsa01100:Metabolic pathways,
P53004	BLVRA	2.04183e-05	GO:0042167~heme catabolic process,GO:0055114~oxidation-reduction process,	GO:0005737~cytoplasm,GO:0005829~cytosol,GO:0070062~extracellular exosome,	GO:0004074~biliverdin reductase activity,GO:0005515~protein binding,GO:0008270~zinc ion binding,GO:0016491~oxidoreductase activity,	hsa00860:Porphyrin and chlorophyll metabolism,
O95861	BPNT1	0.127857	GO:0006139~nucleobase-containing compound metabolic process,GO:0007399~nervous system development,GO:0016311~dephosphorylation,GO:0046854~phosphatidylinositol phosphorylation,GO:0050427~3'-phosphoadenosine 5'-phosphosulfate metabolic process,	GO:0005737~cytoplasm,GO:0005829~cytosol,GO:0070062~extracellular exosome,	GO:0000287~magnesium ion binding,GO:0008441~3'(2'),5'-bisphosphate nucleotidase activity,	hsa00920:Sulfur metabolism,hsa01100:Metabolic pathways,hsa01130:Biosynthesis of antibiotics,
P00915	CA1	0.000274055	GO:0006730~one-carbon metabolic process,GO:0015701~bicarbonate transport,	GO:0005737~cytoplasm,GO:0005829~cytosol,GO:0070062~extracellular exosome,	GO:0004064~arylesterase activity,GO:0004089~carbonate dehydratase activity,GO:0005515~protein binding,GO:0008270~zinc ion binding,GO:0016836~hydro-lyase activity,	hsa00910:Nitrogen metabolism,
E5RG43	CA1	0.955111
P07451	CA3	0.0121625	GO:0006730~one-carbon metabolic process,GO:0006979~response to oxidative stress,GO:0015701~bicarbonate transport,GO:0016311~dephosphorylation,GO:0045471~response to ethanol,	GO:0005737~cytoplasm,GO:0005829~cytosol,	GO:0004089~carbonate dehydratase activity,GO:0008270~zinc ion binding,GO:0016151~nickel cation binding,GO:0016791~phosphatase activity,	hsa00910:Nitrogen metabolism,
Q9Y376	CAB39	1.68691e-05	GO:0007050~cell cycle arrest,GO:0010800~positive regulation of peptidyl-threonine phosphorylation,GO:0018105~peptidyl-serine phosphorylation,GO:0023014~signal transduction by protein phosphorylation,GO:0032147~activation of protein kinase activity,GO:0035556~intracellular signal transduction,GO:0051291~protein heterooligomerization,GO:0071476~cellular hypotonic response,GO:0071902~positive regula…	GO:0005829~cytosol,GO:0043234~protein complex,GO:0070062~extracellular exosome,GO:1902554~serine/threonine protein kinase complex,	GO:0004674~protein serine/threonine kinase activity,GO:0005515~protein binding,GO:0019900~kinase binding,GO:0030295~protein kinase activator activity,GO:0043539~protein serine/threonine kinase activator activity,	hsa04150:mTOR signaling pathway,hsa04152:AMPK signaling pathway,
Q9Y6Q1	CAPN6	0.0105514	GO:0001578~microtubule bundle formation,GO:0006508~proteolysis,GO:0051493~regulation of cytoskeleton organization,	GO:0005876~spindle microtubule,GO:0048471~perinuclear region of cytoplasm,	GO:0004198~calcium-dependent cysteine-type endopeptidase activity,GO:0008017~microtubule binding,
Q9Y2V2	CARHSP1	0.000289216	GO:0006355~regulation of transcription, DNA-templated,GO:0035556~intracellular signal transduction,GO:0043488~regulation of mRNA stability,	GO:0000177~cytoplasmic exosome (RNase complex),GO:0000932~cytoplasmic mRNA processing body,GO:0005829~cytosol,GO:0043186~P granule,GO:0070062~extracellular exosome,	GO:0003677~DNA binding,GO:0003730~mRNA 3'-UTR binding,GO:0005515~protein binding,GO:0019902~phosphatase binding,
Q9HA77	CARS2	0.485936	GO:0006418~tRNA aminoacylation for protein translation,GO:0006423~cysteinyl-tRNA aminoacylation,	GO:0005737~cytoplasm,GO:0005759~mitochondrial matrix,	GO:0004812~aminoacyl-tRNA ligase activity,GO:0004817~cysteine-tRNA ligase activity,GO:0005524~ATP binding,GO:0046872~metal ion binding,	hsa00970:Aminoacyl-tRNA biosynthesis,
P16152	CBR1	0.000582201	GO:0017144~drug metabolic process,GO:0019371~cyclooxygenase pathway,GO:0030855~epithelial cell differentiation,GO:0042373~vitamin K metabolic process,GO:0055114~oxidation-reduction process,	GO:0005829~cytosol,GO:0070062~extracellular exosome,GO:1903561~extracellular vesicle,	GO:0004090~carbonyl reductase (NADPH) activity,GO:0016655~oxidoreductase activity, acting on NAD(P)H, quinone or similar compound as acceptor,GO:0047021~15-hydroxyprostaglandin dehydrogenase (NADP+) activity,GO:0050221~prostaglandin-E2 9-reductase activity,	hsa00590:Arachidonic acid metabolism,hsa00980:Metabolism of xenobiotics by cytochrome P450,hsa01100:Metabolic pathways,hsa05204:Chemical carcinogenesis,
Q8IVM0	CCDC50	0.00233383	GO:0007605~sensory perception of sound,	GO:0005737~cytoplasm,GO:0005874~microtubule,	GO:0005515~protein binding,GO:0031625~ubiquitin protein ligase binding,
Q16204	CCDC6	0.567051	GO:0007010~cytoskeleton organization,	GO:0005737~cytoplasm,GO:0005856~cytoskeleton,	GO:0005200~structural constituent of cytoskeleton,GO:0005515~protein binding,GO:0017124~SH3 domain binding,	hsa05200:Pathways in cancer,hsa05216:Thyroid cancer,
P78371	CCT2	0.00162458	GO:0006457~protein folding,GO:0007339~binding of sperm to zona pellucida,GO:0032212~positive regulation of telomere maintenance via telomerase,GO:0050821~protein stabilization,GO:0051086~chaperone mediated protein folding independent of cofactor,GO:0051131~chaperone-mediated protein complex assembly,GO:0051973~positive regulation of telomerase activity,GO:0090666~scaRNA localization to Cajal body…	GO:0002199~zona pellucida receptor complex,GO:0005737~cytoplasm,GO:0005829~cytosol,GO:0005832~chaperonin-containing T-complex,GO:0005874~microtubule,GO:0031012~extracellular matrix,GO:0043209~myelin sheath,GO:0044297~cell body,GO:0070062~extracellular exosome,	GO:0005515~protein binding,GO:0005524~ATP binding,GO:0031625~ubiquitin protein ligase binding,GO:0044183~protein binding involved in protein folding,GO:0051082~unfolded protein binding,
P40227	CCT6A	1.17668e-06	GO:0006457~protein folding,GO:0032212~positive regulation of telomere maintenance via telomerase,GO:0050821~protein stabilization,GO:1904851~positive regulation of establishment of protein localization to telomere,GO:1904871~positive regulation of protein localization to Cajal body,GO:1904874~positive regulation of telomerase RNA localization to Cajal body,	GO:0005737~cytoplasm,GO:0005829~cytosol,GO:0005832~chaperonin-containing T-complex,GO:0005874~microtubule,GO:0031012~extracellular matrix,GO:0070062~extracellular exosome,	GO:0005515~protein binding,GO:0005524~ATP binding,GO:0044183~protein binding involved in protein folding,GO:0044822~poly(A) RNA binding,GO:0051082~unfolded protein binding,GO:0071987~WD40-repeat domain binding,
Q99832	CCT7	7.02118e-06	GO:0006457~protein folding,GO:0007339~binding of sperm to zona pellucida,GO:0032212~positive regulation of telomere maintenance via telomerase,GO:0050821~protein stabilization,GO:1901998~toxin transport,GO:1904851~positive regulation of establishment of protein localization to telomere,GO:1904871~positive regulation of protein localization to Cajal body,GO:1904874~positive regulation of telomeras…	GO:0002199~zona pellucida receptor complex,GO:0005737~cytoplasm,GO:0005739~mitochondrion,GO:0005829~cytosol,GO:0005832~chaperonin-containing T-complex,GO:0005874~microtubule,GO:0044297~cell body,GO:0070062~extracellular exosome,	GO:0005515~protein binding,GO:0005524~ATP binding,GO:0042802~identical protein binding,GO:0051082~unfolded protein binding,
P50990	CCT8	1.1451e-06	GO:0006457~protein folding,GO:0007339~binding of sperm to zona pellucida,GO:0032212~positive regulation of telomere maintenance via telomerase,GO:0046931~pore complex assembly,GO:0050821~protein stabilization,GO:0098609~cell-cell adhesion,GO:1901998~toxin transport,GO:1904851~positive regulation of establishment of protein localization to telomere,GO:1904871~positive regulation of protein localiz…	GO:0002199~zona pellucida receptor complex,GO:0005654~nucleoplasm,GO:0005737~cytoplasm,GO:0005813~centrosome,GO:0005829~cytosol,GO:0005832~chaperonin-containing T-complex,GO:0005874~microtubule,GO:0005913~cell-cell adherens junction,GO:0005929~cilium,GO:0044297~cell body,GO:0045111~intermediate filament cytoskeleton,GO:0070062~extracellular exosome,	GO:0005515~protein binding,GO:0005524~ATP binding,GO:0042623~ATPase activity, coupled,GO:0051082~unfolded protein binding,GO:0098641~cadherin binding involved in cell-cell adhesion,
Q16543	CDC37	4.25178e-05	GO:0000079~regulation of cyclin-dependent protein serine/threonine kinase activity,GO:0006457~protein folding,GO:0006605~protein targeting,GO:0010608~posttranscriptional regulation of gene expression,GO:0018108~peptidyl-tyrosine phosphorylation,GO:0038128~ERBB2 signaling pathway,GO:0050821~protein stabilization,GO:0051301~cell division,GO:0060334~regulation of interferon-gamma-mediated signaling …	GO:0005737~cytoplasm,GO:0005829~cytosol,GO:0070062~extracellular exosome,GO:1990565~HSP90-CDC37 chaperone complex,	GO:0004713~protein tyrosine kinase activity,GO:0005515~protein binding,GO:0019887~protein kinase regulator activity,GO:0019900~kinase binding,GO:0019901~protein kinase binding,GO:0031072~heat shock protein binding,GO:0051082~unfolded protein binding,GO:0051087~chaperone binding,GO:0051879~Hsp90 protein binding,	hsa04151:PI3K-Akt signaling pathway,
P41208	CETN2	0.0672836	GO:0000086~G2/M transition of mitotic cell cycle,GO:0000715~nucleotide-excision repair, DNA damage recognition,GO:0000717~nucleotide-excision repair, DNA duplex unwinding,GO:0006289~nucleotide-excision repair,GO:0006294~nucleotide-excision repair, preincision complex assembly,GO:0007067~mitotic nuclear division,GO:0007099~centriole replication,GO:0007283~spermatogenesis,GO:0016925~protein sumoyla…	GO:0005622~intracellular,GO:0005654~nucleoplasm,GO:0005813~centrosome,GO:0005814~centriole,GO:0005829~cytosol,GO:0032391~photoreceptor connecting cilium,GO:0036064~ciliary basal body,GO:0071942~XPC complex,	GO:0005509~calcium ion binding,GO:0005515~protein binding,GO:0008017~microtubule binding,GO:0031683~G-protein beta/gamma-subunit complex binding,GO:0032795~heterotrimeric G-protein binding,	hsa03420:Nucleotide excision repair,
J3QTB2	CHCHD6	0.171683	GO:0006974~cellular response to DNA damage stimulus,GO:0042407~cristae formation,	GO:0005739~mitochondrion,GO:0005743~mitochondrial inner membrane,GO:0061617~MICOS complex,	GO:0005515~protein binding,
Q8NE62	CHDH	0.949477	GO:0019285~glycine betaine biosynthetic process from choline,GO:0042426~choline catabolic process,GO:0055114~oxidation-reduction process,	GO:0005743~mitochondrial inner membrane,	GO:0005515~protein binding,GO:0008812~choline dehydrogenase activity,GO:0016614~oxidoreductase activity, acting on CH-OH group of donors,GO:0050660~flavin adenine dinucleotide binding,	hsa00260:Glycine, serine and threonine metabolism,hsa01100:Metabolic pathways,
Q9Y3E7	CHMP3	0.0459661	GO:0000920~cell separation after cytokinesis,GO:0006914~autophagy,GO:0006915~apoptotic process,GO:0006997~nucleus organization,GO:0007049~cell cycle,GO:0007080~mitotic metaphase plate congression,GO:0010824~regulation of centrosome duplication,GO:0015031~protein transport,GO:0016197~endosomal transport,GO:0019058~viral life cycle,GO:0036258~multivesicular body assembly,GO:0039702~viral budding vi…	GO:0000815~ESCRT III complex,GO:0005622~intracellular,GO:0005770~late endosome,GO:0005829~cytosol,GO:0005886~plasma membrane,GO:0016023~cytoplasmic, membrane-bounded vesicle,GO:0031410~cytoplasmic vesicle,GO:0031902~late endosome membrane,GO:0070062~extracellular exosome,	GO:0005515~protein binding,GO:0031210~phosphatidylcholine binding,GO:0042803~protein homodimerization activity,GO:1990381~ubiquitin-specific protease binding,	hsa04144:Endocytosis,
F5H0N7	CLIP1	0.0205987	GO:0001578~microtubule bundle formation,GO:0007062~sister chromatid cohesion,GO:0007067~mitotic nuclear division,GO:0031116~positive regulation of microtubule polymerization,GO:0044861~protein transport into plasma membrane raft,GO:1900006~positive regulation of dendrite development,	GO:0000776~kinetochore,GO:0001726~ruffle,GO:0005635~nuclear envelope,GO:0005737~cytoplasm,GO:0005768~endosome,GO:0005813~centrosome,GO:0005829~cytosol,GO:0005874~microtubule,GO:0005881~cytoplasmic microtubule,GO:0005882~intermediate filament,GO:0015630~microtubule cytoskeleton,GO:0030659~cytoplasmic vesicle membrane,GO:0035371~microtubule plus-end,GO:0044354~macropinosome,GO:1990752~microtubule e…	GO:0003676~nucleic acid binding,GO:0005515~protein binding,GO:0008017~microtubule binding,GO:0008270~zinc ion binding,GO:0015631~tubulin binding,GO:0042803~protein homodimerization activity,GO:0046872~metal ion binding,GO:0051010~microtubule plus-end binding,
O76031	CLPX	0.858823	GO:0006457~protein folding,GO:0010952~positive regulation of peptidase activity,GO:0051603~proteolysis involved in cellular protein catabolic process,	GO:0005654~nucleoplasm,GO:0005737~cytoplasm,GO:0005739~mitochondrion,GO:0005743~mitochondrial inner membrane,GO:0005759~mitochondrial matrix,GO:0009368~endopeptidase Clp complex,GO:0009841~mitochondrial endopeptidase Clp complex,GO:0042645~mitochondrial nucleoid,	GO:0004176~ATP-dependent peptidase activity,GO:0005515~protein binding,GO:0005524~ATP binding,GO:0016504~peptidase activator activity,GO:0016887~ATPase activity,GO:0046872~metal ion binding,GO:0051082~unfolded protein binding,
K7EIG1	CLUH	0.00632928	GO:0007005~mitochondrion organization,GO:0048312~intracellular distribution of mitochondria,	GO:0005737~cytoplasm,	GO:0003729~mRNA binding,
Q96DG6	CMBL	0.000829286	GO:0006805~xenobiotic metabolic process,	GO:0005829~cytosol,GO:0070062~extracellular exosome,	GO:0016787~hydrolase activity,	hsa01100:Metabolic pathways,hsa01130:Biosynthesis of antibiotics,
Q96KP4	CNDP2	0.000450949	GO:0000096~sulfur amino acid metabolic process,GO:0006508~proteolysis,GO:0006750~glutathione biosynthetic process,GO:0008152~metabolic process,GO:0043171~peptide catabolic process,	GO:0005654~nucleoplasm,GO:0005737~cytoplasm,GO:0005829~cytosol,GO:0070062~extracellular exosome,	GO:0004180~carboxypeptidase activity,GO:0008237~metallopeptidase activity,GO:0008270~zinc ion binding,GO:0016787~hydrolase activity,GO:0016805~dipeptidase activity,GO:0070573~metallodipeptidase activity,GO:0102008~cytosolic dipeptidase activity,	hsa00330:Arginine and proline metabolism,hsa00340:Histidine metabolism,hsa00410:beta-Alanine metabolism,hsa01100:Metabolic pathways,
P51911	CNN1	9.68466e-06	GO:0006940~regulation of smooth muscle contraction,GO:0031032~actomyosin structure organization,GO:1904706~negative regulation of vascular smooth muscle cell proliferation,	GO:0005856~cytoskeleton,GO:0005925~focal adhesion,	GO:0003779~actin binding,GO:0005515~protein binding,GO:0005516~calmodulin binding,
Q9UNS2	COPS3	0.000240387	GO:0000715~nucleotide-excision repair, DNA damage recognition,GO:0001701~in utero embryonic development,GO:0006283~transcription-coupled nucleotide-excision repair,GO:0006511~ubiquitin-dependent protein catabolic process,GO:0007165~signal transduction,GO:0009416~response to light stimulus,GO:0010388~cullin deneddylation,	GO:0005634~nucleus,GO:0005654~nucleoplasm,GO:0005737~cytoplasm,GO:0008180~COP9 signalosome,	GO:0005515~protein binding,
F5H7C6	COPS7A	0.273684	GO:0000715~nucleotide-excision repair, DNA damage recognition,GO:0006283~transcription-coupled nucleotide-excision repair,GO:0010388~cullin deneddylation,	GO:0005654~nucleoplasm,GO:0005737~cytoplasm,GO:0008180~COP9 signalosome,	GO:0005515~protein binding,
P20674	COX5A	0.00678893	GO:0006123~mitochondrial electron transport, cytochrome c to oxygen,GO:1902600~hydrogen ion transmembrane transport,	GO:0005743~mitochondrial inner membrane,GO:0005751~mitochondrial respiratory chain complex IV,GO:0043209~myelin sheath,GO:0070062~extracellular exosome,	GO:0004129~cytochrome-c oxidase activity,GO:0005515~protein binding,GO:0009055~electron carrier activity,GO:0046872~metal ion binding,	hsa00190:Oxidative phosphorylation,hsa01100:Metabolic pathways,hsa04260:Cardiac muscle contraction,hsa04932:Non-alcoholic fatty liver disease (NAFLD),hsa05010:Alzheimer's disease,hsa05012:Parkinson's disease,hsa05016:Huntington's disease,
P10606	COX5B	0.000281045	GO:0006123~mitochondrial electron transport, cytochrome c to oxygen,GO:0007585~respiratory gaseous exchange,GO:0042776~mitochondrial ATP synthesis coupled proton transport,	GO:0005739~mitochondrion,GO:0005740~mitochondrial envelope,GO:0005743~mitochondrial inner membrane,GO:0005751~mitochondrial respiratory chain complex IV,GO:0070062~extracellular exosome,	GO:0004129~cytochrome-c oxidase activity,GO:0005515~protein binding,GO:0046872~metal ion binding,	hsa00190:Oxidative phosphorylation,hsa01100:Metabolic pathways,hsa04260:Cardiac muscle contraction,hsa04932:Non-alcoholic fatty liver disease (NAFLD),hsa05010:Alzheimer's disease,hsa05012:Parkinson's disease,hsa05016:Huntington's disease,
P14854	COX6B1	0.000662108	GO:0006123~mitochondrial electron transport, cytochrome c to oxygen,GO:0021762~substantia nigra development,GO:1902600~hydrogen ion transmembrane transport,	GO:0005739~mitochondrion,GO:0005743~mitochondrial inner membrane,GO:0005758~mitochondrial intermembrane space,	GO:0004129~cytochrome-c oxidase activity,	hsa00190:Oxidative phosphorylation,hsa01100:Metabolic pathways,hsa04260:Cardiac muscle contraction,hsa04932:Non-alcoholic fatty liver disease (NAFLD),hsa05010:Alzheimer's disease,hsa05012:Parkinson's disease,hsa05016:Huntington's disease,
P14406	COX7A2	0.000291759	GO:1902600~hydrogen ion transmembrane transport,	GO:0005746~mitochondrial respiratory chain,GO:0016021~integral component of membrane,GO:0070062~extracellular exosome,	GO:0004129~cytochrome-c oxidase activity,	hsa00190:Oxidative phosphorylation,hsa04260:Cardiac muscle contraction,hsa04932:Non-alcoholic fatty liver disease (NAFLD),hsa05010:Alzheimer's disease,hsa05012:Parkinson's disease,hsa05016:Huntington's disease,
O75131	CPNE3	0.139224	GO:0006468~protein phosphorylation,GO:0006629~lipid metabolic process,GO:0016192~vesicle-mediated transport,GO:0030335~positive regulation of cell migration,GO:0038128~ERBB2 signaling pathway,GO:0046474~glycerophospholipid biosynthetic process,GO:0071277~cellular response to calcium ion,GO:0071363~cellular response to growth factor stimulus,	GO:0005634~nucleus,GO:0005737~cytoplasm,GO:0005829~cytosol,GO:0005886~plasma membrane,GO:0005925~focal adhesion,GO:0030054~cell junction,GO:0070062~extracellular exosome,	GO:0004674~protein serine/threonine kinase activity,GO:0005215~transporter activity,GO:0005515~protein binding,GO:0005544~calcium-dependent phospholipid binding,GO:0030971~receptor tyrosine kinase binding,GO:0044822~poly(A) RNA binding,GO:0048306~calcium-dependent protein binding,
P36551	CPOX	0.107783	GO:0006779~porphyrin-containing compound biosynthetic process,GO:0006782~protoporphyrinogen IX biosynthetic process,GO:0006783~heme biosynthetic process,GO:0010039~response to iron ion,GO:0010288~response to lead ion,GO:0017085~response to insecticide,GO:0046685~response to arsenic-containing substance,GO:0051597~response to methylmercury,GO:0055114~oxidation-reduction process,	GO:0005737~cytoplasm,GO:0005739~mitochondrion,GO:0005743~mitochondrial inner membrane,GO:0005758~mitochondrial intermembrane space,GO:0016021~integral component of membrane,	GO:0004109~coproporphyrinogen oxidase activity,GO:0005212~structural constituent of eye lens,GO:0042803~protein homodimerization activity,	hsa00860:Porphyrin and chlorophyll metabolism,hsa01100:Metabolic pathways,
Q9BRF8	CPPED1	0.00867544	GO:0006470~protein dephosphorylation,	GO:0005737~cytoplasm,GO:0005886~plasma membrane,GO:0070062~extracellular exosome,	GO:0004721~phosphoprotein phosphatase activity,GO:0046872~metal ion binding,
P43155	CRAT	0.00687912	GO:0006810~transport,GO:0019254~carnitine metabolic process, CoA-linked,GO:0033540~fatty acid beta-oxidation using acyl-CoA oxidase,	GO:0005739~mitochondrion,GO:0005743~mitochondrial inner membrane,GO:0005777~peroxisome,GO:0005782~peroxisomal matrix,GO:0005783~endoplasmic reticulum,	GO:0004092~carnitine O-acetyltransferase activity,GO:0005102~receptor binding,GO:0016746~transferase activity, transferring acyl groups,	hsa04146:Peroxisome,
P46109	CRKL	0.000453972	GO:0000186~activation of MAPKK activity,GO:0001568~blood vessel development,GO:0007254~JNK cascade,GO:0007265~Ras protein signal transduction,GO:0007507~heart development,GO:0008284~positive regulation of cell proliferation,GO:0009887~organ morphogenesis,GO:0009952~anterior/posterior pattern specification,GO:0035556~intracellular signal transduction,GO:0048538~thymus development,GO:0060017~parath…	GO:0005768~endosome,GO:0005829~cytosol,GO:0005913~cell-cell adherens junction,GO:0070062~extracellular exosome,	GO:0004871~signal transducer activity,GO:0005070~SH3/SH2 adaptor activity,GO:0005515~protein binding,GO:0044822~poly(A) RNA binding,GO:0098641~cadherin binding involved in cell-cell adhesion,	hsa04010:MAPK signaling pathway,hsa04012:ErbB signaling pathway,hsa04015:Rap1 signaling pathway,hsa04062:Chemokine signaling pathway,hsa04510:Focal adhesion,hsa04666:Fc gamma R-mediated phagocytosis,hsa04722:Neurotrophin signaling pathway,hsa04810:Regulation of actin cytoskeleton,hsa04910:Insulin signaling pathway,hsa05100:Bacterial invasion of epithelial cells,hsa05131:Shigellosis,hsa05200:Pathw…
E9PD68	CRMP1	0.000219895	GO:0000226~microtubule cytoskeleton organization,GO:0006139~nucleobase-containing compound metabolic process,GO:0007399~nervous system development,GO:0007411~axon guidance,GO:0010977~negative regulation of neuron projection development,GO:1904530~negative regulation of actin filament binding,	GO:0005737~cytoplasm,GO:0005815~microtubule organizing center,GO:0005819~spindle,GO:0005829~cytosol,	GO:0005515~protein binding,GO:0016810~hydrolase activity, acting on carbon-nitrogen (but not peptide) bonds,GO:0031005~filamin binding,
Q9Y2S2	CRYL1	0.962669	GO:0006631~fatty acid metabolic process,GO:0019640~glucuronate catabolic process to xylulose 5-phosphate,GO:0055114~oxidation-reduction process,	GO:0005634~nucleus,GO:0005730~nucleolus,GO:0005737~cytoplasm,GO:0005794~Golgi apparatus,GO:0005829~cytosol,GO:0005886~plasma membrane,GO:0070062~extracellular exosome,	GO:0003857~3-hydroxyacyl-CoA dehydrogenase activity,GO:0042803~protein homodimerization activity,GO:0050104~L-gulonate 3-dehydrogenase activity,GO:0070403~NAD+ binding,	hsa00040:Pentose and glucuronate interconversions,hsa01100:Metabolic pathways,
Q08257	CRYZ	0.0168452	GO:0007601~visual perception,GO:0042178~xenobiotic catabolic process,GO:0051289~protein homotetramerization,GO:0055114~oxidation-reduction process,	GO:0005737~cytoplasm,GO:0005829~cytosol,GO:0070062~extracellular exosome,	GO:0003730~mRNA 3'-UTR binding,GO:0003960~NADPH:quinone reductase activity,GO:0008270~zinc ion binding,GO:0016491~oxidoreductase activity,GO:0070402~NADPH binding,GO:0070404~NADH binding,
Q9NRF8	CTPS2	0.00715603	GO:0006220~pyrimidine nucleotide metabolic process,GO:0006221~pyrimidine nucleotide biosynthetic process,GO:0006541~glutamine metabolic process,GO:0015949~nucleobase-containing small molecule interconversion,GO:0044210~'de novo' CTP biosynthetic process,	GO:0005739~mitochondrion,GO:0005829~cytosol,	GO:0003883~CTP synthase activity,GO:0005515~protein binding,GO:0005524~ATP binding,	hsa00240:Pyrimidine metabolism,hsa01100:Metabolic pathways,
Q14247	CTTN	1.52213e-05	GO:0006886~intracellular protein transport,GO:0006898~receptor-mediated endocytosis,GO:0006930~substrate-dependent cell migration, cell extension,GO:0030041~actin filament polymerization,GO:0030516~regulation of axon extension,GO:0030838~positive regulation of actin filament polymerization,GO:0031532~actin cytoskeleton reorganization,GO:0045987~positive regulation of smooth muscle contraction,GO:…	GO:0001726~ruffle,GO:0002102~podosome,GO:0005737~cytoplasm,GO:0005794~Golgi apparatus,GO:0005856~cytoskeleton,GO:0005884~actin filament,GO:0005886~plasma membrane,GO:0005905~clathrin-coated pit,GO:0005913~cell-cell adherens junction,GO:0005925~focal adhesion,GO:0005938~cell cortex,GO:0008076~voltage-gated potassium channel complex,GO:0030027~lamellipodium,GO:0030426~growth cone,GO:0030863~cortica…	GO:0005515~protein binding,GO:0005522~profilin binding,GO:0098641~cadherin binding involved in cell-cell adhesion,	hsa04530:Tight junction,hsa05100:Bacterial invasion of epithelial cells,hsa05130:Pathogenic Escherichia coli infection,hsa05131:Shigellosis,hsa05205:Proteoglycans in cancer,
B1AMN7	CTTNBP2NL	0.0373843	GO:0006470~protein dephosphorylation,GO:0032410~negative regulation of transporter activity,GO:0034763~negative regulation of transmembrane transport,	GO:0005737~cytoplasm,GO:0015629~actin cytoskeleton,	GO:0005515~protein binding,GO:0051721~protein phosphatase 2A binding,
P07108	DBI	8.40029e-05	GO:0006810~transport,GO:0018345~protein palmitoylation,GO:0036151~phosphatidylcholine acyl-chain remodeling,	GO:0005783~endoplasmic reticulum,GO:0005794~Golgi apparatus,GO:0070062~extracellular exosome,GO:0097038~perinuclear endoplasmic reticulum,	GO:0000062~fatty-acyl-CoA binding,GO:0008289~lipid binding,GO:0030156~benzodiazepine receptor binding,GO:0036042~long-chain fatty acyl-CoA binding,GO:0046983~protein dimerization activity,	hsa03320:PPAR signaling pathway,
P32321	DCTD	0.000824113	GO:0006220~pyrimidine nucleotide metabolic process,GO:0006226~dUMP biosynthetic process,GO:0006231~dTMP biosynthetic process,GO:0009165~nucleotide biosynthetic process,GO:0046134~pyrimidine nucleoside biosynthetic process,	GO:0005737~cytoplasm,GO:0005829~cytosol,GO:0070062~extracellular exosome,	GO:0003824~catalytic activity,GO:0004132~dCMP deaminase activity,GO:0005515~protein binding,GO:0008270~zinc ion binding,GO:0042802~identical protein binding,	hsa00240:Pyrimidine metabolism,hsa01100:Metabolic pathways,
X6RCK5	DCTN3	0.0378082	GO:0000086~G2/M transition of mitotic cell cycle,GO:0000910~cytokinesis,GO:0006888~ER to Golgi vesicle-mediated transport,GO:0007017~microtubule-based process,GO:0007067~mitotic nuclear division,GO:0019886~antigen processing and presentation of exogenous peptide antigen via MHC class II,	GO:0000777~condensed chromosome kinetochore,GO:0005813~centrosome,GO:0005819~spindle,GO:0005829~cytosol,GO:0005869~dynactin complex,GO:0030496~midbody,GO:0032154~cleavage furrow,GO:0048471~perinuclear region of cytoplasm,	GO:0005198~structural molecule activity,GO:0005515~protein binding,
E5RIK5	DCTN6	0.0227361	GO:0006888~ER to Golgi vesicle-mediated transport,GO:0019886~antigen processing and presentation of exogenous peptide antigen via MHC class II,	GO:0000777~condensed chromosome kinetochore,GO:0005813~centrosome,GO:0005829~cytosol,GO:0005869~dynactin complex,		hsa04962:Vasopressin-regulated water reabsorption,
O94760	DDAH1	0.00145672	GO:0000052~citrulline metabolic process,GO:0003073~regulation of systemic arterial blood pressure,GO:0006527~arginine catabolic process,GO:0007263~nitric oxide mediated signal transduction,GO:0045429~positive regulation of nitric oxide biosynthetic process,GO:0045766~positive regulation of angiogenesis,GO:0050999~regulation of nitric-oxide synthase activity,	GO:0005739~mitochondrion,GO:0005829~cytosol,GO:0070062~extracellular exosome,	GO:0003824~catalytic activity,GO:0016403~dimethylargininase activity,GO:0016597~amino acid binding,GO:0046872~metal ion binding,
P30046	DDT	0.00051974	GO:0042438~melanin biosynthetic process,	GO:0005737~cytoplasm,GO:0070062~extracellular exosome,	GO:0004167~dopachrome isomerase activity,GO:0033981~D-dopachrome decarboxylase activity,
Q8IY21	DDX60	0.0526568	GO:0009615~response to virus,GO:0045087~innate immune response,GO:0051607~defense response to virus,GO:1900245~positive regulation of MDA-5 signaling pathway,GO:1900246~positive regulation of RIG-I signaling pathway,	GO:0005737~cytoplasm,GO:0045111~intermediate filament cytoskeleton,	GO:0003690~double-stranded DNA binding,GO:0003725~double-stranded RNA binding,GO:0003727~single-stranded RNA binding,GO:0004386~helicase activity,GO:0005515~protein binding,GO:0005524~ATP binding,
G3V158	DERA	0.0286899	GO:0006098~pentose-phosphate shunt,GO:0009264~deoxyribonucleotide catabolic process,GO:0016052~carbohydrate catabolic process,GO:0046121~deoxyribonucleoside catabolic process,GO:0046386~deoxyribose phosphate catabolic process,	GO:0005634~nucleus,GO:0005737~cytoplasm,GO:0005829~cytosol,GO:0070062~extracellular exosome,	GO:0004139~deoxyribose-phosphate aldolase activity,	hsa00030:Pentose phosphate pathway,
H9KV28	DIAPH1	0.132524	GO:0007010~cytoskeleton organization,GO:0007605~sensory perception of sound,GO:0008360~regulation of cell shape,GO:0030036~actin cytoskeleton organization,GO:0030041~actin filament polymerization,GO:0030335~positive regulation of cell migration,GO:0032886~regulation of microtubule-based process,GO:0035372~protein localization to microtubule,GO:0051279~regulation of release of sequestered calcium …	GO:0005815~microtubule organizing center,GO:0005829~cytosol,GO:0032587~ruffle membrane,GO:0072686~mitotic spindle,	GO:0003779~actin binding,GO:0005102~receptor binding,GO:0005515~protein binding,GO:0017048~Rho GTPase binding,GO:0044325~ion channel binding,GO:0044822~poly(A) RNA binding,	hsa04510:Focal adhesion,hsa04810:Regulation of actin cytoskeleton,hsa05131:Shigellosis,
E9PGY2	DNAAF5	0.0156081	GO:0003341~cilium movement,GO:0036158~outer dynein arm assembly,GO:0036159~inner dynein arm assembly,	GO:0005737~cytoplasm,GO:0031514~motile cilium,	GO:0045505~dynein intermediate chain binding,
B1AK20	DNAJC11	0.00177474		GO:0005739~mitochondrion,GO:0005743~mitochondrial inner membrane,GO:0070062~extracellular exosome,	GO:0005515~protein binding,
F6RFD5	DSTN	0.118428	GO:0008154~actin polymerization or depolymerization,GO:0030042~actin filament depolymerization,GO:0030043~actin filament fragmentation,GO:0030836~positive regulation of actin filament depolymerization,GO:0051014~actin filament severing,	GO:0015629~actin cytoskeleton,GO:0030864~cortical actin cytoskeleton,GO:0070062~extracellular exosome,	GO:0005515~protein binding,GO:0051015~actin filament binding,
Q13409	DYNC1I2	0.25795	GO:0000086~G2/M transition of mitotic cell cycle,GO:0006888~ER to Golgi vesicle-mediated transport,GO:0007018~microtubule-based movement,GO:0016032~viral process,GO:0019886~antigen processing and presentation of exogenous peptide antigen via MHC class II,	GO:0005737~cytoplasm,GO:0005813~centrosome,GO:0005829~cytosol,GO:0005868~cytoplasmic dynein complex,GO:0005874~microtubule,GO:0031982~vesicle,	GO:0003777~microtubule motor activity,GO:0005515~protein binding,	hsa04145:Phagosome,hsa04962:Vasopressin-regulated water reabsorption,hsa05132:Salmonella infection,
P63172	DYNLT1	0.00176669	GO:0000132~establishment of mitotic spindle orientation,GO:0007067~mitotic nuclear division,GO:0008277~regulation of G-protein coupled receptor protein signaling pathway,GO:0019060~intracellular transport of viral protein in host cell,GO:0043087~regulation of GTPase activity,GO:0046718~viral entry into host cell,GO:0048812~neuron projection morphogenesis,GO:0050768~negative regulation of neurogen…	GO:0005794~Golgi apparatus,GO:0005819~spindle,GO:0005868~cytoplasmic dynein complex,GO:0005881~cytoplasmic microtubule,GO:0043657~host cell,GO:0099503~secretory vesicle,	GO:0003774~motor activity,GO:0005515~protein binding,GO:0042802~identical protein binding,
Q9NTX5	ECHDC1	0.0532952	GO:0008152~metabolic process,	GO:0005829~cytosol,GO:0016021~integral component of membrane,GO:0070062~extracellular exosome,	GO:0003824~catalytic activity,GO:0004492~methylmalonyl-CoA decarboxylase activity,GO:0016831~carboxy-lyase activity,	hsa00640:Propanoate metabolism,
P24534	EEF1B2	0.0325779	GO:0006414~translational elongation,GO:0045471~response to ethanol,	GO:0005634~nucleus,GO:0005737~cytoplasm,GO:0005783~endoplasmic reticulum,GO:0005829~cytosol,GO:0005853~eukaryotic translation elongation factor 1 complex,	GO:0003746~translation elongation factor activity,GO:0005515~protein binding,
Q9BUP0	EFHD1	0.382221	GO:0031175~neuron projection development,	GO:0005743~mitochondrial inner membrane,GO:0070062~extracellular exosome,	GO:0005509~calcium ion binding,
P41567	EIF1	0.283635	GO:0006413~translational initiation,GO:0006446~regulation of translational initiation,GO:0006950~response to stress,GO:0009048~dosage compensation by inactivation of X chromosome,	GO:0005634~nucleus,GO:0005737~cytoplasm,	GO:0003743~translation initiation factor activity,GO:0008135~translation factor activity, RNA binding,GO:0044822~poly(A) RNA binding,	hsa03013:RNA transport,
P47813	EIF1AX	0.00144324	GO:0006413~translational initiation,	GO:0005829~cytosol,	GO:0003743~translation initiation factor activity,GO:0005515~protein binding,GO:0008135~translation factor activity, RNA binding,GO:0044822~poly(A) RNA binding,	hsa03013:RNA transport,
H0YK01	EIF2B2	0.138464	GO:0001541~ovarian follicle development,GO:0006413~translational initiation,GO:0006446~regulation of translational initiation,GO:0007417~central nervous system development,GO:0009408~response to heat,GO:0009749~response to glucose,GO:0014003~oligodendrocyte development,GO:0019509~L-methionine biosynthetic process from methylthioadenosine,GO:0042552~myelination,GO:0043434~response to peptide hormo…	GO:0005737~cytoplasm,GO:0005829~cytosol,GO:0005851~eukaryotic translation initiation factor 2B complex,	GO:0003743~translation initiation factor activity,GO:0005085~guanyl-nucleotide exchange factor activity,GO:0005515~protein binding,GO:0005524~ATP binding,GO:0005525~GTP binding,GO:0046523~S-methyl-5-thioribose-1-phosphate isomerase activity,	hsa03013:RNA transport,
P20042	EIF2S2	0.000409385	GO:0001701~in utero embryonic development,GO:0002176~male germ cell proliferation,GO:0006413~translational initiation,GO:0008584~male gonad development,GO:0055085~transmembrane transport,	GO:0005634~nucleus,GO:0005737~cytoplasm,GO:0005829~cytosol,GO:0005850~eukaryotic translation initiation factor 2 complex,	GO:0003723~RNA binding,GO:0003743~translation initiation factor activity,GO:0005515~protein binding,GO:0008135~translation factor activity, RNA binding,GO:0044822~poly(A) RNA binding,GO:0046872~metal ion binding,	hsa03013:RNA transport,
P41091	EIF2S3	0.000195618	GO:0001731~formation of translation preinitiation complex,GO:0006413~translational initiation,GO:0055085~transmembrane transport,GO:0098609~cell-cell adhesion,	GO:0005634~nucleus,GO:0005737~cytoplasm,GO:0005829~cytosol,GO:0005913~cell-cell adherens junction,GO:0070062~extracellular exosome,	GO:0003743~translation initiation factor activity,GO:0003924~GTPase activity,GO:0005515~protein binding,GO:0005525~GTP binding,GO:0008135~translation factor activity, RNA binding,GO:0098641~cadherin binding involved in cell-cell adhesion,	hsa03013:RNA transport,
P55884	EIF3B	0.0016914	GO:0001731~formation of translation preinitiation complex,GO:0006413~translational initiation,GO:0006446~regulation of translational initiation,GO:0075522~IRES-dependent viral translational initiation,GO:0075525~viral translational termination-reinitiation,	GO:0005654~nucleoplasm,GO:0005737~cytoplasm,GO:0005829~cytosol,GO:0005852~eukaryotic translation initiation factor 3 complex,GO:0016282~eukaryotic 43S preinitiation complex,GO:0033290~eukaryotic 48S preinitiation complex,GO:0070062~extracellular exosome,GO:0071541~eukaryotic translation initiation factor 3 complex, eIF3m,	GO:0000166~nucleotide binding,GO:0003723~RNA binding,GO:0003743~translation initiation factor activity,GO:0005515~protein binding,GO:0031369~translation initiation factor binding,GO:0032947~protein complex scaffold,	hsa03013:RNA transport,
Q99613	EIF3C	0.00208623	GO:0001731~formation of translation preinitiation complex,GO:0006413~translational initiation,GO:0006446~regulation of translational initiation,	GO:0005829~cytosol,GO:0005852~eukaryotic translation initiation factor 3 complex,GO:0016282~eukaryotic 43S preinitiation complex,GO:0033290~eukaryotic 48S preinitiation complex,	GO:0003743~translation initiation factor activity,GO:0005515~protein binding,GO:0031369~translation initiation factor binding,GO:0044822~poly(A) RNA binding,	hsa03013:RNA transport,
Q13347	EIF3I	0.00946771	GO:0001731~formation of translation preinitiation complex,GO:0006413~translational initiation,GO:0006446~regulation of translational initiation,	GO:0005829~cytosol,GO:0005852~eukaryotic translation initiation factor 3 complex,GO:0016282~eukaryotic 43S preinitiation complex,GO:0033290~eukaryotic 48S preinitiation complex,GO:0070062~extracellular exosome,GO:0071541~eukaryotic translation initiation factor 3 complex, eIF3m,	GO:0003743~translation initiation factor activity,GO:0005515~protein binding,	hsa03013:RNA transport,
O75822	EIF3J	0.515975	GO:0001731~formation of translation preinitiation complex,GO:0002181~cytoplasmic translation,GO:0006413~translational initiation,GO:0006446~regulation of translational initiation,	GO:0005829~cytosol,GO:0005852~eukaryotic translation initiation factor 3 complex,GO:0016282~eukaryotic 43S preinitiation complex,GO:0033290~eukaryotic 48S preinitiation complex,	GO:0003743~translation initiation factor activity,GO:0005515~protein binding,	hsa03013:RNA transport,
Q14240	EIF4A2	0.00507711	GO:0000289~nuclear-transcribed mRNA poly(A) tail shortening,GO:0006413~translational initiation,GO:0006446~regulation of translational initiation,GO:0010501~RNA secondary structure unwinding,GO:0016032~viral process,GO:1900260~negative regulation of RNA-directed RNA polymerase activity,	GO:0005829~cytosol,GO:0016281~eukaryotic translation initiation factor 4F complex,GO:0048471~perinuclear region of cytoplasm,	GO:0003676~nucleic acid binding,GO:0003743~translation initiation factor activity,GO:0004004~ATP-dependent RNA helicase activity,GO:0004386~helicase activity,GO:0005515~protein binding,GO:0005524~ATP binding,GO:0016887~ATPase activity,GO:0044822~poly(A) RNA binding,	hsa03013:RNA transport,
F8W0K0	EIF4B	0.0238771	GO:0000289~nuclear-transcribed mRNA poly(A) tail shortening,GO:0001731~formation of translation preinitiation complex,GO:0002181~cytoplasmic translation,GO:0006413~translational initiation,GO:0006446~regulation of translational initiation,GO:0097010~eukaryotic translation initiation factor 4F complex assembly,	GO:0005829~cytosol,GO:0005844~polysome,GO:0016281~eukaryotic translation initiation factor 4F complex,GO:0030425~dendrite,GO:0043025~neuronal cell body,	GO:0000166~nucleotide binding,GO:0003723~RNA binding,GO:0003743~translation initiation factor activity,GO:0004386~helicase activity,GO:0005515~protein binding,GO:0033592~RNA strand annealing activity,GO:0034057~RNA strand-exchange activity,GO:0043024~ribosomal small subunit binding,GO:0044822~poly(A) RNA binding,	hsa03013:RNA transport,hsa04150:mTOR signaling pathway,hsa04151:PI3K-Akt signaling pathway,hsa05205:Proteoglycans in cancer,
P06730	EIF4E	0.698766	GO:0000082~G1/S transition of mitotic cell cycle,GO:0000289~nuclear-transcribed mRNA poly(A) tail shortening,GO:0001662~behavioral fear response,GO:0006405~RNA export from nucleus,GO:0006406~mRNA export from nucleus,GO:0006413~translational initiation,GO:0006417~regulation of translation,GO:0010507~negative regulation of autophagy,GO:0016032~viral process,GO:0017148~negative regulation of transla…	GO:0000932~cytoplasmic mRNA processing body,GO:0005737~cytoplasm,GO:0005829~cytosol,GO:0005845~mRNA cap binding complex,GO:0010494~cytoplasmic stress granule,GO:0016281~eukaryotic translation initiation factor 4F complex,GO:0016442~RISC complex,GO:0033391~chromatoid body,GO:0048471~perinuclear region of cytoplasm,GO:0070062~extracellular exosome,	GO:0000339~RNA cap binding,GO:0003743~translation initiation factor activity,GO:0005515~protein binding,GO:0019899~enzyme binding,GO:0031370~eukaryotic initiation factor 4G binding,GO:0044822~poly(A) RNA binding,GO:0070491~repressing transcription factor binding,	hsa03013:RNA transport,hsa04066:HIF-1 signaling pathway,hsa04150:mTOR signaling pathway,hsa04151:PI3K-Akt signaling pathway,hsa04910:Insulin signaling pathway,
A0A087WUT6	EIF5B	0.179014	GO:0006413~translational initiation,GO:0006446~regulation of translational initiation,	GO:0005634~nucleus,GO:0005737~cytoplasm,GO:0005829~cytosol,	GO:0003743~translation initiation factor activity,GO:0003924~GTPase activity,GO:0005515~protein binding,GO:0005525~GTP binding,GO:0044822~poly(A) RNA binding,GO:0046872~metal ion binding,	hsa03013:RNA transport,
F8W717	EML1	0.0212152	GO:0000226~microtubule cytoskeleton organization,GO:0002244~hematopoietic progenitor cell differentiation,GO:0007052~mitotic spindle organization,GO:0007405~neuroblast proliferation,GO:0007420~brain development,	GO:0005829~cytosol,GO:0005874~microtubule,GO:0005875~microtubule associated complex,GO:0048471~perinuclear region of cytoplasm,GO:0097431~mitotic spindle pole,GO:1990023~mitotic spindle midzone,	GO:0005509~calcium ion binding,GO:0005515~protein binding,GO:0008017~microtubule binding,GO:0015631~tubulin binding,
O95834	EML2	0.00125282	GO:0007601~visual perception,GO:0007605~sensory perception of sound,GO:0010968~regulation of microtubule nucleation,GO:0031115~negative regulation of microtubule polymerization,	GO:0005737~cytoplasm,GO:0005819~spindle,GO:0005874~microtubule,GO:0005875~microtubule associated complex,GO:0016021~integral component of membrane,GO:0072686~mitotic spindle,	GO:0005102~receptor binding,GO:0005515~protein binding,GO:0008017~microtubule binding,GO:0008022~protein C-terminus binding,GO:0015631~tubulin binding,
C9J6V3	EML3	0.00244508	GO:0000226~microtubule cytoskeleton organization,	GO:0005737~cytoplasm,GO:0005874~microtubule,GO:0015630~microtubule cytoskeleton,	GO:0008017~microtubule binding,
A0A075B730	EPPK1	0.00848128	GO:0010839~negative regulation of keratinocyte proliferation,GO:0030336~negative regulation of cell migration,GO:0042060~wound healing,GO:0045109~intermediate filament organization,GO:0050680~negative regulation of epithelial cell proliferation,GO:0051548~negative regulation of keratinocyte migration,GO:0061045~negative regulation of wound healing,GO:1905041~regulation of epithelium regeneration,	GO:0005737~cytoplasm,GO:0005856~cytoskeleton,GO:0005923~bicellular tight junction,GO:0030056~hemidesmosome,GO:0045095~keratin filament,GO:0071944~cell periphery,GO:0097356~perinucleolar compartment,	GO:0019215~intermediate filament binding,GO:0044822~poly(A) RNA binding,
K7ELW3	EPS8L1	0.00079606	GO:0007266~Rho protein signal transduction,GO:0035023~regulation of Rho protein signal transduction,GO:0043547~positive regulation of GTPase activity,GO:0098609~cell-cell adhesion,GO:1900029~positive regulation of ruffle assembly,	GO:0005737~cytoplasm,GO:0005913~cell-cell adherens junction,GO:0032587~ruffle membrane,GO:0043234~protein complex,GO:0070062~extracellular exosome,	GO:0003779~actin binding,GO:0005089~Rho guanyl-nucleotide exchange factor activity,GO:0005515~protein binding,GO:0016301~kinase activity,GO:0030676~Rac guanyl-nucleotide exchange factor activity,GO:0042608~T cell receptor binding,GO:0098641~cadherin binding involved in cell-cell adhesion,
B7Z7P8	ETF1	0.0100562	GO:0000184~nuclear-transcribed mRNA catabolic process, nonsense-mediated decay,GO:0006415~translational termination,GO:0006449~regulation of translational termination,GO:0006479~protein methylation,	GO:0005634~nucleus,GO:0005737~cytoplasm,GO:0005829~cytosol,	GO:0003723~RNA binding,GO:0003747~translation release factor activity,GO:0005515~protein binding,GO:0008079~translation termination factor activity,GO:0016149~translation release factor activity, codon specific,GO:0043022~ribosome binding,GO:0044822~poly(A) RNA binding,	hsa03015:mRNA surveillance pathway,
O60645	EXOC3	0.434384	GO:0006887~exocytosis,GO:0015031~protein transport,GO:0051601~exocyst localization,GO:0098609~cell-cell adhesion,	GO:0000145~exocyst,GO:0005829~cytosol,GO:0005913~cell-cell adherens junction,GO:0030667~secretory granule membrane,	GO:0000149~SNARE binding,GO:0005515~protein binding,GO:0098641~cadherin binding involved in cell-cell adhesion,
Q01469	FABP5	0.00312469	GO:0006006~glucose metabolic process,GO:0006629~lipid metabolic process,GO:0006656~phosphatidylcholine biosynthetic process,GO:0008544~epidermis development,GO:0009611~response to wounding,GO:0015758~glucose transport,GO:0019433~triglyceride catabolic process,	GO:0005654~nucleoplasm,GO:0005737~cytoplasm,GO:0005829~cytosol,GO:0070062~extracellular exosome,	GO:0005215~transporter activity,GO:0005504~fatty acid binding,GO:0005515~protein binding,GO:0008289~lipid binding,	hsa03320:PPAR signaling pathway,
D6RBG6	FAF2	0.0725132	GO:0006986~response to unfolded protein,GO:0030433~ER-associated ubiquitin-dependent protein catabolic process,GO:0030970~retrograde protein transport, ER to cytosol,GO:0034389~lipid particle organization,GO:0043086~negative regulation of catalytic activity,	GO:0005783~endoplasmic reticulum,GO:0005811~lipid particle,GO:0034098~VCP-NPL4-UFD1 AAA ATPase complex,	GO:0005515~protein binding,GO:0031625~ubiquitin protein ligase binding,GO:0035473~lipase binding,GO:0043130~ubiquitin binding,GO:0055102~lipase inhibitor activity,
P16930	FAH	0.00612314	GO:0006527~arginine catabolic process,GO:0006559~L-phenylalanine catabolic process,GO:0006572~tyrosine catabolic process,GO:0009072~aromatic amino acid family metabolic process,	GO:0005829~cytosol,GO:0070062~extracellular exosome,	GO:0004334~fumarylacetoacetase activity,GO:0005515~protein binding,GO:0046872~metal ion binding,	hsa00350:Tyrosine metabolism,hsa01100:Metabolic pathways,
Q96C01	FAM136A	0.00734482		GO:0005737~cytoplasm,
A0A3B3ITR6	FARS2	0.00682464	GO:0006418~tRNA aminoacylation for protein translation,GO:0006432~phenylalanyl-tRNA aminoacylation,GO:0008033~tRNA processing,GO:0043039~tRNA aminoacylation,	GO:0005737~cytoplasm,GO:0005739~mitochondrion,GO:0005759~mitochondrial matrix,	GO:0000049~tRNA binding,GO:0000287~magnesium ion binding,GO:0004812~aminoacyl-tRNA ligase activity,GO:0004826~phenylalanine-tRNA ligase activity,GO:0005515~protein binding,GO:0005524~ATP binding,	hsa00970:Aminoacyl-tRNA biosynthesis,
P09467	FBP1	0.113543	GO:0005986~sucrose biosynthetic process,GO:0006000~fructose metabolic process,GO:0006001~fructose catabolic process,GO:0006002~fructose 6-phosphate metabolic process,GO:0006094~gluconeogenesis,GO:0006111~regulation of gluconeogenesis,GO:0016311~dephosphorylation,GO:0030308~negative regulation of cell growth,GO:0030388~fructose 1,6-bisphosphate metabolic process,GO:0035690~cellular response to dru…	GO:0005737~cytoplasm,GO:0005829~cytosol,GO:0070062~extracellular exosome,	GO:0005515~protein binding,GO:0016208~AMP binding,GO:0042132~fructose 1,6-bisphosphate 1-phosphatase activity,GO:0042802~identical protein binding,GO:0046872~metal ion binding,GO:0048029~monosaccharide binding,	hsa00010:Glycolysis / Gluconeogenesis,hsa00030:Pentose phosphate pathway,hsa00051:Fructose and mannose metabolism,hsa01100:Metabolic pathways,hsa01130:Biosynthesis of antibiotics,hsa01200:Carbon metabolism,hsa04152:AMPK signaling pathway,hsa04910:Insulin signaling pathway,
J3KQ72	FBXO6	4.95799e-05	GO:0000077~DNA damage checkpoint,GO:0000209~protein polyubiquitination,GO:0006281~DNA repair,GO:0006508~proteolysis,GO:0006516~glycoprotein catabolic process,GO:0006986~response to unfolded protein,GO:0030433~ER-associated ubiquitin-dependent protein catabolic process,GO:0031146~SCF-dependent proteasomal ubiquitin-dependent protein catabolic process,	GO:0005737~cytoplasm,GO:0005829~cytosol,GO:0019005~SCF ubiquitin ligase complex,GO:0044322~endoplasmic reticulum quality control compartment,	GO:0001948~glycoprotein binding,GO:0004842~ubiquitin-protein transferase activity,GO:0005515~protein binding,GO:0030246~carbohydrate binding,GO:0061630~ubiquitin protein ligase activity,	hsa04141:Protein processing in endoplasmic reticulum,
A0A0A0MTR6	FDXR	0.471978	GO:0006091~generation of precursor metabolites and energy,GO:0006694~steroid biosynthetic process,GO:0006700~C21-steroid hormone biosynthetic process,GO:0008203~cholesterol metabolic process,GO:0016125~sterol metabolic process,GO:0055114~oxidation-reduction process,GO:0070995~NADPH oxidation,	GO:0005739~mitochondrion,GO:0005743~mitochondrial inner membrane,GO:0005759~mitochondrial matrix,	GO:0004324~ferredoxin-NADP+ reductase activity,GO:0005515~protein binding,GO:0015039~NADPH-adrenodoxin reductase activity,GO:0016491~oxidoreductase activity,GO:0070402~NADPH binding,
P07954	FH	0.0305568	GO:0006099~tricarboxylic acid cycle,GO:0006106~fumarate metabolic process,GO:0006108~malate metabolic process,GO:0048873~homeostasis of number of cells within a tissue,GO:0051262~protein tetramerization,	GO:0005737~cytoplasm,GO:0005739~mitochondrion,GO:0005759~mitochondrial matrix,GO:0005829~cytosol,GO:0045239~tricarboxylic acid cycle enzyme complex,GO:0070062~extracellular exosome,	GO:0003824~catalytic activity,GO:0004333~fumarate hydratase activity,GO:0005515~protein binding,GO:0016829~lyase activity,	hsa00020:Citrate cycle (TCA cycle),hsa00620:Pyruvate metabolism,hsa01100:Metabolic pathways,hsa01130:Biosynthesis of antibiotics,hsa01200:Carbon metabolism,hsa05200:Pathways in cancer,hsa05211:Renal cell carcinoma,
Q96AY3	FKBP10	0.00180263	GO:0000413~protein peptidyl-prolyl isomerization,GO:0006457~protein folding,GO:0061077~chaperone-mediated protein folding,	GO:0005788~endoplasmic reticulum lumen,GO:0005789~endoplasmic reticulum membrane,	GO:0003755~peptidyl-prolyl cis-trans isomerase activity,GO:0005509~calcium ion binding,GO:0005528~FK506 binding,
Q9Y680	FKBP7	0.29768	GO:0000413~protein peptidyl-prolyl isomerization,GO:0006457~protein folding,GO:0061077~chaperone-mediated protein folding,	GO:0005788~endoplasmic reticulum lumen,GO:0005789~endoplasmic reticulum membrane,	GO:0003755~peptidyl-prolyl cis-trans isomerase activity,GO:0005509~calcium ion binding,GO:0005515~protein binding,GO:0005528~FK506 binding,
O95302	FKBP9	0.00486807	GO:0000413~protein peptidyl-prolyl isomerization,GO:0006457~protein folding,GO:0061077~chaperone-mediated protein folding,	GO:0005783~endoplasmic reticulum,GO:0005789~endoplasmic reticulum membrane,	GO:0003755~peptidyl-prolyl cis-trans isomerase activity,GO:0005509~calcium ion binding,GO:0005528~FK506 binding,
Q8NFF5	FLAD1	2.42082e-05	GO:0006747~FAD biosynthetic process,GO:0006771~riboflavin metabolic process,GO:0008152~metabolic process,	GO:0005737~cytoplasm,GO:0005759~mitochondrial matrix,GO:0005829~cytosol,GO:0005886~plasma membrane,	GO:0003824~catalytic activity,GO:0003919~FMN adenylyltransferase activity,GO:0005515~protein binding,GO:0005524~ATP binding,	hsa00740:Riboflavin metabolism,hsa01100:Metabolic pathways,
Q9UN86	G3BP2	0.289838	GO:0006810~transport,GO:0007253~cytoplasmic sequestering of NF-kappaB,GO:0007265~Ras protein signal transduction,GO:0051028~mRNA transport,	GO:0005622~intracellular,GO:0005737~cytoplasm,GO:0005829~cytosol,GO:0030529~intracellular ribonucleoprotein complex,	GO:0000166~nucleotide binding,GO:0003676~nucleic acid binding,GO:0003729~mRNA binding,GO:0005515~protein binding,GO:0030159~receptor signaling complex scaffold activity,GO:0044822~poly(A) RNA binding,
Q5QPP1	GALE	6.78817e-05	GO:0006012~galactose metabolic process,GO:0019388~galactose catabolic process,	GO:0005829~cytosol,GO:0070062~extracellular exosome,	GO:0003974~UDP-N-acetylglucosamine 4-epimerase activity,GO:0003978~UDP-glucose 4-epimerase activity,GO:0042802~identical protein binding,GO:0042803~protein homodimerization activity,GO:0050662~coenzyme binding,	hsa00052:Galactose metabolism,hsa00520:Amino sugar and nucleotide sugar metabolism,hsa01100:Metabolic pathways,
Q96C23	GALM	0.00615012	GO:0005975~carbohydrate metabolic process,GO:0006006~glucose metabolic process,GO:0006012~galactose metabolic process,GO:0033499~galactose catabolic process via UDP-galactose,	GO:0005737~cytoplasm,GO:0070062~extracellular exosome,	GO:0004034~aldose 1-epimerase activity,GO:0016853~isomerase activity,GO:0030246~carbohydrate binding,	hsa00010:Glycolysis / Gluconeogenesis,hsa00052:Galactose metabolism,hsa01100:Metabolic pathways,hsa01130:Biosynthesis of antibiotics,
P22102	GART	0.000615433	GO:0003360~brainstem development,GO:0006189~'de novo' IMP biosynthetic process,GO:0006544~glycine metabolic process,GO:0009113~purine nucleobase biosynthetic process,GO:0009168~purine ribonucleoside monophosphate biosynthetic process,GO:0010033~response to organic substance,GO:0010035~response to inorganic substance,GO:0021549~cerebellum development,GO:0021987~cerebral cortex development,GO:00466…	GO:0005737~cytoplasm,GO:0005829~cytosol,GO:0016021~integral component of membrane,GO:0070062~extracellular exosome,	GO:0003824~catalytic activity,GO:0004637~phosphoribosylamine-glycine ligase activity,GO:0004641~phosphoribosylformylglycinamidine cyclo-ligase activity,GO:0004644~phosphoribosylglycinamide formyltransferase activity,GO:0005524~ATP binding,GO:0016740~transferase activity,GO:0046872~metal ion binding,	hsa00230:Purine metabolism,hsa00670:One carbon pool by folate,hsa01100:Metabolic pathways,hsa01130:Biosynthesis of antibiotics,
Q04446	GBE1	0.000757343	GO:0005977~glycogen metabolic process,GO:0005978~glycogen biosynthetic process,GO:0006091~generation of precursor metabolites and energy,	GO:0005829~cytosol,GO:0070062~extracellular exosome,	GO:0003844~1,4-alpha-glucan branching enzyme activity,GO:0004553~hydrolase activity, hydrolyzing O-glycosyl compounds,GO:0030246~carbohydrate binding,GO:0043169~cation binding,	hsa00500:Starch and sucrose metabolism,hsa01100:Metabolic pathways,
B4E2I4	GCLC	0.00245905	GO:0000096~sulfur amino acid metabolic process,GO:0006534~cysteine metabolic process,GO:0006536~glutamate metabolic process,GO:0006750~glutathione biosynthetic process,GO:0006979~response to oxidative stress,GO:0007568~aging,GO:0007584~response to nutrient,GO:0008637~apoptotic mitochondrial changes,GO:0009408~response to heat,GO:0009410~response to xenobiotic stimulus,GO:0009725~response to hormo…	GO:0005829~cytosol,GO:0016021~integral component of membrane,GO:0017109~glutamate-cysteine ligase complex,	GO:0000287~magnesium ion binding,GO:0004357~glutamate-cysteine ligase activity,GO:0005524~ATP binding,GO:0016595~glutamate binding,GO:0043531~ADP binding,GO:0046982~protein heterodimerization activity,GO:0050662~coenzyme binding,	hsa00480:Glutathione metabolism,hsa01100:Metabolic pathways,
Q9Y2T3	GDA	0.00181876	GO:0006139~nucleobase-containing compound metabolic process,GO:0006147~guanine catabolic process,GO:0006195~purine nucleotide catabolic process,GO:0007399~nervous system development,GO:0046098~guanine metabolic process,	GO:0005622~intracellular,GO:0005829~cytosol,GO:0070062~extracellular exosome,	GO:0008270~zinc ion binding,GO:0008892~guanine deaminase activity,	hsa00230:Purine metabolism,hsa01100:Metabolic pathways,
O75223	GGCT	0.00338869	GO:0001836~release of cytochrome c from mitochondria,GO:0006750~glutathione biosynthetic process,	GO:0005829~cytosol,GO:0070062~extracellular exosome,	GO:0003839~gamma-glutamylcyclotransferase activity,GO:0042803~protein homodimerization activity,	hsa00480:Glutathione metabolism,
Q8TF65	GIPC2	0.00627599		GO:0005737~cytoplasm,GO:0070062~extracellular exosome,	GO:0005515~protein binding,
Q04760	GLO1	0.00358975	GO:0005975~carbohydrate metabolic process,GO:0006090~pyruvate metabolic process,GO:0006357~regulation of transcription from RNA polymerase II promoter,GO:0006749~glutathione metabolic process,GO:0009438~methylglyoxal metabolic process,GO:0030316~osteoclast differentiation,GO:0043066~negative regulation of apoptotic process,	GO:0005737~cytoplasm,GO:0005829~cytosol,GO:0070062~extracellular exosome,	GO:0004462~lactoylglutathione lyase activity,GO:0008270~zinc ion binding,	hsa00620:Pyruvate metabolism,
O94925	GLS	0.162792	GO:0001967~suckling behavior,GO:0002087~regulation of respiratory gaseous exchange by neurological system process,GO:0006537~glutamate biosynthetic process,GO:0006541~glutamine metabolic process,GO:0006543~glutamine catabolic process,GO:0007268~chemical synaptic transmission,GO:0008652~cellular amino acid biosynthetic process,GO:0014047~glutamate secretion,GO:0051289~protein homotetramerization,	GO:0005739~mitochondrion,GO:0005759~mitochondrial matrix,GO:0005829~cytosol,	GO:0004359~glutaminase activity,GO:0005515~protein binding,	hsa00220:Arginine biosynthesis,hsa00250:Alanine, aspartate and glutamate metabolism,hsa00471:D-Glutamine and D-glutamate metabolism,hsa01100:Metabolic pathways,hsa04724:Glutamatergic synapse,hsa04727:GABAergic synapse,hsa04964:Proximal tubule bicarbonate reclamation,hsa05206:MicroRNAs in cancer,hsa05230:Central carbon metabolism in cancer,
P00367	GLUD1	0.03992	GO:0006520~cellular amino acid metabolic process,GO:0006537~glutamate biosynthetic process,GO:0006538~glutamate catabolic process,GO:0006541~glutamine metabolic process,GO:0008652~cellular amino acid biosynthetic process,GO:0021762~substantia nigra development,GO:0032024~positive regulation of insulin secretion,GO:0055114~oxidation-reduction process,GO:0072350~tricarboxylic acid metabolic process,	GO:0005737~cytoplasm,GO:0005739~mitochondrion,GO:0005759~mitochondrial matrix,	GO:0004352~glutamate dehydrogenase (NAD+) activity,GO:0004353~glutamate dehydrogenase [NAD(P)+] activity,GO:0005515~protein binding,GO:0005524~ATP binding,GO:0005525~GTP binding,GO:0042802~identical protein binding,GO:0043531~ADP binding,GO:0070403~NAD+ binding,GO:0070728~leucine binding,	hsa00220:Arginine biosynthesis,hsa00250:Alanine, aspartate and glutamate metabolism,hsa00471:D-Glutamine and D-glutamate metabolism,hsa00910:Nitrogen metabolism,hsa01100:Metabolic pathways,hsa01200:Carbon metabolism,hsa04964:Proximal tubule bicarbonate reclamation,
O60547	GMDS	0.0186128	GO:0007219~Notch signaling pathway,GO:0019673~GDP-mannose metabolic process,GO:0042351~'de novo' GDP-L-fucose biosynthetic process,	GO:0005737~cytoplasm,GO:0005829~cytosol,GO:0070062~extracellular exosome,	GO:0005515~protein binding,GO:0008446~GDP-mannose 4,6-dehydratase activity,GO:0042802~identical protein binding,GO:0070401~NADP+ binding,	hsa00051:Fructose and mannose metabolism,hsa00520:Amino sugar and nucleotide sugar metabolism,hsa01100:Metabolic pathways,
Q96IJ6	GMPPA	8.14505e-05	GO:0009058~biosynthetic process,	GO:0005737~cytoplasm,GO:0070062~extracellular exosome,	GO:0005515~protein binding,GO:0016740~transferase activity,GO:0016779~nucleotidyltransferase activity,	hsa00051:Fructose and mannose metabolism,hsa00520:Amino sugar and nucleotide sugar metabolism,hsa01100:Metabolic pathways,
P36959	GMPR	0.0419713	GO:0006144~purine nucleobase metabolic process,GO:0006163~purine nucleotide metabolic process,GO:0009409~response to cold,GO:0015951~purine ribonucleotide interconversion,GO:0043101~purine-containing compound salvage,GO:0055114~oxidation-reduction process,	GO:0005737~cytoplasm,GO:0005829~cytosol,GO:1902560~GMP reductase complex,	GO:0003920~GMP reductase activity,GO:0046872~metal ion binding,	hsa00230:Purine metabolism,
H0YMB3	GMPR2	0.933578	GO:0006144~purine nucleobase metabolic process,GO:0006163~purine nucleotide metabolic process,GO:0015951~purine ribonucleotide interconversion,GO:0043101~purine-containing compound salvage,GO:0046037~GMP metabolic process,GO:0055114~oxidation-reduction process,	GO:0005737~cytoplasm,GO:0005829~cytosol,GO:1902560~GMP reductase complex,	GO:0003824~catalytic activity,GO:0003920~GMP reductase activity,GO:0016491~oxidoreductase activity,GO:0046872~metal ion binding,	hsa00230:Purine metabolism,
P49915	GMPS	0.0258038	GO:0006177~GMP biosynthetic process,GO:0006541~glutamine metabolic process,GO:0009113~purine nucleobase biosynthetic process,GO:0009168~purine ribonucleoside monophosphate biosynthetic process,	GO:0005737~cytoplasm,GO:0005829~cytosol,	GO:0003921~GMP synthase activity,GO:0003922~GMP synthase (glutamine-hydrolyzing) activity,GO:0005524~ATP binding,GO:0016462~pyrophosphatase activity,	hsa00230:Purine metabolism,hsa00983:Drug metabolism - other enzymes,hsa01100:Metabolic pathways,
D6R9P4	GNPDA1	0.983075	GO:0005975~carbohydrate metabolic process,GO:0006006~glucose metabolic process,GO:0006043~glucosamine catabolic process,GO:0006044~N-acetylglucosamine metabolic process,GO:0006046~N-acetylglucosamine catabolic process,GO:0006048~UDP-N-acetylglucosamine biosynthetic process,GO:0006091~generation of precursor metabolites and energy,GO:0007338~single fertilization,GO:0019262~N-acetylneuraminate cata…	GO:0005737~cytoplasm,GO:0005829~cytosol,GO:0070062~extracellular exosome,	GO:0004342~glucosamine-6-phosphate deaminase activity,GO:0005515~protein binding,GO:0016787~hydrolase activity,	hsa00520:Amino sugar and nucleotide sugar metabolism,hsa01100:Metabolic pathways,
Q96EK6	GNPNAT1	1.13423e-05	GO:0001889~liver development,GO:0006041~glucosamine metabolic process,GO:0006044~N-acetylglucosamine metabolic process,GO:0006048~UDP-N-acetylglucosamine biosynthetic process,	GO:0000139~Golgi membrane,GO:0005770~late endosome,GO:0005793~endoplasmic reticulum-Golgi intermediate compartment,GO:0005794~Golgi apparatus,GO:0005829~cytosol,GO:0010008~endosome membrane,	GO:0004343~glucosamine 6-phosphate N-acetyltransferase activity,GO:0008080~N-acetyltransferase activity,GO:0042802~identical protein binding,GO:0048029~monosaccharide binding,	hsa00520:Amino sugar and nucleotide sugar metabolism,
A0A2Q2TH77	GOLGA2	0.0207461	GO:0006486~protein glycosylation,GO:0006888~ER to Golgi vesicle-mediated transport,GO:0007020~microtubule nucleation,GO:0008356~asymmetric cell division,GO:0010507~negative regulation of autophagy,GO:0032091~negative regulation of protein binding,GO:0048208~COPII vesicle coating,GO:0051225~spindle assembly,GO:0051289~protein homotetramerization,GO:0051297~centrosome organization,GO:0060050~positi…	GO:0000137~Golgi cis cisterna,GO:0000139~Golgi membrane,GO:0000922~spindle pole,GO:0005634~nucleus,GO:0005794~Golgi apparatus,GO:0005801~cis-Golgi network,GO:0005874~microtubule,GO:0005913~cell-cell adherens junction,GO:0030134~ER to Golgi transport vesicle,GO:0032580~Golgi cisterna membrane,GO:0033116~endoplasmic reticulum-Golgi intermediate compartment membrane,GO:0072686~mitotic spindle,	GO:0005515~protein binding,GO:0008017~microtubule binding,GO:0019901~protein kinase binding,GO:0019905~syntaxin binding,GO:0061676~importin-alpha family protein binding,GO:0098641~cadherin binding involved in cell-cell adhesion,
Q5T5I6	GOLPH3L	0.0241057	GO:0006890~retrograde vesicle-mediated transport, Golgi to ER,GO:0007030~Golgi organization,GO:0043001~Golgi to plasma membrane protein transport,GO:0048193~Golgi vesicle transport,GO:0048194~Golgi vesicle budding,GO:0050714~positive regulation of protein secretion,	GO:0000139~Golgi membrane,GO:0005802~trans-Golgi network,GO:0005829~cytosol,GO:0031985~Golgi cisterna,GO:0032580~Golgi cisterna membrane,GO:0032588~trans-Golgi network membrane,	GO:0005515~protein binding,GO:0070273~phosphatidylinositol-4-phosphate binding,
P43304	GPD2	0.037805	GO:0006072~glycerol-3-phosphate metabolic process,GO:0006094~gluconeogenesis,GO:0019563~glycerol catabolic process,GO:0035264~multicellular organism growth,GO:0043010~camera-type eye development,GO:0044255~cellular lipid metabolic process,GO:0055114~oxidation-reduction process,	GO:0005743~mitochondrial inner membrane,GO:0009331~glycerol-3-phosphate dehydrogenase complex,GO:0016021~integral component of membrane,	GO:0004368~glycerol-3-phosphate dehydrogenase activity,GO:0005509~calcium ion binding,GO:0052591~sn-glycerol-3-phosphate:ubiquinone-8 oxidoreductase activity,	hsa00564:Glycerophospholipid metabolism,
Q9UBQ7	GRHPR	0.00276968	GO:0007588~excretion,GO:0008152~metabolic process,GO:0043648~dicarboxylic acid metabolic process,GO:0046487~glyoxylate metabolic process,GO:0051259~protein oligomerization,GO:0055114~oxidation-reduction process,	GO:0005737~cytoplasm,GO:0005782~peroxisomal matrix,GO:0005829~cytosol,GO:0070062~extracellular exosome,	GO:0008465~glycerate dehydrogenase activity,GO:0016616~oxidoreductase activity, acting on the CH-OH group of donors, NAD or NADP as acceptor,GO:0016618~hydroxypyruvate reductase activity,GO:0030267~glyoxylate reductase (NADP) activity,GO:0031406~carboxylic acid binding,GO:0042803~protein homodimerization activity,GO:0051287~NAD binding,GO:0070402~NADPH binding,	hsa00260:Glycine, serine and threonine metabolism,hsa00620:Pyruvate metabolism,hsa00630:Glyoxylate and dicarboxylate metabolism,hsa01100:Metabolic pathways,
Q8IYD1	GSPT2	0.00151125	GO:0000184~nuclear-transcribed mRNA catabolic process, nonsense-mediated decay,GO:0002184~cytoplasmic translational termination,GO:0006415~translational termination,GO:0007049~cell cycle,	GO:0005829~cytosol,GO:0018444~translation release factor complex,	GO:0003747~translation release factor activity,GO:0003924~GTPase activity,GO:0005515~protein binding,GO:0005525~GTP binding,GO:0044822~poly(A) RNA binding,	hsa03015:mRNA surveillance pathway,
A0A2R8Y430	GSS	0.00137614	GO:0006520~cellular amino acid metabolic process,GO:0006750~glutathione biosynthetic process,GO:0006979~response to oxidative stress,GO:0007399~nervous system development,GO:0007568~aging,GO:0009410~response to xenobiotic stimulus,GO:0031667~response to nutrient levels,GO:0034612~response to tumor necrosis factor,GO:0043200~response to amino acid,GO:0046686~response to cadmium ion,	GO:0005829~cytosol,GO:0070062~extracellular exosome,	GO:0000287~magnesium ion binding,GO:0004363~glutathione synthase activity,GO:0005515~protein binding,GO:0005524~ATP binding,GO:0016594~glycine binding,GO:0042802~identical protein binding,GO:0042803~protein homodimerization activity,GO:0043295~glutathione binding,	hsa00480:Glutathione metabolism,hsa01100:Metabolic pathways,
Q5TA02	GSTO1	0.193213	GO:0006749~glutathione metabolic process,GO:0008152~metabolic process,GO:0010880~regulation of release of sequestered calcium ion into cytosol by sarcoplasmic reticulum,GO:0010881~regulation of cardiac muscle contraction by regulation of the release of sequestered calcium ion,GO:0014810~positive regulation of skeletal muscle contraction by regulation of release of sequestered calcium ion,GO:00198…	GO:0005737~cytoplasm,GO:0005829~cytosol,GO:0070062~extracellular exosome,	GO:0004364~glutathione transferase activity,GO:0005515~protein binding,GO:0016491~oxidoreductase activity,GO:0045174~glutathione dehydrogenase (ascorbate) activity,GO:0050610~methylarsonate reductase activity,	hsa00480:Glutathione metabolism,hsa00980:Metabolism of xenobiotics by cytochrome P450,hsa00982:Drug metabolism - cytochrome P450,hsa05204:Chemical carcinogenesis,
Q6ICJ4	GSTT2B	0.0546954	GO:0006749~glutathione metabolic process,GO:1901687~glutathione derivative biosynthetic process,	GO:0005737~cytoplasm,GO:0005829~cytosol,GO:0070062~extracellular exosome,	GO:0004364~glutathione transferase activity,GO:0016740~transferase activity,	hsa00480:Glutathione metabolism,hsa00980:Metabolism of xenobiotics by cytochrome P450,hsa00982:Drug metabolism - cytochrome P450,hsa05204:Chemical carcinogenesis,
Q16774	GUK1	0.00160384	GO:0006163~purine nucleotide metabolic process,GO:0006185~dGDP biosynthetic process,GO:0015949~nucleobase-containing small molecule interconversion,GO:0019673~GDP-mannose metabolic process,GO:0034436~glycoprotein transport,GO:0046034~ATP metabolic process,GO:0046037~GMP metabolic process,GO:0046054~dGMP metabolic process,GO:0046060~dATP metabolic process,GO:0046711~GDP biosynthetic process,GO:004…	GO:0005829~cytosol,	GO:0004385~guanylate kinase activity,GO:0005524~ATP binding,	hsa00230:Purine metabolism,hsa01100:Metabolic pathways,
O95479	H6PD	0.309326	GO:0006006~glucose metabolic process,GO:0006098~pentose-phosphate shunt,GO:0055114~oxidation-reduction process,GO:0097305~response to alcohol,	GO:0005739~mitochondrion,GO:0005788~endoplasmic reticulum lumen,	GO:0004345~glucose-6-phosphate dehydrogenase activity,GO:0017057~6-phosphogluconolactonase activity,GO:0030246~carbohydrate binding,GO:0047936~glucose 1-dehydrogenase [NAD(P)] activity,GO:0050661~NADP binding,	hsa00030:Pentose phosphate pathway,hsa01100:Metabolic pathways,hsa01200:Carbon metabolism,
P40939	HADHA	0.00158614	GO:0006631~fatty acid metabolic process,GO:0006635~fatty acid beta-oxidation,GO:0032868~response to insulin,GO:0035965~cardiolipin acyl-chain remodeling,GO:0042493~response to drug,	GO:0005739~mitochondrion,GO:0005743~mitochondrial inner membrane,GO:0016507~mitochondrial fatty acid beta-oxidation multienzyme complex,GO:0031012~extracellular matrix,GO:0042645~mitochondrial nucleoid,	GO:0000062~fatty-acyl-CoA binding,GO:0003857~3-hydroxyacyl-CoA dehydrogenase activity,GO:0003985~acetyl-CoA C-acetyltransferase activity,GO:0003988~acetyl-CoA C-acyltransferase activity,GO:0004300~enoyl-CoA hydratase activity,GO:0005515~protein binding,GO:0016508~long-chain-enoyl-CoA hydratase activity,GO:0016509~long-chain-3-hydroxyacyl-CoA dehydrogenase activity,GO:0032403~protein complex bindi…	hsa00062:Fatty acid elongation,hsa00071:Fatty acid degradation,hsa00280:Valine, leucine and isoleucine degradation,hsa00310:Lysine degradation,hsa00380:Tryptophan metabolism,hsa00410:beta-Alanine metabolism,hsa00640:Propanoate metabolism,hsa00650:Butanoate metabolism,hsa01040:Biosynthesis of unsaturated fatty acids,hsa01100:Metabolic pathways,hsa01130:Biosynthesis of antibiotics,hsa01200:Carbon m…
P55084	HADHB	0.000609463	GO:0006635~fatty acid beta-oxidation,GO:0008152~metabolic process,GO:0035965~cardiolipin acyl-chain remodeling,	GO:0005739~mitochondrion,GO:0005740~mitochondrial envelope,GO:0005741~mitochondrial outer membrane,GO:0005743~mitochondrial inner membrane,GO:0005783~endoplasmic reticulum,GO:0042645~mitochondrial nucleoid,GO:0070062~extracellular exosome,	GO:0003857~3-hydroxyacyl-CoA dehydrogenase activity,GO:0003988~acetyl-CoA C-acyltransferase activity,GO:0004300~enoyl-CoA hydratase activity,GO:0005515~protein binding,GO:0016509~long-chain-3-hydroxyacyl-CoA dehydrogenase activity,GO:0016747~transferase activity, transferring acyl groups other than amino-acyl groups,GO:0044822~poly(A) RNA binding,	hsa00062:Fatty acid elongation,hsa00071:Fatty acid degradation,hsa00280:Valine, leucine and isoleucine degradation,hsa01100:Metabolic pathways,hsa01130:Biosynthesis of antibiotics,hsa01212:Fatty acid metabolism,
H3BPK3	HAGH	0.00170151	GO:0006090~pyruvate metabolic process,GO:0006750~glutathione biosynthetic process,GO:0019243~methylglyoxal catabolic process to D-lactate via S-lactoyl-glutathione,	GO:0005737~cytoplasm,GO:0005759~mitochondrial matrix,GO:0005829~cytosol,GO:0070062~extracellular exosome,	GO:0004416~hydroxyacylglutathione hydrolase activity,GO:0005515~protein binding,GO:0046872~metal ion binding,	hsa00620:Pyruvate metabolism,
P69891	HBG1	0.000135078	GO:0007596~blood coagulation,GO:0015671~oxygen transport,	GO:0005829~cytosol,GO:0005833~hemoglobin complex,	GO:0005344~oxygen transporter activity,GO:0005506~iron ion binding,GO:0019825~oxygen binding,GO:0020037~heme binding,
Q9Y5Z4	HEBP2	9.24676e-05	GO:0010917~negative regulation of mitochondrial membrane potential,GO:0010940~positive regulation of necrotic cell death,GO:0035794~positive regulation of mitochondrial membrane permeability,GO:1901031~regulation of response to reactive oxygen species,	GO:0005737~cytoplasm,GO:0005739~mitochondrion,GO:0070062~extracellular exosome,	GO:0005515~protein binding,
Q93099	HGD	0.00113585	GO:0006559~L-phenylalanine catabolic process,GO:0006570~tyrosine metabolic process,GO:0006572~tyrosine catabolic process,GO:0055114~oxidation-reduction process,	GO:0005829~cytosol,GO:0070062~extracellular exosome,	GO:0004411~homogentisate 1,2-dioxygenase activity,GO:0005515~protein binding,GO:0042802~identical protein binding,GO:0046872~metal ion binding,	hsa00350:Tyrosine metabolism,hsa01100:Metabolic pathways,
P35914	HMGCL	0.000522384	GO:0001889~liver development,GO:0006552~leucine catabolic process,GO:0006629~lipid metabolic process,GO:0006637~acyl-CoA metabolic process,GO:0007005~mitochondrion organization,GO:0007584~response to nutrient,GO:0042594~response to starvation,GO:0046951~ketone body biosynthetic process,GO:0051262~protein tetramerization,GO:0070542~response to fatty acid,	GO:0005739~mitochondrion,GO:0005743~mitochondrial inner membrane,GO:0005759~mitochondrial matrix,GO:0005777~peroxisome,	GO:0000062~fatty-acyl-CoA binding,GO:0000287~magnesium ion binding,GO:0004419~hydroxymethylglutaryl-CoA lyase activity,GO:0005102~receptor binding,GO:0016829~lyase activity,GO:0030145~manganese ion binding,GO:0031406~carboxylic acid binding,GO:0042803~protein homodimerization activity,GO:0046872~metal ion binding,	hsa00072:Synthesis and degradation of ketone bodies,hsa00280:Valine, leucine and isoleucine degradation,hsa00650:Butanoate metabolism,hsa01100:Metabolic pathways,hsa04146:Peroxisome,
K7ENU5	HOOK2	0.400869	GO:0006897~endocytosis,GO:0007032~endosome organization,GO:0007040~lysosome organization,GO:0008333~endosome to lysosome transport,GO:0015031~protein transport,GO:0045022~early endosome to late endosome transport,	GO:0005813~centrosome,GO:0005829~cytosol,GO:0005874~microtubule,GO:0030897~HOPS complex,GO:0070695~FHF complex,	GO:0005515~protein binding,GO:0042802~identical protein binding,
P00492	HPRT1	0.545233	GO:0001975~response to amphetamine,GO:0006164~purine nucleotide biosynthetic process,GO:0006166~purine ribonucleoside salvage,GO:0006168~adenine salvage,GO:0006178~guanine salvage,GO:0007625~grooming behavior,GO:0007626~locomotory behavior,GO:0019835~cytolysis,GO:0021756~striatum development,GO:0021895~cerebral cortex neuron differentiation,GO:0021954~central nervous system neuron development,GO:…	GO:0005737~cytoplasm,GO:0005829~cytosol,GO:0070062~extracellular exosome,	GO:0000166~nucleotide binding,GO:0000287~magnesium ion binding,GO:0004422~hypoxanthine phosphoribosyltransferase activity,GO:0005515~protein binding,GO:0042802~identical protein binding,GO:0042803~protein homodimerization activity,GO:0052657~guanine phosphoribosyltransferase activity,	hsa00230:Purine metabolism,hsa00983:Drug metabolism - other enzymes,hsa01100:Metabolic pathways,
P34932	HSPA4	0.000146369	GO:0006986~response to unfolded protein,GO:0045040~protein import into mitochondrial outer membrane,GO:0051131~chaperone-mediated protein complex assembly,	GO:0005829~cytosol,GO:0070062~extracellular exosome,	GO:0005515~protein binding,GO:0005524~ATP binding,	hsa04612:Antigen processing and presentation,
P17066	HSPA6	0.0108326	GO:0006986~response to unfolded protein,GO:0034605~cellular response to heat,GO:0042026~protein refolding,GO:0070370~cellular heat acclimation,	GO:0005737~cytoplasm,GO:0005814~centriole,GO:0005829~cytosol,GO:0008180~COP9 signalosome,GO:0070062~extracellular exosome,GO:0072562~blood microparticle,	GO:0005515~protein binding,GO:0005524~ATP binding,GO:0019899~enzyme binding,GO:0031072~heat shock protein binding,GO:0042623~ATPase activity, coupled,GO:0051082~unfolded protein binding,	hsa03040:Spliceosome,hsa04010:MAPK signaling pathway,hsa04141:Protein processing in endoplasmic reticulum,hsa04144:Endocytosis,hsa04612:Antigen processing and presentation,hsa04915:Estrogen signaling pathway,hsa05134:Legionellosis,hsa05145:Toxoplasmosis,hsa05162:Measles,hsa05164:Influenza A,
Q9NSE4	IARS2	0.000716689	GO:0006418~tRNA aminoacylation for protein translation,GO:0006428~isoleucyl-tRNA aminoacylation,GO:0006450~regulation of translational fidelity,	GO:0005737~cytoplasm,GO:0005739~mitochondrion,GO:0005759~mitochondrial matrix,GO:0005829~cytosol,GO:0016021~integral component of membrane,	GO:0000049~tRNA binding,GO:0002161~aminoacyl-tRNA editing activity,GO:0004822~isoleucine-tRNA ligase activity,GO:0005524~ATP binding,	hsa00970:Aminoacyl-tRNA biosynthesis,
O75874	IDH1	0.000216137	GO:0006097~glyoxylate cycle,GO:0006099~tricarboxylic acid cycle,GO:0006102~isocitrate metabolic process,GO:0006103~2-oxoglutarate metabolic process,GO:0006740~NADPH regeneration,GO:0006749~glutathione metabolic process,GO:0006979~response to oxidative stress,GO:0008585~female gonad development,GO:0048545~response to steroid hormone,GO:0060696~regulation of phospholipid catabolic process,GO:007107…	GO:0005737~cytoplasm,GO:0005739~mitochondrion,GO:0005777~peroxisome,GO:0005782~peroxisomal matrix,GO:0005829~cytosol,GO:0005913~cell-cell adherens junction,GO:0070062~extracellular exosome,	GO:0000287~magnesium ion binding,GO:0004450~isocitrate dehydrogenase (NADP+) activity,GO:0005102~receptor binding,GO:0042803~protein homodimerization activity,GO:0050661~NADP binding,GO:0051287~NAD binding,GO:0051990~(R)-2-hydroxyglutarate dehydrogenase activity,GO:0098641~cadherin binding involved in cell-cell adhesion,	hsa00020:Citrate cycle (TCA cycle),hsa00480:Glutathione metabolism,hsa01100:Metabolic pathways,hsa01130:Biosynthesis of antibiotics,hsa01200:Carbon metabolism,hsa01210:2-Oxocarboxylic acid metabolism,hsa01230:Biosynthesis of amino acids,hsa04146:Peroxisome,
P48735	IDH2	1.74842e-06	GO:0005975~carbohydrate metabolic process,GO:0006097~glyoxylate cycle,GO:0006099~tricarboxylic acid cycle,GO:0006102~isocitrate metabolic process,GO:0006103~2-oxoglutarate metabolic process,	GO:0005739~mitochondrion,GO:0005743~mitochondrial inner membrane,GO:0005759~mitochondrial matrix,GO:0005777~peroxisome,GO:0005829~cytosol,GO:0070062~extracellular exosome,	GO:0000287~magnesium ion binding,GO:0004450~isocitrate dehydrogenase (NADP+) activity,GO:0051287~NAD binding,	hsa00020:Citrate cycle (TCA cycle),hsa00480:Glutathione metabolism,hsa01100:Metabolic pathways,hsa01130:Biosynthesis of antibiotics,hsa01200:Carbon metabolism,hsa01210:2-Oxocarboxylic acid metabolism,hsa01230:Biosynthesis of amino acids,hsa04146:Peroxisome,
C9JD53	IDI1	0.252083	GO:0006695~cholesterol biosynthetic process,GO:0008299~isoprenoid biosynthetic process,GO:0009240~isopentenyl diphosphate biosynthetic process,GO:0050992~dimethylallyl diphosphate biosynthetic process,	GO:0005777~peroxisome,GO:0005829~cytosol,	GO:0000287~magnesium ion binding,GO:0004452~isopentenyl-diphosphate delta-isomerase activity,GO:0016787~hydrolase activity,GO:0030145~manganese ion binding,GO:0046872~metal ion binding,	hsa00900:Terpenoid backbone biosynthesis,hsa01100:Metabolic pathways,hsa01130:Biosynthesis of antibiotics,
C9JUM8	IFI44	0.00237985	GO:0009615~response to virus,	GO:0005737~cytoplasm,
H7C1K6	IFI44L	0.00131712	GO:0051607~defense response to virus,	GO:0005654~nucleoplasm,GO:0005737~cytoplasm,	GO:0005525~GTP binding,
P09914	IFIT1	0.000408622	GO:0009615~response to virus,GO:0019060~intracellular transport of viral protein in host cell,GO:0032091~negative regulation of protein binding,GO:0045070~positive regulation of viral genome replication,GO:0045071~negative regulation of viral genome replication,GO:0050689~negative regulation of defense response to virus by host,GO:0051097~negative regulation of helicase activity,GO:0051607~defens…	GO:0005737~cytoplasm,GO:0005829~cytosol,GO:0043657~host cell,	GO:0003723~RNA binding,GO:0005515~protein binding,	hsa05160:Hepatitis C,hsa05168:Herpes simplex infection,
O14879	IFIT3	0.00473993	GO:0008285~negative regulation of cell proliferation,GO:0009615~response to virus,GO:0035457~cellular response to interferon-alpha,GO:0043066~negative regulation of apoptotic process,GO:0051607~defense response to virus,GO:0060337~type I interferon signaling pathway,	GO:0005737~cytoplasm,GO:0005739~mitochondrion,GO:0005829~cytosol,	GO:0003723~RNA binding,GO:0005515~protein binding,GO:0042802~identical protein binding,
J3QRH2	IFT20	0.326144	GO:0001736~establishment of planar polarity,GO:0001822~kidney development,GO:0007224~smoothened signaling pathway,GO:0008542~visual learning,GO:0034067~protein localization to Golgi apparatus,GO:0035845~photoreceptor cell outer segment organization,GO:0036372~opsin transport,GO:0042073~intraciliary transport,GO:0042384~cilium assembly,GO:0051642~centrosome localization,GO:0055007~cardiac muscle c…	GO:0000139~Golgi membrane,GO:0001750~photoreceptor outer segment,GO:0005801~cis-Golgi network,GO:0005813~centrosome,GO:0005814~centriole,GO:0005902~microvillus,GO:0005929~cilium,GO:0030992~intraciliary transport particle B,GO:0031514~motile cilium,GO:0032391~photoreceptor connecting cilium,GO:0032420~stereocilium,GO:0044292~dendrite terminus,GO:0070062~extracellular exosome,GO:0072372~primary cil…	GO:0002046~opsin binding,GO:0005515~protein binding,GO:0017137~Rab GTPase binding,
H0YBL1	IMPA1	0.221627	GO:0006020~inositol metabolic process,GO:0006021~inositol biosynthetic process,GO:0006661~phosphatidylinositol biosynthetic process,GO:0006796~phosphate-containing compound metabolic process,GO:0007165~signal transduction,GO:0043647~inositol phosphate metabolic process,GO:0046854~phosphatidylinositol phosphorylation,GO:0046855~inositol phosphate dephosphorylation,	GO:0005737~cytoplasm,GO:0005829~cytosol,GO:0070062~extracellular exosome,	GO:0000287~magnesium ion binding,GO:0005515~protein binding,GO:0008934~inositol monophosphate 1-phosphatase activity,GO:0030145~manganese ion binding,GO:0031403~lithium ion binding,GO:0042802~identical protein binding,GO:0042803~protein homodimerization activity,GO:0052832~inositol monophosphate 3-phosphatase activity,GO:0052833~inositol monophosphate 4-phosphatase activity,GO:0052834~inositol mo…	hsa00562:Inositol phosphate metabolism,hsa01100:Metabolic pathways,hsa04070:Phosphatidylinositol signaling system,
Q9P2X3	IMPACT	0.00675517	GO:0000122~negative regulation of transcription from RNA polymerase II promoter,GO:0001933~negative regulation of protein phosphorylation,GO:0031333~negative regulation of protein complex assembly,GO:0031953~negative regulation of protein autophosphorylation,GO:0034198~cellular response to amino acid starvation,GO:0042149~cellular response to glucose starvation,GO:0045666~positive regulation of n…	GO:0005737~cytoplasm,GO:0005844~polysome,	GO:0003779~actin binding,GO:0043022~ribosome binding,
C9J128	INPP1	2.93182e-05	GO:0006796~phosphate-containing compound metabolic process,GO:0007165~signal transduction,GO:0043647~inositol phosphate metabolic process,GO:0046854~phosphatidylinositol phosphorylation,GO:0046855~inositol phosphate dephosphorylation,	GO:0005737~cytoplasm,GO:0005829~cytosol,	GO:0000287~magnesium ion binding,GO:0004441~inositol-1,4-bisphosphate 1-phosphatase activity,GO:0052829~inositol-1,3,4-trisphosphate 1-phosphatase activity,	hsa00562:Inositol phosphate metabolism,hsa01100:Metabolic pathways,hsa04070:Phosphatidylinositol signaling system,
Q13576	IQGAP2	6.87696e-06	GO:0007165~signal transduction,GO:0034260~negative regulation of GTPase activity,GO:0034314~Arp2/3 complex-mediated actin nucleation,GO:0043087~regulation of GTPase activity,GO:0070493~thrombin receptor signaling pathway,	GO:0005737~cytoplasm,GO:0005829~cytosol,GO:0005874~microtubule,GO:0005902~microvillus,GO:0009986~cell surface,GO:0015629~actin cytoskeleton,GO:0030027~lamellipodium,GO:0030175~filopodium,GO:0031941~filamentous actin,GO:0070062~extracellular exosome,	GO:0003779~actin binding,GO:0005095~GTPase inhibitor activity,GO:0005516~calmodulin binding,GO:0005547~phosphatidylinositol-3,4,5-trisphosphate binding,GO:0017048~Rho GTPase binding,GO:0048365~Rac GTPase binding,GO:0051015~actin filament binding,GO:0071933~Arp2/3 complex binding,	hsa04810:Regulation of actin cytoskeleton,
P53990	IST1	0.0665019	GO:0000910~cytokinesis,GO:0008104~protein localization,GO:0009838~abscission,GO:0015031~protein transport,GO:0019076~viral release from host cell,GO:0036258~multivesicular body assembly,GO:0045184~establishment of protein localization,GO:0045862~positive regulation of proteolysis,GO:0046745~viral capsid secondary envelopment,GO:0048672~positive regulation of collateral sprouting,GO:0051301~cell d…	GO:0005635~nuclear envelope,GO:0005793~endoplasmic reticulum-Golgi intermediate compartment,GO:0005813~centrosome,GO:0005829~cytosol,GO:0005913~cell-cell adherens junction,GO:0016023~cytoplasmic, membrane-bounded vesicle,GO:0030496~midbody,GO:0031410~cytoplasmic vesicle,GO:0070062~extracellular exosome,GO:0090543~Flemming body,	GO:0005515~protein binding,GO:0019904~protein domain specific binding,GO:0032403~protein complex binding,GO:0090541~MIT domain binding,GO:0098641~cadherin binding involved in cell-cell adhesion,	hsa04144:Endocytosis,
J3KRH4	ISYNA1	0.618573	GO:0006021~inositol biosynthetic process,GO:0008654~phospholipid biosynthetic process,GO:0043647~inositol phosphate metabolic process,	GO:0005737~cytoplasm,GO:0005829~cytosol,	GO:0004512~inositol-3-phosphate synthase activity,GO:0005515~protein binding,	hsa00562:Inositol phosphate metabolism,hsa01100:Metabolic pathways,hsa01130:Biosynthesis of antibiotics,
Q9BY32	ITPA	6.58246e-06	GO:0006193~ITP catabolic process,GO:0009117~nucleotide metabolic process,GO:0009143~nucleoside triphosphate catabolic process,GO:0009204~deoxyribonucleoside triphosphate catabolic process,GO:0051276~chromosome organization,GO:0055086~nucleobase-containing small molecule metabolic process,	GO:0005737~cytoplasm,GO:0005829~cytosol,	GO:0000166~nucleotide binding,GO:0016787~hydrolase activity,GO:0035529~NADH pyrophosphatase activity,GO:0035870~dITP diphosphatase activity,GO:0036220~ITP diphosphatase activity,GO:0036222~XTP diphosphatase activity,GO:0046872~metal ion binding,GO:0047429~nucleoside-triphosphate diphosphatase activity,	hsa00230:Purine metabolism,hsa00983:Drug metabolism - other enzymes,hsa01100:Metabolic pathways,
A0A0A0MT83	IVD	0.417885	GO:0006552~leucine catabolic process,GO:0009083~branched-chain amino acid catabolic process,GO:0033539~fatty acid beta-oxidation using acyl-CoA dehydrogenase,GO:0055088~lipid homeostasis,	GO:0005654~nucleoplasm,GO:0005739~mitochondrion,GO:0005759~mitochondrial matrix,GO:0031966~mitochondrial membrane,	GO:0000062~fatty-acyl-CoA binding,GO:0003995~acyl-CoA dehydrogenase activity,GO:0008470~isovaleryl-CoA dehydrogenase activity,GO:0009055~electron carrier activity,GO:0016627~oxidoreductase activity, acting on the CH-CH group of donors,GO:0050660~flavin adenine dinucleotide binding,GO:0052890~oxidoreductase activity, acting on the CH-CH group of donors, with a flavin as acceptor,	hsa00280:Valine, leucine and isoleucine degradation,hsa01100:Metabolic pathways,
Q63ZY3	KANK2	9.08002e-06	GO:0000122~negative regulation of transcription from RNA polymerase II promoter,GO:0006351~transcription, DNA-templated,GO:0006915~apoptotic process,GO:0008285~negative regulation of cell proliferation,GO:0033147~negative regulation of intracellular estrogen receptor signaling pathway,GO:0043069~negative regulation of programmed cell death,GO:0070563~negative regulation of vitamin D receptor sign…	GO:0005737~cytoplasm,GO:0005739~mitochondrion,	GO:0005515~protein binding,
Q5T5P2	KIAA1217	1.63683e-05	GO:0048706~embryonic skeletal system development,	GO:0005737~cytoplasm,
F8WEP1	KYNU	1.43555e-05	GO:0006569~tryptophan catabolic process,GO:0009435~NAD biosynthetic process,GO:0019441~tryptophan catabolic process to kynurenine,GO:0019442~tryptophan catabolic process to acetyl-CoA,GO:0019805~quinolinate biosynthetic process,GO:0034341~response to interferon-gamma,GO:0034354~'de novo' NAD biosynthetic process from tryptophan,GO:0034516~response to vitamin B6,GO:0043420~anthranilate metabolic p…	GO:0005654~nucleoplasm,GO:0005737~cytoplasm,GO:0005739~mitochondrion,GO:0005829~cytosol,	GO:0030170~pyridoxal phosphate binding,GO:0030429~kynureninase activity,GO:0042803~protein homodimerization activity,	hsa00380:Tryptophan metabolism,hsa01100:Metabolic pathways,
Q9Y2Q5	LAMTOR2	0.0310234	GO:0000165~MAPK cascade,GO:0000186~activation of MAPKK activity,GO:0007050~cell cycle arrest,GO:0016049~cell growth,GO:0016236~macroautophagy,GO:0032008~positive regulation of TOR signaling,GO:0034613~cellular protein localization,GO:0043547~positive regulation of GTPase activity,GO:0071230~cellular response to amino acid stimulus,	GO:0005765~lysosomal membrane,GO:0005770~late endosome,GO:0010008~endosome membrane,GO:0070062~extracellular exosome,GO:0071986~Ragulator complex,	GO:0005085~guanyl-nucleotide exchange factor activity,GO:0005515~protein binding,GO:0032947~protein complex scaffold,
O43504	LAMTOR5	0.0504643	GO:0007050~cell cycle arrest,GO:0008361~regulation of cell size,GO:0009615~response to virus,GO:0016236~macroautophagy,GO:0019079~viral genome replication,GO:0032008~positive regulation of TOR signaling,GO:0043066~negative regulation of apoptotic process,GO:0043154~negative regulation of cysteine-type endopeptidase activity involved in apoptotic process,GO:0043547~positive regulation of GTPase ac…	GO:0005764~lysosome,GO:0005765~lysosomal membrane,GO:0005829~cytosol,GO:0071986~Ragulator complex,	GO:0005085~guanyl-nucleotide exchange factor activity,GO:0005515~protein binding,GO:0032947~protein complex scaffold,	hsa05161:Hepatitis B,
O00182	LGALS9	0.000616786	GO:0002519~natural killer cell tolerance induction,GO:0006935~chemotaxis,GO:0006954~inflammatory response,GO:0007565~female pregnancy,GO:0010628~positive regulation of gene expression,GO:0010629~negative regulation of gene expression,GO:0032496~response to lipopolysaccharide,GO:0032673~regulation of interleukin-4 production,GO:0032674~regulation of interleukin-5 production,GO:0032682~negative reg…	GO:0005615~extracellular space,GO:0005622~intracellular,GO:0005634~nucleus,GO:0005737~cytoplasm,GO:0070062~extracellular exosome,	GO:0004871~signal transducer activity,GO:0005534~galactose binding,GO:0019899~enzyme binding,GO:0030246~carbohydrate binding,GO:0048030~disaccharide binding,
Q9BS40	LXN	0.00753679	GO:0006954~inflammatory response,GO:0010951~negative regulation of endopeptidase activity,GO:0050965~detection of temperature stimulus involved in sensory perception of pain,	GO:0005737~cytoplasm,GO:0070062~extracellular exosome,	GO:0005515~protein binding,GO:0008191~metalloendopeptidase inhibitor activity,GO:0008201~heparin binding,
A0A087X1K9	LYPLA1	0.000353687	GO:0002084~protein depalmitoylation,GO:0006631~fatty acid metabolic process,GO:0042997~negative regulation of Golgi to plasma membrane protein transport,GO:0050999~regulation of nitric-oxide synthase activity,	GO:0005737~cytoplasm,GO:0005739~mitochondrion,GO:0005829~cytosol,GO:0016021~integral component of membrane,GO:0070062~extracellular exosome,	GO:0004622~lysophospholipase activity,GO:0008474~palmitoyl-(protein) hydrolase activity,GO:0016298~lipase activity,GO:0016787~hydrolase activity,	hsa00564:Glycerophospholipid metabolism,hsa05231:Choline metabolism in cancer,
O95372	LYPLA2	0.00502524	GO:0002084~protein depalmitoylation,GO:0006631~fatty acid metabolic process,GO:0098609~cell-cell adhesion,	GO:0005737~cytoplasm,GO:0005913~cell-cell adherens junction,GO:0070062~extracellular exosome,	GO:0008474~palmitoyl-(protein) hydrolase activity,GO:0016787~hydrolase activity,GO:0052689~carboxylic ester hydrolase activity,GO:0098641~cadherin binding involved in cell-cell adhesion,	hsa00564:Glycerophospholipid metabolism,
Q9NQ48	LZTFL1	0.0133796	GO:1903565~negative regulation of protein localization to cilium,GO:1903568~negative regulation of protein localization to ciliary membrane,	GO:0005829~cytosol,GO:0016021~integral component of membrane,	GO:0005515~protein binding,GO:0032403~protein complex binding,GO:0042802~identical protein binding,
H3BTL1	MAP1LC3B	0.25691	GO:0000045~autophagosome assembly,GO:0006914~autophagy,GO:0006995~cellular response to nitrogen starvation,GO:0016236~macroautophagy,GO:1903146~regulation of mitophagy,	GO:0000421~autophagosome membrane,GO:0005622~intracellular,GO:0005739~mitochondrion,GO:0005776~autophagosome,GO:0005829~cytosol,GO:0005874~microtubule,GO:0005930~axoneme,GO:0012505~endomembrane system,GO:0031090~organelle membrane,GO:0031410~cytoplasmic vesicle,	GO:0005515~protein binding,GO:0008017~microtubule binding,GO:0031625~ubiquitin protein ligase binding,
E9PG35	MCCC1	0.00133564	GO:0006552~leucine catabolic process,GO:0006768~biotin metabolic process,GO:0009083~branched-chain amino acid catabolic process,GO:0051291~protein heterooligomerization,	GO:0002169~3-methylcrotonyl-CoA carboxylase complex, mitochondrial,GO:0005739~mitochondrion,GO:0005743~mitochondrial inner membrane,GO:0005759~mitochondrial matrix,GO:0005829~cytosol,GO:1905202~methylcrotonoyl-CoA carboxylase complex,	GO:0004075~biotin carboxylase activity,GO:0004485~methylcrotonoyl-CoA carboxylase activity,GO:0005515~protein binding,GO:0005524~ATP binding,GO:0009374~biotin binding,GO:0046872~metal ion binding,	hsa00280:Valine, leucine and isoleucine degradation,hsa01100:Metabolic pathways,
Q9HCC0	MCCC2	1.9136e-05	GO:0006552~leucine catabolic process,GO:0006768~biotin metabolic process,GO:0009083~branched-chain amino acid catabolic process,GO:0015936~coenzyme A metabolic process,GO:0051291~protein heterooligomerization,	GO:0002169~3-methylcrotonyl-CoA carboxylase complex, mitochondrial,GO:0005739~mitochondrion,GO:0005759~mitochondrial matrix,GO:0005829~cytosol,GO:1905202~methylcrotonoyl-CoA carboxylase complex,	GO:0004485~methylcrotonoyl-CoA carboxylase activity,GO:0005515~protein binding,GO:0005524~ATP binding,GO:0016874~ligase activity,	hsa00280:Valine, leucine and isoleucine degradation,hsa01100:Metabolic pathways,
Q8NE86	MCU	0.0677595	GO:0006851~mitochondrial calcium ion transport,GO:0019722~calcium-mediated signaling,GO:0032024~positive regulation of insulin secretion,GO:0035786~protein complex oligomerization,GO:0036444~calcium ion transmembrane import into mitochondrion,GO:0042593~glucose homeostasis,GO:0051561~positive regulation of mitochondrial calcium ion concentration,	GO:0005739~mitochondrion,GO:0005743~mitochondrial inner membrane,GO:0016021~integral component of membrane,GO:0031305~integral component of mitochondrial inner membrane,GO:0034704~calcium channel complex,GO:1990246~uniplex complex,	GO:0005262~calcium channel activity,GO:0005515~protein binding,GO:0015292~uniporter activity,GO:0042802~identical protein binding,
P48163	ME1	0.00131328	GO:0005975~carbohydrate metabolic process,GO:0006090~pyruvate metabolic process,GO:0006108~malate metabolic process,GO:0006741~NADP biosynthetic process,GO:0007156~homophilic cell adhesion via plasma membrane adhesion molecules,GO:0009725~response to hormone,GO:0009743~response to carbohydrate,GO:0051262~protein tetramerization,GO:0055114~oxidation-reduction process,GO:1902031~regulation of NADP …	GO:0005739~mitochondrion,GO:0005829~cytosol,GO:0005886~plasma membrane,	GO:0004470~malic enzyme activity,GO:0004471~malate dehydrogenase (decarboxylating) (NAD+) activity,GO:0004473~malate dehydrogenase (decarboxylating) (NADP+) activity,GO:0005509~calcium ion binding,GO:0008948~oxaloacetate decarboxylase activity,GO:0009055~electron carrier activity,GO:0030145~manganese ion binding,GO:0043531~ADP binding,GO:0050661~NADP binding,GO:0051287~NAD binding,	hsa00620:Pyruvate metabolism,hsa01100:Metabolic pathways,hsa01200:Carbon metabolism,
E9PGW7	MED22	0.318111	GO:0006351~transcription, DNA-templated,GO:0006357~regulation of transcription from RNA polymerase II promoter,	GO:0005737~cytoplasm,GO:0016592~mediator complex,	GO:0001104~RNA polymerase II transcription cofactor activity,GO:0005515~protein binding,
H0YAI3	METAP1	0.00300208	GO:0006417~regulation of translation,GO:0006508~proteolysis,GO:0018206~peptidyl-methionine modification,GO:0022400~regulation of rhodopsin mediated signaling pathway,GO:0031365~N-terminal protein amino acid modification,GO:0070084~protein initiator methionine removal,GO:0070527~platelet aggregation,	GO:0005634~nucleus,GO:0005737~cytoplasm,GO:0005829~cytosol,GO:0022626~cytosolic ribosome,	GO:0004177~aminopeptidase activity,GO:0008235~metalloexopeptidase activity,GO:0046872~metal ion binding,GO:0070006~metalloaminopeptidase activity,
Q9BRT3	MIEN1	5.09402e-05	GO:0006915~apoptotic process,GO:0030335~positive regulation of cell migration,GO:0043066~negative regulation of apoptotic process,GO:0051491~positive regulation of filopodium assembly,	GO:0005654~nucleoplasm,GO:0005737~cytoplasm,GO:0005829~cytosol,GO:0031235~intrinsic component of the cytoplasmic side of the plasma membrane,GO:0070062~extracellular exosome,	GO:0005515~protein binding,
Q7Z3U7	MON2	0.0189009	GO:0006895~Golgi to endosome transport,GO:0015031~protein transport,GO:0015986~ATP synthesis coupled proton transport,	GO:0000276~mitochondrial proton-transporting ATP synthase complex, coupling factor F(o),GO:0005829~cytosol,GO:0016021~integral component of membrane,GO:0070062~extracellular exosome,	GO:0005515~protein binding,GO:0015078~hydrogen ion transmembrane transporter activity,
J3KSW8	MPRIP	0.224485	GO:0098609~cell-cell adhesion,	GO:0005737~cytoplasm,GO:0005913~cell-cell adherens junction,GO:0005925~focal adhesion,GO:0015629~actin cytoskeleton,	GO:0003779~actin binding,GO:0005515~protein binding,GO:0098641~cadherin binding involved in cell-cell adhesion,
E9PKV2	MRPL17	0.0052474	GO:0000002~mitochondrial genome maintenance,GO:0006412~translation,GO:0070125~mitochondrial translational elongation,GO:0070126~mitochondrial translational termination,	GO:0005743~mitochondrial inner membrane,GO:0005762~mitochondrial large ribosomal subunit,GO:0005840~ribosome,	GO:0003735~structural constituent of ribosome,GO:0019904~protein domain specific binding,	hsa03010:Ribosome,
Q9NWU5	MRPL22	0.003472	GO:0006412~translation,GO:0070125~mitochondrial translational elongation,GO:0070126~mitochondrial translational termination,	GO:0005739~mitochondrion,GO:0005743~mitochondrial inner membrane,GO:0005762~mitochondrial large ribosomal subunit,GO:0015934~large ribosomal subunit,	GO:0003735~structural constituent of ribosome,GO:0044822~poly(A) RNA binding,	hsa03010:Ribosome,
Q96A35	MRPL24	0.000737235	GO:0006412~translation,GO:0070125~mitochondrial translational elongation,GO:0070126~mitochondrial translational termination,	GO:0005739~mitochondrion,GO:0005743~mitochondrial inner membrane,GO:0005762~mitochondrial large ribosomal subunit,GO:0005840~ribosome,	GO:0003735~structural constituent of ribosome,	hsa03010:Ribosome,
D6RE11	MRPL27	0.173152	GO:0006412~translation,GO:0070125~mitochondrial translational elongation,GO:0070126~mitochondrial translational termination,	GO:0005743~mitochondrial inner membrane,GO:0005762~mitochondrial large ribosomal subunit,GO:0005840~ribosome,	GO:0003735~structural constituent of ribosome,GO:0005515~protein binding,GO:0044822~poly(A) RNA binding,	hsa03010:Ribosome,
D6RC14	MRPL3	0.0318947	GO:0006412~translation,GO:0070125~mitochondrial translational elongation,GO:0070126~mitochondrial translational termination,	GO:0005743~mitochondrial inner membrane,GO:0005762~mitochondrial large ribosomal subunit,GO:0005840~ribosome,	GO:0003723~RNA binding,GO:0003735~structural constituent of ribosome,GO:0044822~poly(A) RNA binding,	hsa03010:Ribosome,
Q9H9J2	MRPL44	0.0110645	GO:0006396~RNA processing,GO:0030422~production of siRNA involved in RNA interference,GO:0031053~primary miRNA processing,GO:0031054~pre-miRNA processing,GO:0070125~mitochondrial translational elongation,GO:0070126~mitochondrial translational termination,GO:0090502~RNA phosphodiester bond hydrolysis, endonucleolytic,	GO:0005634~nucleus,GO:0005743~mitochondrial inner membrane,GO:0005840~ribosome,	GO:0003725~double-stranded RNA binding,GO:0004525~ribonuclease III activity,GO:0005515~protein binding,GO:0044822~poly(A) RNA binding,
Q13405	MRPL49	0.0578587	GO:0006412~translation,GO:0070125~mitochondrial translational elongation,GO:0070126~mitochondrial translational termination,	GO:0005739~mitochondrion,GO:0005743~mitochondrial inner membrane,GO:0005761~mitochondrial ribosome,GO:0005762~mitochondrial large ribosomal subunit,GO:0005840~ribosome,	GO:0003735~structural constituent of ribosome,GO:0005515~protein binding,
G5E9W7	MRPS22	0.0112207	GO:0070125~mitochondrial translational elongation,GO:0070126~mitochondrial translational termination,	GO:0005739~mitochondrion,GO:0005743~mitochondrial inner membrane,GO:0005761~mitochondrial ribosome,GO:0005763~mitochondrial small ribosomal subunit,GO:0005840~ribosome,	GO:0003735~structural constituent of ribosome,
E7EPW2	MRPS25	0.554119	GO:0070125~mitochondrial translational elongation,GO:0070126~mitochondrial translational termination,	GO:0005739~mitochondrion,GO:0005743~mitochondrial inner membrane,GO:0005840~ribosome,	GO:0003735~structural constituent of ribosome,
D6RH20	MRPS27	0.0107239	GO:0070125~mitochondrial translational elongation,GO:0070126~mitochondrial translational termination,	GO:0005739~mitochondrion,GO:0005743~mitochondrial inner membrane,GO:0005840~ribosome,	GO:0005515~protein binding,
P82673	MRPS35	0.0997878	GO:0042769~DNA damage response, detection of DNA damage,GO:0070125~mitochondrial translational elongation,GO:0070126~mitochondrial translational termination,	GO:0005737~cytoplasm,GO:0005739~mitochondrion,GO:0005743~mitochondrial inner membrane,GO:0005763~mitochondrial small ribosomal subunit,	GO:0003735~structural constituent of ribosome,GO:0044822~poly(A) RNA binding,
B4DHE8	MSI2	0.280067	GO:0048864~stem cell development,	GO:0005737~cytoplasm,GO:0005844~polysome,	GO:0000166~nucleotide binding,GO:0003676~nucleic acid binding,GO:0005515~protein binding,GO:0008266~poly(U) RNA binding,GO:0044822~poly(A) RNA binding,	hsa03015:mRNA surveillance pathway,
P05976	MYL1	0.00131882	GO:0006936~muscle contraction,GO:0030049~muscle filament sliding,GO:0060048~cardiac muscle contraction,	GO:0005829~cytosol,GO:0005859~muscle myosin complex,GO:0030016~myofibril,GO:0030017~sarcomere,	GO:0005509~calcium ion binding,GO:0008307~structural constituent of muscle,
P19105	MYL12A	0.00537216	GO:0006936~muscle contraction,GO:0008360~regulation of cell shape,GO:0048013~ephrin receptor signaling pathway,GO:0070527~platelet aggregation,GO:0072661~protein targeting to plasma membrane,	GO:0001725~stress fiber,GO:0005829~cytosol,GO:0005903~brush border,GO:0016459~myosin complex,GO:0016460~myosin II complex,GO:0030018~Z disc,GO:0045177~apical part of cell,GO:0070062~extracellular exosome,	GO:0005509~calcium ion binding,GO:0005515~protein binding,	hsa04510:Focal adhesion,hsa04530:Tight junction,hsa04611:Platelet activation,hsa04670:Leukocyte transendothelial migration,hsa04810:Regulation of actin cytoskeleton,
P14649	MYL6B	0.0262906	GO:0006936~muscle contraction,GO:0007519~skeletal muscle tissue development,GO:0030049~muscle filament sliding,	GO:0005829~cytosol,GO:0005859~muscle myosin complex,GO:0016459~myosin complex,GO:0016461~unconventional myosin complex,GO:0070062~extracellular exosome,	GO:0003774~motor activity,GO:0005509~calcium ion binding,GO:0005515~protein binding,GO:0008307~structural constituent of muscle,	hsa04270:Vascular smooth muscle contraction,hsa04921:Oxytocin signaling pathway,
P24844	MYL9	3.28893e-05	GO:0006936~muscle contraction,GO:0006937~regulation of muscle contraction,GO:0070527~platelet aggregation,	GO:0001725~stress fiber,GO:0005829~cytosol,GO:0005859~muscle myosin complex,GO:0030018~Z disc,	GO:0005509~calcium ion binding,GO:0008307~structural constituent of muscle,GO:0032036~myosin heavy chain binding,	hsa04022:cGMP-PKG signaling pathway,hsa04024:cAMP signaling pathway,hsa04270:Vascular smooth muscle contraction,hsa04510:Focal adhesion,hsa04530:Tight junction,hsa04670:Leukocyte transendothelial migration,hsa04810:Regulation of actin cytoskeleton,hsa04921:Oxytocin signaling pathway,
O00160	MYO1F	0.00354073		GO:0016459~myosin complex,GO:0016461~unconventional myosin complex,	GO:0000146~microfilament motor activity,GO:0003774~motor activity,GO:0003779~actin binding,GO:0005516~calmodulin binding,GO:0005524~ATP binding,
Q9ULV0	MYO5B	0.0325887	GO:0003091~renal water homeostasis,GO:0015031~protein transport,GO:0016192~vesicle-mediated transport,GO:0032439~endosome localization,	GO:0016459~myosin complex,GO:0030659~cytoplasmic vesicle membrane,GO:0043234~protein complex,GO:0045179~apical cortex,GO:0055037~recycling endosome,GO:0070062~extracellular exosome,	GO:0000146~microfilament motor activity,GO:0003774~motor activity,GO:0003779~actin binding,GO:0005515~protein binding,GO:0005516~calmodulin binding,GO:0005524~ATP binding,GO:0017137~Rab GTPase binding,
Q9NR45	NANS	0.124602	GO:0009103~lipopolysaccharide biosynthetic process,GO:0016051~carbohydrate biosynthetic process,	GO:0005737~cytoplasm,GO:0005829~cytosol,GO:0070062~extracellular exosome,	GO:0003824~catalytic activity,GO:0008781~N-acylneuraminate cytidylyltransferase activity,GO:0047444~N-acylneuraminate-9-phosphate synthase activity,GO:0050462~N-acetylneuraminate synthase activity,	hsa00520:Amino sugar and nucleotide sugar metabolism,hsa01100:Metabolic pathways,
Q99747	NAPG	0.766719	GO:0006461~protein complex assembly,GO:0006886~intracellular protein transport,GO:0006891~intra-Golgi vesicle-mediated transport,GO:0050821~protein stabilization,GO:0061025~membrane fusion,	GO:0005622~intracellular,GO:0005739~mitochondrion,GO:0005765~lysosomal membrane,GO:0031201~SNARE complex,GO:0043209~myelin sheath,GO:0070062~extracellular exosome,	GO:0005483~soluble NSF attachment protein activity,GO:0005515~protein binding,GO:0019905~syntaxin binding,
Q6XQN6	NAPRT	0.765019	GO:0006769~nicotinamide metabolic process,GO:0006979~response to oxidative stress,GO:0009435~NAD biosynthetic process,GO:0019358~nicotinate nucleotide salvage,	GO:0005634~nucleus,GO:0005737~cytoplasm,GO:0005794~Golgi apparatus,GO:0005829~cytosol,GO:0070062~extracellular exosome,	GO:0004514~nicotinate-nucleotide diphosphorylase (carboxylating) activity,GO:0004516~nicotinate phosphoribosyltransferase activity,GO:0005515~protein binding,GO:0016874~ligase activity,	hsa00760:Nicotinate and nicotinamide metabolism,hsa01100:Metabolic pathways,
P18440	NAT1	0.14257	GO:0006805~xenobiotic metabolic process,GO:0008152~metabolic process,	GO:0005829~cytosol,	GO:0004060~arylamine N-acetyltransferase activity,GO:0016407~acetyltransferase activity,	hsa00232:Caffeine metabolism,hsa00983:Drug metabolism - other enzymes,hsa01100:Metabolic pathways,hsa05204:Chemical carcinogenesis,
P61601	NCALD	0.00329932	GO:0003073~regulation of systemic arterial blood pressure,GO:0016192~vesicle-mediated transport,GO:0019722~calcium-mediated signaling,GO:0034220~ion transmembrane transport,	GO:0005622~intracellular,GO:0005829~cytosol,GO:0030130~clathrin coat of trans-Golgi network vesicle,GO:0070062~extracellular exosome,	GO:0003779~actin binding,GO:0005509~calcium ion binding,GO:0005515~protein binding,GO:0015276~ligand-gated ion channel activity,GO:0015631~tubulin binding,GO:0030276~clathrin binding,GO:0043014~alpha-tubulin binding,
A0A087WXC5	NDUFA10	0.00979962	GO:0006120~mitochondrial electron transport, NADH to ubiquinone,GO:0032981~mitochondrial respiratory chain complex I assembly,GO:0042493~response to drug,GO:0055114~oxidation-reduction process,	GO:0005743~mitochondrial inner membrane,GO:0005747~mitochondrial respiratory chain complex I,GO:0005759~mitochondrial matrix,GO:0043209~myelin sheath,GO:0070469~respiratory chain,	GO:0008137~NADH dehydrogenase (ubiquinone) activity,	hsa00190:Oxidative phosphorylation,hsa01100:Metabolic pathways,hsa04932:Non-alcoholic fatty liver disease (NAFLD),hsa05010:Alzheimer's disease,hsa05012:Parkinson's disease,hsa05016:Huntington's disease,
O43678	NDUFA2	0.224487	GO:0006120~mitochondrial electron transport, NADH to ubiquinone,GO:0032981~mitochondrial respiratory chain complex I assembly,	GO:0005743~mitochondrial inner membrane,GO:0005747~mitochondrial respiratory chain complex I,GO:0031966~mitochondrial membrane,	GO:0008137~NADH dehydrogenase (ubiquinone) activity,	hsa00190:Oxidative phosphorylation,hsa01100:Metabolic pathways,hsa04932:Non-alcoholic fatty liver disease (NAFLD),hsa05010:Alzheimer's disease,hsa05012:Parkinson's disease,hsa05016:Huntington's disease,
O00483	NDUFA4	0.00282075	GO:0006120~mitochondrial electron transport, NADH to ubiquinone,GO:0006123~mitochondrial electron transport, cytochrome c to oxygen,GO:1902600~hydrogen ion transmembrane transport,	GO:0005739~mitochondrion,GO:0005743~mitochondrial inner membrane,GO:0005747~mitochondrial respiratory chain complex I,GO:0005751~mitochondrial respiratory chain complex IV,GO:0016021~integral component of membrane,GO:0070062~extracellular exosome,	GO:0004129~cytochrome-c oxidase activity,GO:0005515~protein binding,GO:0008137~NADH dehydrogenase (ubiquinone) activity,GO:0032403~protein complex binding,	hsa00190:Oxidative phosphorylation,hsa01100:Metabolic pathways,hsa04932:Non-alcoholic fatty liver disease (NAFLD),hsa05010:Alzheimer's disease,hsa05012:Parkinson's disease,hsa05016:Huntington's disease,
A0A087WXR5	NDUFA5	0.609664	GO:0006120~mitochondrial electron transport, NADH to ubiquinone,GO:0022904~respiratory electron transport chain,GO:0032981~mitochondrial respiratory chain complex I assembly,	GO:0005743~mitochondrial inner membrane,GO:0005747~mitochondrial respiratory chain complex I,	GO:0008137~NADH dehydrogenase (ubiquinone) activity,GO:0016651~oxidoreductase activity, acting on NAD(P)H,	hsa00190:Oxidative phosphorylation,hsa01100:Metabolic pathways,hsa04932:Non-alcoholic fatty liver disease (NAFLD),hsa05010:Alzheimer's disease,hsa05012:Parkinson's disease,hsa05016:Huntington's disease,
P51970	NDUFA8	0.148462	GO:0006120~mitochondrial electron transport, NADH to ubiquinone,GO:0032981~mitochondrial respiratory chain complex I assembly,GO:0055114~oxidation-reduction process,	GO:0005739~mitochondrion,GO:0005743~mitochondrial inner membrane,GO:0005747~mitochondrial respiratory chain complex I,GO:0005758~mitochondrial intermembrane space,GO:0070469~respiratory chain,	GO:0008137~NADH dehydrogenase (ubiquinone) activity,GO:0032403~protein complex binding,	hsa00190:Oxidative phosphorylation,hsa01100:Metabolic pathways,hsa04932:Non-alcoholic fatty liver disease (NAFLD),hsa05010:Alzheimer's disease,hsa05012:Parkinson's disease,hsa05016:Huntington's disease,
O14561	NDUFAB1	0.000343366	GO:0006120~mitochondrial electron transport, NADH to ubiquinone,GO:0006633~fatty acid biosynthetic process,GO:0009249~protein lipoylation,GO:0032981~mitochondrial respiratory chain complex I assembly,GO:0046487~glyoxylate metabolic process,	GO:0005743~mitochondrial inner membrane,GO:0005747~mitochondrial respiratory chain complex I,GO:0005759~mitochondrial matrix,GO:0031966~mitochondrial membrane,	GO:0000036~ACP phosphopantetheine attachment site binding involved in fatty acid biosynthetic process,GO:0005504~fatty acid binding,GO:0005509~calcium ion binding,GO:0005515~protein binding,GO:0008137~NADH dehydrogenase (ubiquinone) activity,	hsa00190:Oxidative phosphorylation,hsa01100:Metabolic pathways,hsa04932:Non-alcoholic fatty liver disease (NAFLD),hsa05010:Alzheimer's disease,hsa05012:Parkinson's disease,hsa05016:Huntington's disease,
H3BPJ9	NDUFB10	0.121048	GO:0006120~mitochondrial electron transport, NADH to ubiquinone,GO:0032981~mitochondrial respiratory chain complex I assembly,	GO:0005743~mitochondrial inner membrane,GO:0005747~mitochondrial respiratory chain complex I,GO:0070062~extracellular exosome,	GO:0005515~protein binding,GO:0008137~NADH dehydrogenase (ubiquinone) activity,	hsa00190:Oxidative phosphorylation,hsa01100:Metabolic pathways,hsa04932:Non-alcoholic fatty liver disease (NAFLD),hsa05010:Alzheimer's disease,hsa05012:Parkinson's disease,hsa05016:Huntington's disease,
P17568	NDUFB7	0.00689053	GO:0006120~mitochondrial electron transport, NADH to ubiquinone,GO:0032981~mitochondrial respiratory chain complex I assembly,	GO:0005739~mitochondrion,GO:0005743~mitochondrial inner membrane,GO:0005747~mitochondrial respiratory chain complex I,GO:0005758~mitochondrial intermembrane space,	GO:0008137~NADH dehydrogenase (ubiquinone) activity,	hsa00190:Oxidative phosphorylation,hsa01100:Metabolic pathways,hsa04932:Non-alcoholic fatty liver disease (NAFLD),hsa05010:Alzheimer's disease,hsa05012:Parkinson's disease,hsa05016:Huntington's disease,
E9PH64	NDUFB9	0.000701551	GO:0006120~mitochondrial electron transport, NADH to ubiquinone,GO:0007605~sensory perception of sound,GO:0032981~mitochondrial respiratory chain complex I assembly,	GO:0005739~mitochondrion,GO:0005743~mitochondrial inner membrane,GO:0005747~mitochondrial respiratory chain complex I,GO:0070062~extracellular exosome,	GO:0005515~protein binding,GO:0008137~NADH dehydrogenase (ubiquinone) activity,	hsa00190:Oxidative phosphorylation,hsa01100:Metabolic pathways,hsa04932:Non-alcoholic fatty liver disease (NAFLD),hsa05010:Alzheimer's disease,hsa05012:Parkinson's disease,hsa05016:Huntington's disease,
H0Y9M8	NDUFS4	7.98859e-05	GO:0001932~regulation of protein phosphorylation,GO:0006120~mitochondrial electron transport, NADH to ubiquinone,GO:0007420~brain development,GO:0019933~cAMP-mediated signaling,GO:0022900~electron transport chain,GO:0032981~mitochondrial respiratory chain complex I assembly,GO:0045333~cellular respiration,GO:0048146~positive regulation of fibroblast proliferation,GO:0051591~response to cAMP,GO:00…	GO:0005739~mitochondrion,GO:0005743~mitochondrial inner membrane,GO:0005747~mitochondrial respiratory chain complex I,GO:0045271~respiratory chain complex I,	GO:0008137~NADH dehydrogenase (ubiquinone) activity,GO:0016651~oxidoreductase activity, acting on NAD(P)H,	hsa00190:Oxidative phosphorylation,hsa01100:Metabolic pathways,hsa04932:Non-alcoholic fatty liver disease (NAFLD),hsa05010:Alzheimer's disease,hsa05012:Parkinson's disease,hsa05016:Huntington's disease,
O75380	NDUFS6	0.000107728	GO:0006120~mitochondrial electron transport, NADH to ubiquinone,GO:0006631~fatty acid metabolic process,GO:0006936~muscle contraction,GO:0010259~multicellular organism aging,GO:0022904~respiratory electron transport chain,GO:0032981~mitochondrial respiratory chain complex I assembly,GO:0035264~multicellular organism growth,GO:0061458~reproductive system development,GO:0070584~mitochondrion morpho…	GO:0005743~mitochondrial inner membrane,GO:0005747~mitochondrial respiratory chain complex I,GO:0070469~respiratory chain,	GO:0008137~NADH dehydrogenase (ubiquinone) activity,GO:0009055~electron carrier activity,	hsa00190:Oxidative phosphorylation,hsa01100:Metabolic pathways,hsa04932:Non-alcoholic fatty liver disease (NAFLD),hsa05010:Alzheimer's disease,hsa05012:Parkinson's disease,hsa05016:Huntington's disease,
F5H5N1	NDUFS7	0.0651374	GO:0006120~mitochondrial electron transport, NADH to ubiquinone,GO:0032981~mitochondrial respiratory chain complex I assembly,GO:0055114~oxidation-reduction process,	GO:0005743~mitochondrial inner membrane,GO:0005747~mitochondrial respiratory chain complex I,GO:0005759~mitochondrial matrix,GO:0043005~neuron projection,GO:0043025~neuronal cell body,GO:0097060~synaptic membrane,	GO:0002020~protease binding,GO:0003954~NADH dehydrogenase activity,GO:0005515~protein binding,GO:0008137~NADH dehydrogenase (ubiquinone) activity,GO:0016655~oxidoreductase activity, acting on NAD(P)H, quinone or similar compound as acceptor,GO:0046872~metal ion binding,GO:0048038~quinone binding,GO:0051536~iron-sulfur cluster binding,GO:0051539~4 iron, 4 sulfur cluster binding,	hsa00190:Oxidative phosphorylation,hsa01100:Metabolic pathways,hsa04932:Non-alcoholic fatty liver disease (NAFLD),hsa05010:Alzheimer's disease,hsa05012:Parkinson's disease,hsa05016:Huntington's disease,
G3V0I5	NDUFV1	0.00103835	GO:0006120~mitochondrial electron transport, NADH to ubiquinone,GO:0009060~aerobic respiration,GO:0032981~mitochondrial respiratory chain complex I assembly,	GO:0005743~mitochondrial inner membrane,GO:0005747~mitochondrial respiratory chain complex I,	GO:0003954~NADH dehydrogenase activity,GO:0008137~NADH dehydrogenase (ubiquinone) activity,GO:0010181~FMN binding,GO:0046872~metal ion binding,GO:0051287~NAD binding,GO:0051539~4 iron, 4 sulfur cluster binding,	hsa00190:Oxidative phosphorylation,hsa01100:Metabolic pathways,hsa04932:Non-alcoholic fatty liver disease (NAFLD),hsa05010:Alzheimer's disease,hsa05012:Parkinson's disease,hsa05016:Huntington's disease,
P48681	NES	0.00488268	GO:0000086~G2/M transition of mitotic cell cycle,GO:0007417~central nervous system development,GO:0007420~brain development,GO:0030844~positive regulation of intermediate filament depolymerization,GO:0031076~embryonic camera-type eye development,GO:0032091~negative regulation of protein binding,GO:0043086~negative regulation of catalytic activity,GO:0043524~negative regulation of neuron apoptotic…	GO:0005737~cytoplasm,GO:0005882~intermediate filament,GO:0031012~extracellular matrix,GO:0045111~intermediate filament cytoskeleton,	GO:0005198~structural molecule activity,GO:0019215~intermediate filament binding,
Q9NQR4	NIT2	0.462407	GO:0006107~oxaloacetate metabolic process,GO:0006528~asparagine metabolic process,GO:0006541~glutamine metabolic process,GO:0006807~nitrogen compound metabolic process,	GO:0005737~cytoplasm,GO:0005739~mitochondrion,GO:0005813~centrosome,GO:0070062~extracellular exosome,	GO:0016810~hydrolase activity, acting on carbon-nitrogen (but not peptide) bonds,GO:0050152~omega-amidase activity,	hsa00250:Alanine, aspartate and glutamate metabolism,
P15559	NQO1	4.42978e-05	GO:0006521~regulation of cellular amino acid metabolic process,GO:0006805~xenobiotic metabolic process,GO:0006809~nitric oxide biosynthetic process,GO:0007271~synaptic transmission, cholinergic,GO:0007568~aging,GO:0007584~response to nutrient,GO:0009636~response to toxic substance,GO:0019430~removal of superoxide radicals,GO:0032355~response to estradiol,GO:0043066~negative regulation of apoptoti…	GO:0005737~cytoplasm,GO:0005829~cytosol,GO:0016021~integral component of membrane,GO:0043025~neuronal cell body,GO:0070062~extracellular exosome,	GO:0003955~NAD(P)H dehydrogenase (quinone) activity,GO:0004128~cytochrome-b5 reductase activity, acting on NAD(P)H,GO:0004784~superoxide dismutase activity,GO:0005515~protein binding,GO:0042802~identical protein binding,GO:0044822~poly(A) RNA binding,	hsa00130:Ubiquinone and other terpenoid-quinone biosynthesis,
X6RM59	NT5C3A	0.00408719	GO:0006213~pyrimidine nucleoside metabolic process,GO:0009117~nucleotide metabolic process,GO:0016311~dephosphorylation,GO:0046085~adenosine metabolic process,GO:0046135~pyrimidine nucleoside catabolic process,	GO:0005737~cytoplasm,GO:0005739~mitochondrion,GO:0005783~endoplasmic reticulum,GO:0005829~cytosol,	GO:0000166~nucleotide binding,GO:0000287~magnesium ion binding,GO:0008253~5'-nucleotidase activity,GO:0008665~2'-phosphotransferase activity,	hsa00230:Purine metabolism,hsa00240:Pyrimidine metabolism,hsa00760:Nicotinate and nicotinamide metabolism,hsa01100:Metabolic pathways,
Q9NV35	NUDT15	0.685139	GO:0000278~mitotic cell cycle,GO:0006195~purine nucleotide catabolic process,GO:0006203~dGTP catabolic process,GO:0034656~nucleobase-containing small molecule catabolic process,GO:0042262~DNA protection,GO:0042738~exogenous drug catabolic process,GO:0061136~regulation of proteasomal protein catabolic process,GO:1901292~nucleoside phosphate catabolic process,	GO:0005829~cytosol,	GO:0005515~protein binding,GO:0008413~8-oxo-7,8-dihydroguanosine triphosphate pyrophosphatase activity,GO:0017110~nucleoside-diphosphatase activity,GO:0035529~NADH pyrophosphatase activity,GO:0035539~8-oxo-7,8-dihydrodeoxyguanosine triphosphate pyrophosphatase activity,GO:0046872~metal ion binding,GO:0047429~nucleoside-triphosphate diphosphatase activity,
Q56VL3	OCIAD2	0.0478815		GO:0005743~mitochondrial inner membrane,GO:0005768~endosome,
A0A0D9SFS3	OGDH	0.0025965	GO:0006091~generation of precursor metabolites and energy,GO:0006096~glycolytic process,GO:0006099~tricarboxylic acid cycle,GO:0006103~2-oxoglutarate metabolic process,GO:0006104~succinyl-CoA metabolic process,GO:0006554~lysine catabolic process,GO:0006734~NADH metabolic process,GO:0021695~cerebellar cortex development,GO:0021756~striatum development,GO:0021766~hippocampus development,GO:0021794~…	GO:0005739~mitochondrion,GO:0005759~mitochondrial matrix,GO:0005829~cytosol,GO:0031966~mitochondrial membrane,GO:0045252~oxoglutarate dehydrogenase complex,	GO:0004591~oxoglutarate dehydrogenase (succinyl-transferring) activity,GO:0030976~thiamine pyrophosphate binding,GO:0031072~heat shock protein binding,GO:0034602~oxoglutarate dehydrogenase (NAD+) activity,GO:0046872~metal ion binding,GO:0051087~chaperone binding,	hsa00020:Citrate cycle (TCA cycle),hsa00310:Lysine degradation,hsa00380:Tryptophan metabolism,hsa01100:Metabolic pathways,hsa01130:Biosynthesis of antibiotics,hsa01200:Carbon metabolism,
Q92882	OSTF1	0.00870361	GO:0001503~ossification,GO:0007165~signal transduction,	GO:0005622~intracellular,GO:0005737~cytoplasm,GO:0070062~extracellular exosome,	GO:0005515~protein binding,GO:0017124~SH3 domain binding,
F5GYN4	OTUB1	0.00127522	GO:0002250~adaptive immune response,GO:0006281~DNA repair,GO:0006974~cellular response to DNA damage stimulus,GO:0016579~protein deubiquitination,GO:0071108~protein K48-linked deubiquitination,GO:0071347~cellular response to interleukin-1,GO:1901315~negative regulation of histone H2A K63-linked ubiquitination,GO:2000780~negative regulation of double-strand break repair,	GO:0005634~nucleus,GO:0005737~cytoplasm,GO:0070062~extracellular exosome,	GO:0004843~thiol-dependent ubiquitin-specific protease activity,GO:0005515~protein binding,GO:0019784~NEDD8-specific protease activity,GO:0031625~ubiquitin protein ligase binding,GO:0043130~ubiquitin binding,
O95747	OXSR1	0.000569877	GO:0006468~protein phosphorylation,GO:0006979~response to oxidative stress,GO:0018107~peptidyl-threonine phosphorylation,GO:0023014~signal transduction by protein phosphorylation,GO:0035556~intracellular signal transduction,GO:0071476~cellular hypotonic response,GO:1901017~negative regulation of potassium ion transmembrane transporter activity,GO:2000687~negative regulation of rubidium ion transm…	GO:0005622~intracellular,GO:0005737~cytoplasm,GO:0070062~extracellular exosome,	GO:0000287~magnesium ion binding,GO:0004674~protein serine/threonine kinase activity,GO:0004702~receptor signaling protein serine/threonine kinase activity,GO:0005515~protein binding,GO:0005524~ATP binding,
D6REB4	PAIP1	0.00191271	GO:0000289~nuclear-transcribed mRNA poly(A) tail shortening,GO:0006413~translational initiation,GO:0045727~positive regulation of translation,GO:0048255~mRNA stabilization,	GO:0005737~cytoplasm,GO:0005829~cytosol,	GO:0003723~RNA binding,GO:0005515~protein binding,GO:0008494~translation activator activity,	hsa03013:RNA transport,
Q9NVE7	PANK4	0.22321	GO:0015937~coenzyme A biosynthetic process,GO:0016310~phosphorylation,	GO:0005737~cytoplasm,	GO:0004594~pantothenate kinase activity,GO:0005524~ATP binding,	hsa00770:Pantothenate and CoA biosynthesis,hsa01100:Metabolic pathways,
P30039	PBLD	0.0778377	GO:0009058~biosynthetic process,GO:0010633~negative regulation of epithelial cell migration,GO:0010719~negative regulation of epithelial to mesenchymal transition,GO:0030277~maintenance of gastrointestinal epithelium,GO:0030512~negative regulation of transforming growth factor beta receptor signaling pathway,GO:0050680~negative regulation of epithelial cell proliferation,GO:0060392~negative regul…	GO:0005737~cytoplasm,GO:0070062~extracellular exosome,	GO:0003824~catalytic activity,GO:0005515~protein binding,GO:0016853~isomerase activity,GO:0042802~identical protein binding,
A0A494C016	PC	0.0988555	GO:0006090~pyruvate metabolic process,GO:0006094~gluconeogenesis,GO:0006629~lipid metabolic process,GO:0006768~biotin metabolic process,GO:0010629~negative regulation of gene expression,GO:0019074~viral RNA genome packaging,GO:0044791~positive regulation by host of viral release from host cell,GO:0044794~positive regulation by host of viral process,	GO:0005737~cytoplasm,GO:0005739~mitochondrion,GO:0005759~mitochondrial matrix,GO:0005829~cytosol,	GO:0003677~DNA binding,GO:0004075~biotin carboxylase activity,GO:0004736~pyruvate carboxylase activity,GO:0005515~protein binding,GO:0005524~ATP binding,GO:0009374~biotin binding,GO:0046872~metal ion binding,	hsa00020:Citrate cycle (TCA cycle),hsa00620:Pyruvate metabolism,hsa01100:Metabolic pathways,hsa01200:Carbon metabolism,hsa01230:Biosynthesis of amino acids,
E9PEC3	PCCB	0.00724839	GO:0006633~fatty acid biosynthetic process,GO:0006768~biotin metabolic process,GO:0019626~short-chain fatty acid catabolic process,	GO:0005739~mitochondrion,GO:0005759~mitochondrial matrix,GO:0005829~cytosol,GO:0009317~acetyl-CoA carboxylase complex,	GO:0003989~acetyl-CoA carboxylase activity,GO:0004658~propionyl-CoA carboxylase activity,GO:0005524~ATP binding,GO:0016874~ligase activity,	hsa00280:Valine, leucine and isoleucine degradation,hsa00630:Glyoxylate and dicarboxylate metabolism,hsa00640:Propanoate metabolism,hsa01100:Metabolic pathways,hsa01130:Biosynthesis of antibiotics,hsa01200:Carbon metabolism,
P22061	PCMT1	0.000128305	GO:0006479~protein methylation,GO:0030091~protein repair,GO:0098609~cell-cell adhesion,	GO:0005737~cytoplasm,GO:0005829~cytosol,GO:0005913~cell-cell adherens junction,GO:0016021~integral component of membrane,GO:0070062~extracellular exosome,GO:1903561~extracellular vesicle,	GO:0004719~protein-L-isoaspartate (D-aspartate) O-methyltransferase activity,GO:0005515~protein binding,GO:0098641~cadherin binding involved in cell-cell adhesion,
P49585	PCYT1A	0.0269505	GO:0006656~phosphatidylcholine biosynthetic process,GO:0006657~CDP-choline pathway,GO:0008654~phospholipid biosynthetic process,GO:0009058~biosynthetic process,	GO:0005635~nuclear envelope,GO:0005789~endoplasmic reticulum membrane,GO:0005829~cytosol,GO:0005886~plasma membrane,GO:0042587~glycogen granule,	GO:0003824~catalytic activity,GO:0004105~choline-phosphate cytidylyltransferase activity,GO:0005516~calmodulin binding,GO:0008289~lipid binding,GO:0016779~nucleotidyltransferase activity,GO:0031210~phosphatidylcholine binding,GO:0042803~protein homodimerization activity,	hsa00564:Glycerophospholipid metabolism,hsa01100:Metabolic pathways,hsa05231:Choline metabolism in cancer,
C9JST4	PDCL3	0.0343176	GO:0001525~angiogenesis,GO:0001938~positive regulation of endothelial cell proliferation,GO:0006457~protein folding,GO:0006915~apoptotic process,GO:0008616~queuosine biosynthetic process,GO:0016032~viral process,GO:0045766~positive regulation of angiogenesis,GO:0050730~regulation of peptidyl-tyrosine phosphorylation,GO:2000059~negative regulation of protein ubiquitination involved in ubiquitin-de…	GO:0005634~nucleus,GO:0005737~cytoplasm,	GO:0005515~protein binding,GO:0008479~queuine tRNA-ribosyltransferase activity,GO:0043184~vascular endothelial growth factor receptor 2 binding,GO:0044183~protein binding involved in protein folding,
Q14554	PDIA5	0.013757	GO:0006457~protein folding,GO:0034976~response to endoplasmic reticulum stress,GO:0036498~IRE1-mediated unfolded protein response,GO:0045454~cell redox homeostasis,GO:0055114~oxidation-reduction process,	GO:0005623~cell,GO:0005788~endoplasmic reticulum lumen,GO:0005789~endoplasmic reticulum membrane,	GO:0003756~protein disulfide isomerase activity,GO:0005515~protein binding,GO:0016491~oxidoreductase activity,
O00151	PDLIM1	0.915625	GO:0001666~response to hypoxia,GO:0006355~regulation of transcription, DNA-templated,GO:0006979~response to oxidative stress,GO:0098609~cell-cell adhesion,	GO:0005667~transcription factor complex,GO:0005737~cytoplasm,GO:0005856~cytoskeleton,GO:0005913~cell-cell adherens junction,GO:0005925~focal adhesion,	GO:0003713~transcription coactivator activity,GO:0008270~zinc ion binding,GO:0098641~cadherin binding involved in cell-cell adhesion,
A0A2U3TZH4	PDLIM3	9.96032e-05	GO:0007015~actin filament organization,GO:0007507~heart development,	GO:0005737~cytoplasm,GO:0015629~actin cytoskeleton,GO:0030018~Z disc,	GO:0005515~protein binding,GO:0008092~cytoskeletal protein binding,GO:0008270~zinc ion binding,GO:0008307~structural constituent of muscle,
Q15121	PEA15	0.00172963	GO:0000077~DNA damage checkpoint,GO:0000165~MAPK cascade,GO:0000187~activation of MAPK activity,GO:0006810~transport,GO:0006915~apoptotic process,GO:0008643~carbohydrate transport,GO:0042981~regulation of apoptotic process,GO:0043278~response to morphine,GO:0046325~negative regulation of glucose import,GO:1902042~negative regulation of extrinsic apoptotic signaling pathway via death domain recept…	GO:0005829~cytosol,GO:0005875~microtubule associated complex,	GO:0005515~protein binding,
C9J712	PFN2	9.63344e-05	GO:0010633~negative regulation of epithelial cell migration,GO:0030036~actin cytoskeleton organization,GO:0030833~regulation of actin filament polymerization,GO:0030837~negative regulation of actin filament polymerization,GO:0030838~positive regulation of actin filament polymerization,GO:0032233~positive regulation of actin filament bundle assembly,GO:0032781~positive regulation of ATPase activit…	GO:0005737~cytoplasm,GO:0005856~cytoskeleton,GO:0016021~integral component of membrane,GO:0043195~terminal bouton,GO:0070062~extracellular exosome,	GO:0000774~adenyl-nucleotide exchange factor activity,GO:0003785~actin monomer binding,GO:0005515~protein binding,GO:0005546~phosphatidylinositol-4,5-bisphosphate binding,	hsa04015:Rap1 signaling pathway,hsa04810:Regulation of actin cytoskeleton,hsa05131:Shigellosis,hsa05132:Salmonella infection,
O95336	PGLS	0.447881	GO:0005975~carbohydrate metabolic process,GO:0006098~pentose-phosphate shunt,	GO:0005829~cytosol,GO:0070062~extracellular exosome,	GO:0005515~protein binding,GO:0017057~6-phosphogluconolactonase activity,	hsa00030:Pentose phosphate pathway,hsa01100:Metabolic pathways,hsa01130:Biosynthesis of antibiotics,hsa01200:Carbon metabolism,
P36871	PGM1	0.00475911	GO:0005975~carbohydrate metabolic process,GO:0005978~glycogen biosynthetic process,GO:0005980~glycogen catabolic process,GO:0006006~glucose metabolic process,GO:0006094~gluconeogenesis,GO:0006096~glycolytic process,GO:0019388~galactose catabolic process,	GO:0005737~cytoplasm,GO:0005829~cytosol,GO:0015629~actin cytoskeleton,GO:0070062~extracellular exosome,	GO:0000287~magnesium ion binding,GO:0004614~phosphoglucomutase activity,GO:0005515~protein binding,GO:0016868~intramolecular transferase activity, phosphotransferases,	hsa00010:Glycolysis / Gluconeogenesis,hsa00030:Pentose phosphate pathway,hsa00052:Galactose metabolism,hsa00230:Purine metabolism,hsa00500:Starch and sucrose metabolism,hsa00520:Amino sugar and nucleotide sugar metabolism,hsa01100:Metabolic pathways,hsa01130:Biosynthesis of antibiotics,
Q96G03	PGM2	0.00477662	GO:0005975~carbohydrate metabolic process,GO:0005978~glycogen biosynthetic process,GO:0005980~glycogen catabolic process,GO:0006006~glucose metabolic process,GO:0006098~pentose-phosphate shunt,GO:0019388~galactose catabolic process,GO:0046386~deoxyribose phosphate catabolic process,	GO:0005829~cytosol,GO:0070062~extracellular exosome,	GO:0000287~magnesium ion binding,GO:0004614~phosphoglucomutase activity,GO:0005515~protein binding,GO:0008973~phosphopentomutase activity,GO:0016868~intramolecular transferase activity, phosphotransferases,	hsa00010:Glycolysis / Gluconeogenesis,hsa00030:Pentose phosphate pathway,hsa00052:Galactose metabolism,hsa00230:Purine metabolism,hsa00500:Starch and sucrose metabolism,hsa00520:Amino sugar and nucleotide sugar metabolism,hsa01100:Metabolic pathways,hsa01130:Biosynthesis of antibiotics,
Q6PCE3	PGM2L1	0.00131304	GO:0006006~glucose metabolic process,GO:0016310~phosphorylation,	GO:0005829~cytosol,	GO:0016868~intramolecular transferase activity, phosphotransferases,GO:0046872~metal ion binding,GO:0047933~glucose-1,6-bisphosphate synthase activity,	hsa00500:Starch and sucrose metabolism,
A0A494C163	PGM3	0.953393	GO:0005975~carbohydrate metabolic process,GO:0006041~glucosamine metabolic process,GO:0006048~UDP-N-acetylglucosamine biosynthetic process,GO:0006487~protein N-linked glycosylation,GO:0006493~protein O-linked glycosylation,GO:0007283~spermatogenesis,GO:0019255~glucose 1-phosphate metabolic process,GO:0030097~hemopoiesis,GO:0071704~organic substance metabolic process,	GO:0005829~cytosol,	GO:0000287~magnesium ion binding,GO:0004610~phosphoacetylglucosamine mutase activity,GO:0004614~phosphoglucomutase activity,GO:0016868~intramolecular transferase activity, phosphotransferases,GO:0046872~metal ion binding,	hsa00520:Amino sugar and nucleotide sugar metabolism,hsa01130:Biosynthesis of antibiotics,
A0A286YFA2	PHGDH	0.014807	GO:0006541~glutamine metabolic process,GO:0006544~glycine metabolic process,GO:0006564~L-serine biosynthetic process,GO:0006566~threonine metabolic process,GO:0007420~brain development,GO:0009070~serine family amino acid biosynthetic process,GO:0009448~gamma-aminobutyric acid metabolic process,GO:0010468~regulation of gene expression,GO:0019530~taurine metabolic process,GO:0021510~spinal cord dev…	GO:0005829~cytosol,GO:0043209~myelin sheath,GO:0070062~extracellular exosome,	GO:0004617~phosphoglycerate dehydrogenase activity,GO:0009055~electron carrier activity,GO:0051287~NAD binding,	hsa00260:Glycine, serine and threonine metabolism,hsa01100:Metabolic pathways,hsa01130:Biosynthesis of antibiotics,hsa01200:Carbon metabolism,hsa01230:Biosynthesis of amino acids,
Q9NRX4	PHPT1	0.00525146	GO:0006470~protein dephosphorylation,GO:0035774~positive regulation of insulin secretion involved in cellular response to glucose stimulus,GO:0035971~peptidyl-histidine dephosphorylation,GO:0050860~negative regulation of T cell receptor signaling pathway,GO:0051350~negative regulation of lyase activity,GO:2000147~positive regulation of cell motility,GO:2000249~regulation of actin cytoskeleton reo…	GO:0005829~cytosol,GO:0070062~extracellular exosome,	GO:0004721~phosphoprotein phosphatase activity,GO:0008969~phosphohistidine phosphatase activity,GO:0019855~calcium channel inhibitor activity,GO:0044325~ion channel binding,
B3KYB7	PITPNB	1.71899e-05	GO:0006629~lipid metabolic process,GO:0006810~transport,GO:0006890~retrograde vesicle-mediated transport, Golgi to ER,GO:0006997~nucleus organization,GO:0015914~phospholipid transport,	GO:0000139~Golgi membrane,GO:0005622~intracellular,GO:0005789~endoplasmic reticulum membrane,GO:0070062~extracellular exosome,	GO:0008289~lipid binding,
Q6P4A8	PLBD1	0.000984926	GO:0006644~phospholipid metabolic process,GO:0016042~lipid catabolic process,GO:0036149~phosphatidylinositol acyl-chain remodeling,GO:0036151~phosphatidylcholine acyl-chain remodeling,GO:0036152~phosphatidylethanolamine acyl-chain remodeling,	GO:0005615~extracellular space,GO:0005764~lysosome,GO:0005829~cytosol,	GO:0004622~lysophospholipase activity,GO:0004623~phospholipase A2 activity,
Q02809	PLOD1	0.021226	GO:0001666~response to hypoxia,GO:0006464~cellular protein modification process,GO:0008544~epidermis development,GO:0046947~hydroxylysine biosynthetic process,GO:0055114~oxidation-reduction process,	GO:0005783~endoplasmic reticulum,GO:0005789~endoplasmic reticulum membrane,GO:0030867~rough endoplasmic reticulum membrane,GO:0070062~extracellular exosome,	GO:0005506~iron ion binding,GO:0008475~procollagen-lysine 5-dioxygenase activity,GO:0031418~L-ascorbic acid binding,GO:0042803~protein homodimerization activity,	hsa00310:Lysine degradation,
O60568	PLOD3	0.0611188	GO:0001701~in utero embryonic development,GO:0001886~endothelial cell morphogenesis,GO:0008104~protein localization,GO:0021915~neural tube development,GO:0030199~collagen fibril organization,GO:0032870~cellular response to hormone stimulus,GO:0042311~vasodilation,GO:0048730~epidermis morphogenesis,GO:0055114~oxidation-reduction process,GO:0060425~lung morphogenesis,GO:0070831~basement membrane as…	GO:0005783~endoplasmic reticulum,GO:0005789~endoplasmic reticulum membrane,GO:0030867~rough endoplasmic reticulum membrane,GO:0070062~extracellular exosome,	GO:0005506~iron ion binding,GO:0005515~protein binding,GO:0008475~procollagen-lysine 5-dioxygenase activity,GO:0031418~L-ascorbic acid binding,GO:0033823~procollagen glucosyltransferase activity,GO:0050211~procollagen galactosyltransferase activity,	hsa00310:Lysine degradation,hsa00514:Other types of O-glycan biosynthesis,
A0A0A0MSQ0	PLS3	4.58608e-05	GO:0051017~actin filament bundle assembly,GO:0051639~actin filament network formation,GO:0051764~actin crosslink formation,GO:0060348~bone development,	GO:0005737~cytoplasm,GO:0005884~actin filament,GO:0032432~actin filament bundle,	GO:0005509~calcium ion binding,GO:0051015~actin filament binding,
H3BPH4	PMM2	0.0567559	GO:0006013~mannose metabolic process,GO:0006486~protein glycosylation,GO:0006487~protein N-linked glycosylation,GO:0009298~GDP-mannose biosynthetic process,GO:0045047~protein targeting to ER,	GO:0005737~cytoplasm,GO:0005829~cytosol,GO:0043025~neuronal cell body,GO:0070062~extracellular exosome,	GO:0004615~phosphomannomutase activity,GO:0005515~protein binding,	hsa00051:Fructose and mannose metabolism,hsa00520:Amino sugar and nucleotide sugar metabolism,hsa01100:Metabolic pathways,
O75439	PMPCB	9.53736e-05	GO:0006122~mitochondrial electron transport, ubiquinol to cytochrome c,GO:0009060~aerobic respiration,GO:0016485~protein processing,	GO:0005750~mitochondrial respiratory chain complex III,GO:0005759~mitochondrial matrix,	GO:0003824~catalytic activity,GO:0004222~metalloendopeptidase activity,GO:0008270~zinc ion binding,GO:0046872~metal ion binding,
J3QQV6	PNPO	0.408002	GO:0008615~pyridoxine biosynthetic process,GO:0042816~vitamin B6 metabolic process,GO:0042823~pyridoxal phosphate biosynthetic process,GO:0055114~oxidation-reduction process,	GO:0005654~nucleoplasm,GO:0005737~cytoplasm,GO:0005829~cytosol,GO:0070062~extracellular exosome,	GO:0004733~pyridoxamine-phosphate oxidase activity,GO:0010181~FMN binding,	hsa00750:Vitamin B6 metabolism,hsa01100:Metabolic pathways,
Q9H2U2	PPA2	0.431659	GO:0006418~tRNA aminoacylation for protein translation,GO:0006470~protein dephosphorylation,GO:0006796~phosphate-containing compound metabolic process,GO:0071344~diphosphate metabolic process,	GO:0005737~cytoplasm,GO:0005759~mitochondrial matrix,GO:0070062~extracellular exosome,	GO:0000287~magnesium ion binding,GO:0004427~inorganic diphosphatase activity,GO:0004722~protein serine/threonine phosphatase activity,	hsa00190:Oxidative phosphorylation,
H3BRQ0	PPCDC	0.331252	GO:0009108~coenzyme biosynthetic process,GO:0015937~coenzyme A biosynthetic process,	GO:0005829~cytosol,	GO:0003824~catalytic activity,GO:0004633~phosphopantothenoylcysteine decarboxylase activity,GO:0005515~protein binding,GO:0042802~identical protein binding,	hsa00770:Pantothenate and CoA biosynthesis,hsa01100:Metabolic pathways,
Q9HAB8	PPCS	0.00434428	GO:0009108~coenzyme biosynthetic process,GO:0015937~coenzyme A biosynthetic process,	GO:0005829~cytosol,GO:0070062~extracellular exosome,	GO:0004632~phosphopantothenate--cysteine ligase activity,	hsa00770:Pantothenate and CoA biosynthesis,hsa01100:Metabolic pathways,
P45877	PPIC	0.000242096	GO:0000413~protein peptidyl-prolyl isomerization,GO:0006457~protein folding,	GO:0005737~cytoplasm,GO:0070062~extracellular exosome,	GO:0003755~peptidyl-prolyl cis-trans isomerase activity,GO:0005515~protein binding,GO:0016018~cyclosporin A binding,
P49593	PPM1F	0.401457	GO:0006469~negative regulation of protein kinase activity,GO:0010628~positive regulation of gene expression,GO:0010634~positive regulation of epithelial cell migration,GO:0010811~positive regulation of cell-substrate adhesion,GO:0016576~histone dephosphorylation,GO:0033137~negative regulation of peptidyl-serine phosphorylation,GO:0035690~cellular response to drug,GO:0035970~peptidyl-threonine dep…	GO:0005829~cytosol,GO:0043234~protein complex,GO:0048471~perinuclear region of cytoplasm,	GO:0004722~protein serine/threonine phosphatase activity,GO:0005515~protein binding,GO:0016791~phosphatase activity,GO:0033192~calmodulin-dependent protein phosphatase activity,GO:0043169~cation binding,GO:0046872~metal ion binding,
A0A0B4J2A3	PPP1R14A	0.11732	GO:0035304~regulation of protein dephosphorylation,GO:0035690~cellular response to drug,GO:0042325~regulation of phosphorylation,GO:0043086~negative regulation of catalytic activity,	GO:0005737~cytoplasm,GO:0005829~cytosol,	GO:0004865~protein serine/threonine phosphatase inhibitor activity,	hsa04270:Vascular smooth muscle contraction,
A0A0G2JHC2	PPP1R18	0.033401		GO:0005737~cytoplasm,GO:0005856~cytoskeleton,	GO:0003779~actin binding,GO:0005515~protein binding,GO:0019902~phosphatase binding,
P32119	PRDX2	0.644764	GO:0000302~response to reactive oxygen species,GO:0006979~response to oxidative stress,GO:0019430~removal of superoxide radicals,GO:0034599~cellular response to oxidative stress,GO:0042744~hydrogen peroxide catabolic process,GO:0042981~regulation of apoptotic process,GO:0043066~negative regulation of apoptotic process,GO:0045454~cell redox homeostasis,GO:0055114~oxidation-reduction process,	GO:0005623~cell,GO:0005737~cytoplasm,GO:0005829~cytosol,GO:0070062~extracellular exosome,	GO:0008379~thioredoxin peroxidase activity,GO:0016209~antioxidant activity,
P30048	PRDX3	0.000167053	GO:0000302~response to reactive oxygen species,GO:0001893~maternal placenta development,GO:0006915~apoptotic process,GO:0006979~response to oxidative stress,GO:0007005~mitochondrion organization,GO:0008284~positive regulation of cell proliferation,GO:0018171~peptidyl-cysteine oxidation,GO:0030099~myeloid cell differentiation,GO:0032496~response to lipopolysaccharide,GO:0033673~negative regulation…	GO:0005737~cytoplasm,GO:0005739~mitochondrion,GO:0005759~mitochondrial matrix,GO:0005769~early endosome,GO:0005829~cytosol,GO:0008385~IkappaB kinase complex,GO:0043209~myelin sheath,GO:0070062~extracellular exosome,	GO:0005515~protein binding,GO:0008022~protein C-terminus binding,GO:0008379~thioredoxin peroxidase activity,GO:0008785~alkyl hydroperoxide reductase activity,GO:0019900~kinase binding,GO:0019901~protein kinase binding,GO:0042802~identical protein binding,GO:0043027~cysteine-type endopeptidase inhibitor activity involved in apoptotic process,
B1ALA9	PRPS1	0.00278405	GO:0006015~5-phosphoribose 1-diphosphate biosynthetic process,GO:0006144~purine nucleobase metabolic process,GO:0006164~purine nucleotide biosynthetic process,GO:0006167~AMP biosynthetic process,GO:0006221~pyrimidine nucleotide biosynthetic process,GO:0007399~nervous system development,GO:0009116~nucleoside metabolic process,GO:0009156~ribonucleoside monophosphate biosynthetic process,GO:0009165~…	GO:0002189~ribose phosphate diphosphokinase complex,GO:0005829~cytosol,	GO:0000287~magnesium ion binding,GO:0004749~ribose phosphate diphosphokinase activity,GO:0005515~protein binding,GO:0005524~ATP binding,GO:0016208~AMP binding,GO:0016301~kinase activity,GO:0019003~GDP binding,GO:0030246~carbohydrate binding,GO:0042802~identical protein binding,GO:0042803~protein homodimerization activity,GO:0043531~ADP binding,	hsa00030:Pentose phosphate pathway,hsa00230:Purine metabolism,hsa01100:Metabolic pathways,hsa01130:Biosynthesis of antibiotics,hsa01200:Carbon metabolism,hsa01230:Biosynthesis of amino acids,
Q96M27	PRRC1	0.126859		GO:0005794~Golgi apparatus,	GO:0005515~protein binding,
Q9Y617	PSAT1	0.00082594	GO:0006564~L-serine biosynthetic process,GO:0008615~pyridoxine biosynthetic process,	GO:0005737~cytoplasm,GO:0005829~cytosol,GO:0070062~extracellular exosome,	GO:0004648~O-phospho-L-serine:2-oxoglutarate aminotransferase activity,GO:0008483~transaminase activity,	hsa00260:Glycine, serine and threonine metabolism,hsa00750:Vitamin B6 metabolism,hsa01100:Metabolic pathways,hsa01130:Biosynthesis of antibiotics,hsa01200:Carbon metabolism,hsa01230:Biosynthesis of amino acids,
F2Z3J9	PTGR1	3.08629e-05	GO:0006691~leukotriene metabolic process,GO:0006693~prostaglandin metabolic process,GO:0055114~oxidation-reduction process,	GO:0005737~cytoplasm,GO:0070062~extracellular exosome,	GO:0008270~zinc ion binding,GO:0016491~oxidoreductase activity,GO:0032440~2-alkenal reductase [NAD(P)] activity,GO:0036132~13-prostaglandin reductase activity,GO:0047522~15-oxoprostaglandin 13-oxidase activity,
H0YEH2	PUM1	0.686817	GO:0007283~spermatogenesis,GO:0008344~adult locomotory behavior,GO:0010608~posttranscriptional regulation of gene expression,GO:0016441~posttranscriptional gene silencing,GO:0043488~regulation of mRNA stability,GO:0048863~stem cell differentiation,GO:0051726~regulation of cell cycle,GO:0051983~regulation of chromosome segregation,GO:0060964~regulation of gene silencing by miRNA,GO:0061157~mRNA de…	GO:0000932~cytoplasmic mRNA processing body,GO:0005829~cytosol,GO:0010494~cytoplasmic stress granule,	GO:0003723~RNA binding,GO:0003730~mRNA 3'-UTR binding,GO:0005515~protein binding,GO:0044822~poly(A) RNA binding,
P32322	PYCR1	0.085456	GO:0006561~proline biosynthetic process,GO:0008652~cellular amino acid biosynthetic process,GO:0034599~cellular response to oxidative stress,GO:0051881~regulation of mitochondrial membrane potential,GO:0055114~oxidation-reduction process,GO:0055129~L-proline biosynthetic process,GO:1903206~negative regulation of hydrogen peroxide-induced cell death,	GO:0005739~mitochondrion,GO:0005759~mitochondrial matrix,	GO:0004735~pyrroline-5-carboxylate reductase activity,GO:0005515~protein binding,GO:0042802~identical protein binding,	hsa00330:Arginine and proline metabolism,hsa01100:Metabolic pathways,hsa01130:Biosynthesis of antibiotics,hsa01230:Biosynthesis of amino acids,
A0A087WTV6	PYCR2	0.109202	GO:0006561~proline biosynthetic process,GO:0008652~cellular amino acid biosynthetic process,GO:0034599~cellular response to oxidative stress,GO:0055114~oxidation-reduction process,GO:0055129~L-proline biosynthetic process,	GO:0005739~mitochondrion,GO:0005759~mitochondrial matrix,	GO:0004735~pyrroline-5-carboxylate reductase activity,	hsa00330:Arginine and proline metabolism,hsa01100:Metabolic pathways,hsa01130:Biosynthesis of antibiotics,hsa01230:Biosynthesis of amino acids,
P09417	QDPR	0.938154	GO:0001889~liver development,GO:0006520~cellular amino acid metabolic process,GO:0006559~L-phenylalanine catabolic process,GO:0006729~tetrahydrobiopterin biosynthetic process,GO:0010044~response to aluminum ion,GO:0010288~response to lead ion,GO:0033762~response to glucagon,GO:0035690~cellular response to drug,GO:0051066~dihydrobiopterin metabolic process,GO:0055114~oxidation-reduction process,	GO:0005737~cytoplasm,GO:0005739~mitochondrion,GO:0005829~cytosol,GO:0043005~neuron projection,GO:0070062~extracellular exosome,	GO:0004155~6,7-dihydropteridine reductase activity,GO:0009055~electron carrier activity,GO:0042803~protein homodimerization activity,GO:0070402~NADPH binding,GO:0070404~NADH binding,	hsa00790:Folate biosynthesis,hsa01100:Metabolic pathways,
Q15274	QPRT	7.68294e-05	GO:0009435~NAD biosynthetic process,GO:0019674~NAD metabolic process,GO:0034213~quinolinate catabolic process,GO:0051259~protein oligomerization,	GO:0005737~cytoplasm,GO:0005829~cytosol,GO:0070062~extracellular exosome,	GO:0004514~nicotinate-nucleotide diphosphorylase (carboxylating) activity,GO:0042803~protein homodimerization activity,	hsa00760:Nicotinate and nicotinamide metabolism,hsa01100:Metabolic pathways,
Q15042	RAB3GAP1	0.955657	GO:0007420~brain development,GO:0010628~positive regulation of gene expression,GO:0021854~hypothalamus development,GO:0034389~lipid particle organization,GO:0043010~camera-type eye development,GO:0043087~regulation of GTPase activity,GO:0043547~positive regulation of GTPase activity,GO:0048172~regulation of short-term neuronal synaptic plasticity,GO:0060079~excitatory postsynaptic potential,GO:00…	GO:0005789~endoplasmic reticulum membrane,GO:0005794~Golgi apparatus,GO:0005811~lipid particle,GO:0043234~protein complex,GO:0070062~extracellular exosome,GO:0071782~endoplasmic reticulum tubular network,GO:0098794~postsynapse,	GO:0005085~guanyl-nucleotide exchange factor activity,GO:0005096~GTPase activator activity,GO:0017112~Rab guanyl-nucleotide exchange factor activity,GO:0017137~Rab GTPase binding,
P52306	RAP1GDS1	0.0222487	GO:0007264~small GTPase mediated signal transduction,GO:0014829~vascular smooth muscle contraction,GO:0031034~myosin filament assembly,GO:0032471~negative regulation of endoplasmic reticulum calcium ion concentration,GO:0043547~positive regulation of GTPase activity,GO:0051561~positive regulation of mitochondrial calcium ion concentration,	GO:0005739~mitochondrion,GO:0005783~endoplasmic reticulum,GO:0005829~cytosol,GO:0070062~extracellular exosome,	GO:0005096~GTPase activator activity,GO:0005515~protein binding,
P09455	RBP1	6.42623e-05	GO:0001523~retinoid metabolic process,GO:0002138~retinoic acid biosynthetic process,GO:0006776~vitamin A metabolic process,GO:0006810~transport,GO:0030852~regulation of granulocyte differentiation,GO:0033189~response to vitamin A,GO:0042572~retinol metabolic process,	GO:0005654~nucleoplasm,GO:0005737~cytoplasm,GO:0005829~cytosol,GO:0044297~cell body,	GO:0005215~transporter activity,GO:0005501~retinoid binding,GO:0008289~lipid binding,GO:0016918~retinal binding,GO:0019841~retinol binding,
P13489	RNH1	0.0423097	GO:0006402~mRNA catabolic process,GO:0043086~negative regulation of catalytic activity,GO:0045765~regulation of angiogenesis,	GO:0005654~nucleoplasm,GO:0005737~cytoplasm,GO:0032311~angiogenin-PRI complex,GO:0070062~extracellular exosome,	GO:0005515~protein binding,GO:0008428~ribonuclease inhibitor activity,
P49247	RPIA	0.00477733	GO:0006098~pentose-phosphate shunt,GO:0009052~pentose-phosphate shunt, non-oxidative branch,	GO:0005829~cytosol,GO:0016021~integral component of membrane,GO:0043231~intracellular membrane-bounded organelle,	GO:0004751~ribose-5-phosphate isomerase activity,GO:0005515~protein binding,GO:0042802~identical protein binding,GO:0048029~monosaccharide binding,	hsa00030:Pentose phosphate pathway,hsa01100:Metabolic pathways,hsa01130:Biosynthesis of antibiotics,hsa01200:Carbon metabolism,hsa01230:Biosynthesis of amino acids,
C9JYQ9	RPL22L1	0.00178953	GO:0002181~cytoplasmic translation,GO:0006412~translation,	GO:0005840~ribosome,GO:0022625~cytosolic large ribosomal subunit,	GO:0003735~structural constituent of ribosome,	hsa03010:Ribosome,
J3KT73	RPL38	0.470458	GO:0000184~nuclear-transcribed mRNA catabolic process, nonsense-mediated decay,GO:0001501~skeletal system development,GO:0001503~ossification,GO:0006364~rRNA processing,GO:0006412~translation,GO:0006413~translational initiation,GO:0006417~regulation of translation,GO:0006614~SRP-dependent cotranslational protein targeting to membrane,GO:0007605~sensory perception of sound,GO:0019083~viral transcr…	GO:0005829~cytosol,GO:0005840~ribosome,GO:0005925~focal adhesion,GO:0022625~cytosolic large ribosomal subunit,GO:0033291~eukaryotic 80S initiation complex,	GO:0003723~RNA binding,GO:0003735~structural constituent of ribosome,	hsa03010:Ribosome,
P05386	RPLP1	0.728984	GO:0000184~nuclear-transcribed mRNA catabolic process, nonsense-mediated decay,GO:0002181~cytoplasmic translation,GO:0006364~rRNA processing,GO:0006412~translation,GO:0006413~translational initiation,GO:0006414~translational elongation,GO:0006614~SRP-dependent cotranslational protein targeting to membrane,GO:0019083~viral transcription,GO:0032147~activation of protein kinase activity,GO:0045860~p…	GO:0005737~cytoplasm,GO:0005829~cytosol,GO:0005840~ribosome,GO:0005925~focal adhesion,GO:0022625~cytosolic large ribosomal subunit,GO:0030687~preribosome, large subunit precursor,GO:0070062~extracellular exosome,	GO:0003735~structural constituent of ribosome,GO:0005515~protein binding,GO:0030295~protein kinase activator activity,GO:0070180~large ribosomal subunit rRNA binding,	hsa03010:Ribosome,
Q8WVC2	RPS21	0.0276444	GO:0000184~nuclear-transcribed mRNA catabolic process, nonsense-mediated decay,GO:0000447~endonucleolytic cleavage in ITS1 to separate SSU-rRNA from 5.8S rRNA and LSU-rRNA from tricistronic rRNA transcript (SSU-rRNA, 5.8S rRNA, LSU-rRNA),GO:0000461~endonucleolytic cleavage to generate mature 3'-end of SSU-rRNA from (SSU-rRNA, 5.8S rRNA, LSU-rRNA),GO:0006364~rRNA processing,GO:0006412~translation,…	GO:0005654~nucleoplasm,GO:0005737~cytoplasm,GO:0005829~cytosol,GO:0005840~ribosome,GO:0015935~small ribosomal subunit,GO:0022627~cytosolic small ribosomal subunit,	GO:0003735~structural constituent of ribosome,GO:0044822~poly(A) RNA binding,GO:0047485~protein N-terminus binding,	hsa03010:Ribosome,
Q15404	RSU1	0.000128592	GO:0007165~signal transduction,GO:0010810~regulation of cell-substrate adhesion,GO:0010811~positive regulation of cell-substrate adhesion,GO:0043547~positive regulation of GTPase activity,	GO:0005829~cytosol,GO:0005925~focal adhesion,GO:0070062~extracellular exosome,	GO:0005515~protein binding,
Q9Y3I0	RTCB	0.0651907	GO:0001701~in utero embryonic development,GO:0001890~placenta development,GO:0006388~tRNA splicing, via endonucleolytic cleavage and ligation,	GO:0005634~nucleus,GO:0005635~nuclear envelope,GO:0005654~nucleoplasm,GO:0005737~cytoplasm,GO:0005789~endoplasmic reticulum membrane,GO:0072669~tRNA-splicing ligase complex,	GO:0003972~RNA ligase (ATP) activity,GO:0005515~protein binding,GO:0005524~ATP binding,GO:0017166~vinculin binding,GO:0044822~poly(A) RNA binding,GO:0046872~metal ion binding,
M0QX29	SARS2	0.704657	GO:0006418~tRNA aminoacylation for protein translation,GO:0006434~seryl-tRNA aminoacylation,GO:0097056~selenocysteinyl-tRNA(Sec) biosynthetic process,	GO:0005737~cytoplasm,GO:0005739~mitochondrion,GO:0005759~mitochondrial matrix,	GO:0004828~serine-tRNA ligase activity,GO:0005524~ATP binding,GO:0044822~poly(A) RNA binding,	hsa00970:Aminoacyl-tRNA biosynthesis,
H7C4A1	SCLY	0.300398	GO:0001887~selenium compound metabolic process,GO:0006520~cellular amino acid metabolic process,	GO:0005829~cytosol,	GO:0003824~catalytic activity,GO:0005515~protein binding,GO:0009000~selenocysteine lyase activity,GO:0016740~transferase activity,GO:0016829~lyase activity,	hsa00450:Selenocompound metabolism,hsa01100:Metabolic pathways,
A0A0C4DGB0	SCOC	0.757662	GO:0016239~positive regulation of macroautophagy,GO:0061635~regulation of protein complex stability,	GO:0000139~Golgi membrane,GO:0005768~endosome,GO:0005802~trans-Golgi network,GO:0005829~cytosol,	GO:0005515~protein binding,
Q9HB40	SCPEP1	0.0539141	GO:0042573~retinoic acid metabolic process,GO:0045776~negative regulation of blood pressure,GO:0045909~positive regulation of vasodilation,GO:0051603~proteolysis involved in cellular protein catabolic process,	GO:0005829~cytosol,GO:0070062~extracellular exosome,	GO:0004185~serine-type carboxypeptidase activity,
P31040	SDHA	0.0455294	GO:0006099~tricarboxylic acid cycle,GO:0006105~succinate metabolic process,GO:0006121~mitochondrial electron transport, succinate to ubiquinone,GO:0007399~nervous system development,GO:0009061~anaerobic respiration,GO:0022900~electron transport chain,GO:0022904~respiratory electron transport chain,GO:0055114~oxidation-reduction process,	GO:0005739~mitochondrion,GO:0005743~mitochondrial inner membrane,GO:0005749~mitochondrial respiratory chain complex II, succinate dehydrogenase complex (ubiquinone),GO:0016020~membrane,GO:0043209~myelin sheath,	GO:0000104~succinate dehydrogenase activity,GO:0005515~protein binding,GO:0008177~succinate dehydrogenase (ubiquinone) activity,GO:0009055~electron carrier activity,GO:0016491~oxidoreductase activity,GO:0050660~flavin adenine dinucleotide binding,	hsa00020:Citrate cycle (TCA cycle),hsa00190:Oxidative phosphorylation,hsa01100:Metabolic pathways,hsa01130:Biosynthesis of antibiotics,hsa01200:Carbon metabolism,hsa04932:Non-alcoholic fatty liver disease (NAFLD),hsa05010:Alzheimer's disease,hsa05012:Parkinson's disease,hsa05016:Huntington's disease,
P21912	SDHB	0.0567414	GO:0006099~tricarboxylic acid cycle,GO:0006105~succinate metabolic process,GO:0009060~aerobic respiration,GO:0022904~respiratory electron transport chain,	GO:0005654~nucleoplasm,GO:0005739~mitochondrion,GO:0005743~mitochondrial inner membrane,GO:0005749~mitochondrial respiratory chain complex II, succinate dehydrogenase complex (ubiquinone),GO:0005886~plasma membrane,GO:0031966~mitochondrial membrane,GO:0045273~respiratory chain complex II,GO:0070062~extracellular exosome,	GO:0000104~succinate dehydrogenase activity,GO:0005515~protein binding,GO:0008177~succinate dehydrogenase (ubiquinone) activity,GO:0009055~electron carrier activity,GO:0016491~oxidoreductase activity,GO:0046872~metal ion binding,GO:0048039~ubiquinone binding,GO:0051537~2 iron, 2 sulfur cluster binding,GO:0051538~3 iron, 4 sulfur cluster binding,GO:0051539~4 iron, 4 sulfur cluster binding,	hsa00020:Citrate cycle (TCA cycle),hsa00190:Oxidative phosphorylation,hsa01100:Metabolic pathways,hsa01130:Biosynthesis of antibiotics,hsa01200:Carbon metabolism,hsa04932:Non-alcoholic fatty liver disease (NAFLD),hsa05010:Alzheimer's disease,hsa05012:Parkinson's disease,hsa05016:Huntington's disease,
A0A3F2YNX0	SEC16A	0.00142451	GO:0007029~endoplasmic reticulum organization,GO:0015031~protein transport,GO:0021762~substantia nigra development,GO:0048208~COPII vesicle coating,	GO:0000139~Golgi membrane,GO:0005737~cytoplasm,GO:0005789~endoplasmic reticulum membrane,GO:0005794~Golgi apparatus,GO:0005829~cytosol,	GO:0005515~protein binding,
F5H365	SEC23A	0.00744046	GO:0002474~antigen processing and presentation of peptide antigen via MHC class I,GO:0006886~intracellular protein transport,GO:0006888~ER to Golgi vesicle-mediated transport,GO:0016192~vesicle-mediated transport,GO:0019886~antigen processing and presentation of exogenous peptide antigen via MHC class II,GO:0048208~COPII vesicle coating,	GO:0000139~Golgi membrane,GO:0005783~endoplasmic reticulum,GO:0005789~endoplasmic reticulum membrane,GO:0005829~cytosol,GO:0012507~ER to Golgi transport vesicle membrane,GO:0030127~COPII vesicle coat,GO:0030868~smooth endoplasmic reticulum membrane,GO:0048471~perinuclear region of cytoplasm,	GO:0005515~protein binding,GO:0008270~zinc ion binding,	hsa04141:Protein processing in endoplasmic reticulum,
Q9Y6Y8	SEC23IP	0.535617	GO:0006886~intracellular protein transport,GO:0006888~ER to Golgi vesicle-mediated transport,GO:0007030~Golgi organization,GO:0048208~COPII vesicle coating,	GO:0000139~Golgi membrane,GO:0005737~cytoplasm,GO:0005783~endoplasmic reticulum,GO:0005793~endoplasmic reticulum-Golgi intermediate compartment,GO:0005829~cytosol,GO:0012507~ER to Golgi transport vesicle membrane,GO:0030134~ER to Golgi transport vesicle,	GO:0004620~phospholipase activity,GO:0005515~protein binding,GO:0044822~poly(A) RNA binding,GO:0046872~metal ion binding,
O95486	SEC24A	0.000300064	GO:0002474~antigen processing and presentation of peptide antigen via MHC class I,GO:0006886~intracellular protein transport,GO:0006888~ER to Golgi vesicle-mediated transport,GO:0019886~antigen processing and presentation of exogenous peptide antigen via MHC class II,GO:0045714~regulation of low-density lipoprotein particle receptor biosynthetic process,GO:0048208~COPII vesicle coating,GO:0050714…	GO:0000139~Golgi membrane,GO:0005789~endoplasmic reticulum membrane,GO:0005829~cytosol,GO:0012507~ER to Golgi transport vesicle membrane,GO:0030127~COPII vesicle coat,GO:0048471~perinuclear region of cytoplasm,	GO:0005515~protein binding,GO:0008270~zinc ion binding,	hsa04141:Protein processing in endoplasmic reticulum,
E9PC44	SEC24D	8.47682e-05	GO:0001701~in utero embryonic development,GO:0002474~antigen processing and presentation of peptide antigen via MHC class I,GO:0006886~intracellular protein transport,GO:0006888~ER to Golgi vesicle-mediated transport,GO:0019886~antigen processing and presentation of exogenous peptide antigen via MHC class II,GO:0048208~COPII vesicle coating,	GO:0000139~Golgi membrane,GO:0005789~endoplasmic reticulum membrane,GO:0005829~cytosol,GO:0012507~ER to Golgi transport vesicle membrane,GO:0030127~COPII vesicle coat,GO:0048471~perinuclear region of cytoplasm,	GO:0005515~protein binding,GO:0008270~zinc ion binding,	hsa04141:Protein processing in endoplasmic reticulum,
O94979	SEC31A	0.00343515	GO:0002474~antigen processing and presentation of peptide antigen via MHC class I,GO:0006888~ER to Golgi vesicle-mediated transport,GO:0015031~protein transport,GO:0019886~antigen processing and presentation of exogenous peptide antigen via MHC class II,GO:0036498~IRE1-mediated unfolded protein response,GO:0048208~COPII vesicle coating,GO:0051592~response to calcium ion,	GO:0000139~Golgi membrane,GO:0005737~cytoplasm,GO:0005783~endoplasmic reticulum,GO:0005789~endoplasmic reticulum membrane,GO:0005829~cytosol,GO:0012507~ER to Golgi transport vesicle membrane,GO:0030120~vesicle coat,GO:0030127~COPII vesicle coat,GO:0030134~ER to Golgi transport vesicle,GO:0043231~intracellular membrane-bounded organelle,GO:0048471~perinuclear region of cytoplasm,GO:0070971~endopla…	GO:0005515~protein binding,GO:0048306~calcium-dependent protein binding,	hsa04141:Protein processing in endoplasmic reticulum,
H0Y3V8	SGPL1	0.00043094	GO:0001553~luteinization,GO:0001570~vasculogenesis,GO:0001822~kidney development,GO:0006631~fatty acid metabolic process,GO:0006672~ceramide metabolic process,GO:0007283~spermatogenesis,GO:0008209~androgen metabolic process,GO:0008210~estrogen metabolic process,GO:0009791~post-embryonic development,GO:0010761~fibroblast migration,GO:0030097~hemopoiesis,GO:0030148~sphingolipid biosynthetic process…	GO:0005783~endoplasmic reticulum,GO:0005789~endoplasmic reticulum membrane,GO:0016021~integral component of membrane,GO:0030176~integral component of endoplasmic reticulum membrane,	GO:0005515~protein binding,GO:0008117~sphinganine-1-phosphate aldolase activity,GO:0016831~carboxy-lyase activity,GO:0030170~pyridoxal phosphate binding,	hsa00600:Sphingolipid metabolism,hsa01100:Metabolic pathways,hsa04071:Sphingolipid signaling pathway,
O43765	SGTA	0.00426821	GO:0016032~viral process,GO:1903071~positive regulation of ER-associated ubiquitin-dependent protein catabolic process,	GO:0005634~nucleus,GO:0005737~cytoplasm,GO:0005829~cytosol,GO:0016020~membrane,	GO:0005515~protein binding,GO:1904288~BAT3 complex binding,
B7ZC39	SH3GLB2	0.00395703	GO:0098609~cell-cell adhesion,	GO:0005634~nucleus,GO:0005737~cytoplasm,GO:0005913~cell-cell adherens junction,	GO:0005515~protein binding,GO:0042802~identical protein binding,GO:0098641~cadherin binding involved in cell-cell adhesion,	hsa04144:Endocytosis,
P34897	SHMT2	0.0277257	GO:0006544~glycine metabolic process,GO:0006563~L-serine metabolic process,GO:0006564~L-serine biosynthetic process,GO:0006730~one-carbon metabolic process,GO:0008284~positive regulation of cell proliferation,GO:0019264~glycine biosynthetic process from serine,GO:0034340~response to type I interferon,GO:0035999~tetrahydrofolate interconversion,GO:0046653~tetrahydrofolate metabolic process,GO:0046…	GO:0005634~nucleus,GO:0005737~cytoplasm,GO:0005739~mitochondrion,GO:0005743~mitochondrial inner membrane,GO:0005758~mitochondrial intermembrane space,GO:0005759~mitochondrial matrix,GO:0015630~microtubule cytoskeleton,GO:0042645~mitochondrial nucleoid,GO:0070062~extracellular exosome,GO:0070552~BRISC complex,	GO:0003682~chromatin binding,GO:0004372~glycine hydroxymethyltransferase activity,GO:0005515~protein binding,GO:0008168~methyltransferase activity,GO:0008732~L-allo-threonine aldolase activity,GO:0016597~amino acid binding,GO:0016740~transferase activity,GO:0030170~pyridoxal phosphate binding,GO:0042802~identical protein binding,	hsa00260:Glycine, serine and threonine metabolism,hsa00460:Cyanoamino acid metabolism,hsa00630:Glyoxylate and dicarboxylate metabolism,hsa00670:One carbon pool by folate,hsa01100:Metabolic pathways,hsa01130:Biosynthesis of antibiotics,hsa01200:Carbon metabolism,hsa01230:Biosynthesis of amino acids,
Q9H2G2	SLK	0.604225	GO:0006915~apoptotic process,GO:0023014~signal transduction by protein phosphorylation,GO:0030334~regulation of cell migration,GO:0031122~cytoplasmic microtubule organization,GO:0042981~regulation of apoptotic process,GO:0046777~protein autophosphorylation,GO:0051893~regulation of focal adhesion assembly,GO:0098609~cell-cell adhesion,	GO:0005737~cytoplasm,GO:0005913~cell-cell adherens junction,GO:0031252~cell leading edge,GO:0048471~perinuclear region of cytoplasm,GO:0070062~extracellular exosome,	GO:0004674~protein serine/threonine kinase activity,GO:0004702~receptor signaling protein serine/threonine kinase activity,GO:0005515~protein binding,GO:0005524~ATP binding,GO:0042802~identical protein binding,GO:0042803~protein homodimerization activity,GO:0098641~cadherin binding involved in cell-cell adhesion,	hsa04114:Oocyte meiosis,
P52788	SMS	0.000115111	GO:0006555~methionine metabolic process,GO:0006595~polyamine metabolic process,GO:0006597~spermine biosynthetic process,	GO:0005829~cytosol,GO:0070062~extracellular exosome,	GO:0016768~spermine synthase activity,	hsa00270:Cysteine and methionine metabolism,hsa00330:Arginine and proline metabolism,hsa00410:beta-Alanine metabolism,hsa00480:Glutathione metabolism,hsa01100:Metabolic pathways,
O60493	SNX3	0.0398226	GO:0009617~response to bacterium,GO:0010324~membrane invagination,GO:0010976~positive regulation of neuron projection development,GO:0015031~protein transport,GO:0016055~Wnt signaling pathway,GO:0022615~protein to membrane docking,GO:0030111~regulation of Wnt signaling pathway,GO:0042177~negative regulation of protein catabolic process,GO:0046597~negative regulation of viral entry into host cell,…	GO:0005737~cytoplasm,GO:0005769~early endosome,GO:0005829~cytosol,GO:0010008~endosome membrane,GO:0019898~extrinsic component of membrane,GO:0030136~clathrin-coated vesicle,GO:0030904~retromer complex,GO:0031901~early endosome membrane,GO:0032009~early phagosome,GO:0070062~extracellular exosome,	GO:0005515~protein binding,GO:0010314~phosphatidylinositol-5-phosphate binding,GO:0019903~protein phosphatase binding,GO:0032266~phosphatidylinositol-3-phosphate binding,GO:0070273~phosphatidylinositol-4-phosphate binding,GO:0080025~phosphatidylinositol-3,5-bisphosphate binding,	hsa04144:Endocytosis,
F8W9T3	SNX4	0.517124	GO:0006897~endocytosis,GO:0015031~protein transport,GO:0016050~vesicle organization,GO:0032456~endocytic recycling,GO:1903595~positive regulation of histamine secretion by mast cell,	GO:0005737~cytoplasm,GO:0005868~cytoplasmic dynein complex,GO:0005886~plasma membrane,GO:0016020~membrane,GO:0019898~extrinsic component of membrane,GO:0031201~SNARE complex,GO:0031901~early endosome membrane,GO:0043234~protein complex,	GO:0005154~epidermal growth factor receptor binding,GO:0005158~insulin receptor binding,GO:0005515~protein binding,GO:0035091~phosphatidylinositol binding,GO:1990459~transferrin receptor binding,GO:1990460~leptin receptor binding,	hsa04144:Endocytosis,
P04179	SOD2	0.000203488	GO:0000302~response to reactive oxygen species,GO:0000303~response to superoxide,GO:0001306~age-dependent response to oxidative stress,GO:0001315~age-dependent response to reactive oxygen species,GO:0001666~response to hypoxia,GO:0001836~release of cytochrome c from mitochondria,GO:0001889~liver development,GO:0003032~detection of oxygen,GO:0003069~vasodilation by acetylcholine involved in regula…	GO:0005739~mitochondrion,GO:0005743~mitochondrial inner membrane,GO:0005759~mitochondrial matrix,GO:0042645~mitochondrial nucleoid,GO:0043209~myelin sheath,GO:0070062~extracellular exosome,	GO:0003677~DNA binding,GO:0004784~superoxide dismutase activity,GO:0019825~oxygen binding,GO:0030145~manganese ion binding,GO:0042802~identical protein binding,GO:0046872~metal ion binding,	hsa04068:FoxO signaling pathway,hsa04146:Peroxisome,hsa05016:Huntington's disease,
F8VS10	SPATS2	0.0571242		GO:0005737~cytoplasm,	GO:0044822~poly(A) RNA binding,
P19623	SRM	0.000188227	GO:0006595~polyamine metabolic process,GO:0008295~spermidine biosynthetic process,	GO:0005829~cytosol,	GO:0004766~spermidine synthase activity,GO:0005515~protein binding,GO:0042802~identical protein binding,GO:0042803~protein homodimerization activity,	hsa00270:Cysteine and methionine metabolism,hsa00330:Arginine and proline metabolism,hsa00410:beta-Alanine metabolism,hsa00480:Glutathione metabolism,hsa01100:Metabolic pathways,
P49458	SRP9	0.781009	GO:0006614~SRP-dependent cotranslational protein targeting to membrane,GO:0006616~SRP-dependent cotranslational protein targeting to membrane, translocation,GO:0045900~negative regulation of translational elongation,	GO:0005785~signal recognition particle receptor complex,GO:0005786~signal recognition particle, endoplasmic reticulum targeting,GO:0005829~cytosol,GO:0048500~signal recognition particle,GO:0070062~extracellular exosome,	GO:0003723~RNA binding,GO:0005047~signal recognition particle binding,GO:0005515~protein binding,GO:0008312~7S RNA binding,	hsa03060:Protein export,
C9JA28	SSR3	0.000110078	GO:0006614~SRP-dependent cotranslational protein targeting to membrane,	GO:0005622~intracellular,GO:0005789~endoplasmic reticulum membrane,GO:0016021~integral component of membrane,		hsa04141:Protein processing in endoplasmic reticulum,
P50502	ST13	0.000591946	GO:0006457~protein folding,GO:0051260~protein homooligomerization,GO:0061084~negative regulation of protein refolding,GO:0070389~chaperone cofactor-dependent protein refolding,	GO:0005737~cytoplasm,GO:0005829~cytosol,GO:0043234~protein complex,GO:0070062~extracellular exosome,	GO:0005515~protein binding,GO:0019904~protein domain specific binding,GO:0030544~Hsp70 protein binding,GO:0030674~protein binding, bridging,GO:0032403~protein complex binding,GO:0032564~dATP binding,GO:0042802~identical protein binding,GO:0051082~unfolded protein binding,GO:0051087~chaperone binding,
Q92783	STAM	0.043904	GO:0006886~intracellular protein transport,GO:0006914~autophagy,GO:0007165~signal transduction,GO:0009967~positive regulation of signal transduction,GO:0016197~endosomal transport,GO:0036258~multivesicular body assembly,GO:0042059~negative regulation of epidermal growth factor receptor signaling pathway,GO:1903543~positive regulation of exosomal secretion,GO:1903551~regulation of extracellular ex…	GO:0005622~intracellular,GO:0005829~cytosol,GO:0031901~early endosome membrane,GO:0033565~ESCRT-0 complex,	GO:0005070~SH3/SH2 adaptor activity,GO:0005515~protein binding,	hsa04144:Endocytosis,hsa04630:Jak-STAT signaling pathway,
C9JDH9	STK25	0.405714	GO:0006468~protein phosphorylation,GO:0006979~response to oxidative stress,GO:0007163~establishment or maintenance of cell polarity,GO:0007165~signal transduction,GO:0023014~signal transduction by protein phosphorylation,GO:0032874~positive regulation of stress-activated MAPK cascade,GO:0036481~intrinsic apoptotic signaling pathway in response to hydrogen peroxide,GO:0042542~response to hydrogen …	GO:0000139~Golgi membrane,GO:0005737~cytoplasm,GO:0005794~Golgi apparatus,GO:0070062~extracellular exosome,	GO:0004672~protein kinase activity,GO:0004702~receptor signaling protein serine/threonine kinase activity,GO:0005515~protein binding,GO:0005524~ATP binding,GO:0042803~protein homodimerization activity,GO:0046872~metal ion binding,
P53597	SUCLG1	0.00161562	GO:0006099~tricarboxylic acid cycle,GO:0006104~succinyl-CoA metabolic process,GO:0006105~succinate metabolic process,GO:0008152~metabolic process,GO:0009142~nucleoside triphosphate biosynthetic process,	GO:0005737~cytoplasm,GO:0005739~mitochondrion,GO:0005743~mitochondrial inner membrane,GO:0005759~mitochondrial matrix,GO:0005829~cytosol,GO:0005886~plasma membrane,GO:0070062~extracellular exosome,	GO:0004775~succinate-CoA ligase (ADP-forming) activity,GO:0004776~succinate-CoA ligase (GDP-forming) activity,GO:0005525~GTP binding,GO:0016874~ligase activity,GO:0044822~poly(A) RNA binding,GO:0048037~cofactor binding,	hsa00020:Citrate cycle (TCA cycle),hsa00640:Propanoate metabolism,hsa01100:Metabolic pathways,hsa01130:Biosynthesis of antibiotics,hsa01200:Carbon metabolism,
Q01995	TAGLN	1.3084e-05	GO:0007517~muscle organ development,GO:0030855~epithelial cell differentiation,	GO:0005737~cytoplasm,	GO:0003779~actin binding,GO:0005515~protein binding,
Q92734	TFG	0.443251	GO:0007165~signal transduction,GO:0043123~positive regulation of I-kappaB kinase/NF-kappaB signaling,GO:0048208~COPII vesicle coating,	GO:0000139~Golgi membrane,GO:0005737~cytoplasm,GO:0005829~cytosol,GO:0070062~extracellular exosome,	GO:0004871~signal transducer activity,GO:0005515~protein binding,GO:0042802~identical protein binding,	hsa05200:Pathways in cancer,hsa05216:Thyroid cancer,
P62072	TIMM10	0.0149795	GO:0006626~protein targeting to mitochondrion,GO:0007605~sensory perception of sound,GO:0045039~protein import into mitochondrial inner membrane,GO:0072321~chaperone-mediated protein transport,	GO:0005739~mitochondrion,GO:0005743~mitochondrial inner membrane,GO:0005744~mitochondrial inner membrane presequence translocase complex,GO:0005758~mitochondrial intermembrane space,GO:0042719~mitochondrial intermembrane space protein transporter complex,	GO:0005215~transporter activity,GO:0005515~protein binding,GO:0008270~zinc ion binding,GO:0008565~protein transporter activity,GO:0042803~protein homodimerization activity,GO:0051087~chaperone binding,
Q9Y5J6	TIMM10B	0.182853	GO:0006626~protein targeting to mitochondrion,GO:0007160~cell-matrix adhesion,GO:0015031~protein transport,	GO:0005739~mitochondrion,GO:0005743~mitochondrial inner membrane,GO:0005758~mitochondrial intermembrane space,GO:0042719~mitochondrial intermembrane space protein transporter complex,	GO:0005515~protein binding,GO:0046872~metal ion binding,
O43615	TIMM44	0.00382475	GO:0006626~protein targeting to mitochondrion,GO:0030150~protein import into mitochondrial matrix,	GO:0005739~mitochondrion,GO:0005743~mitochondrial inner membrane,GO:0005759~mitochondrial matrix,	GO:0005515~protein binding,GO:0005524~ATP binding,GO:0051087~chaperone binding,
O60220	TIMM8A	0.0199021	GO:0007399~nervous system development,GO:0072321~chaperone-mediated protein transport,	GO:0005739~mitochondrion,GO:0005743~mitochondrial inner membrane,GO:0005758~mitochondrial intermembrane space,	GO:0005515~protein binding,GO:0046872~metal ion binding,
Q9Y5J7	TIMM9	0.0373681	GO:0006626~protein targeting to mitochondrion,GO:0007605~sensory perception of sound,GO:0015031~protein transport,GO:0045039~protein import into mitochondrial inner membrane,GO:0072321~chaperone-mediated protein transport,	GO:0005739~mitochondrion,GO:0005743~mitochondrial inner membrane,GO:0005758~mitochondrial intermembrane space,GO:0042719~mitochondrial intermembrane space protein transporter complex,GO:0042721~mitochondrial inner membrane protein insertion complex,	GO:0005215~transporter activity,GO:0005515~protein binding,GO:0008270~zinc ion binding,GO:0008565~protein transporter activity,GO:0042803~protein homodimerization activity,GO:0046872~metal ion binding,GO:0051087~chaperone binding,
O75663	TIPRL	0.000221368	GO:0000077~DNA damage checkpoint,GO:0034048~negative regulation of protein phosphatase type 2A activity,	GO:0005737~cytoplasm,GO:0043231~intracellular membrane-bounded organelle,	GO:0005515~protein binding,
P63313	TMSB10	0.00213888	GO:0007015~actin filament organization,GO:0030036~actin cytoskeleton organization,GO:0042989~sequestering of actin monomers,	GO:0005737~cytoplasm,GO:0031941~filamentous actin,	GO:0003785~actin monomer binding,GO:0005515~protein binding,
P55327	TPD52	0.000710515	GO:0009653~anatomical structure morphogenesis,GO:0030183~B cell differentiation,GO:0046903~secretion,	GO:0005737~cytoplasm,GO:0005783~endoplasmic reticulum,GO:0048471~perinuclear region of cytoplasm,	GO:0005509~calcium ion binding,GO:0005515~protein binding,GO:0042803~protein homodimerization activity,GO:0046982~protein heterodimerization activity,
E9PNK6	TPD52L1	9.06274e-05	GO:0000086~G2/M transition of mitotic cell cycle,GO:0043406~positive regulation of MAP kinase activity,GO:0046330~positive regulation of JNK cascade,GO:2001235~positive regulation of apoptotic signaling pathway,	GO:0005737~cytoplasm,GO:0048471~perinuclear region of cytoplasm,	GO:0005515~protein binding,GO:0042802~identical protein binding,GO:0042803~protein homodimerization activity,GO:0046982~protein heterodimerization activity,
O43399	TPD52L2	0.000133088	GO:0042127~regulation of cell proliferation,	GO:0005737~cytoplasm,GO:0048471~perinuclear region of cytoplasm,	GO:0042803~protein homodimerization activity,GO:0044822~poly(A) RNA binding,GO:0046982~protein heterodimerization activity,
A0A0S2Z4G6	TPM1	9.98038e-06	GO:0001701~in utero embryonic development,GO:0003065~positive regulation of heart rate by epinephrine,GO:0006928~movement of cell or subcellular component,GO:0006936~muscle contraction,GO:0006937~regulation of muscle contraction,GO:0007010~cytoskeleton organization,GO:0007015~actin filament organization,GO:0008016~regulation of heart contraction,GO:0008360~regulation of cell shape,GO:0030049~musc…	GO:0001725~stress fiber,GO:0005829~cytosol,GO:0005856~cytoskeleton,GO:0005862~muscle thin filament tropomyosin,GO:0005884~actin filament,GO:0016021~integral component of membrane,GO:0030016~myofibril,GO:0030017~sarcomere,GO:0031941~filamentous actin,GO:0032059~bleb,GO:0032587~ruffle membrane,	GO:0003779~actin binding,GO:0005200~structural constituent of cytoskeleton,GO:0005515~protein binding,GO:0008092~cytoskeletal protein binding,GO:0008307~structural constituent of muscle,GO:0051015~actin filament binding,	hsa04260:Cardiac muscle contraction,hsa04261:Adrenergic signaling in cardiomyocytes,hsa05206:MicroRNAs in cancer,hsa05410:Hypertrophic cardiomyopathy (HCM),hsa05414:Dilated cardiomyopathy,
H7BYY1	TPM1	0.000369629
Q6ZN40	TPM1	1.53862e-05
Q5TCU3	TPM2	0.125202	GO:0006936~muscle contraction,GO:0007015~actin filament organization,GO:0030049~muscle filament sliding,GO:0043462~regulation of ATPase activity,	GO:0005829~cytosol,GO:0005862~muscle thin filament tropomyosin,GO:0005884~actin filament,	GO:0003779~actin binding,GO:0008307~structural constituent of muscle,GO:0051015~actin filament binding,	hsa04260:Cardiac muscle contraction,hsa04261:Adrenergic signaling in cardiomyocytes,hsa05410:Hypertrophic cardiomyopathy (HCM),hsa05414:Dilated cardiomyopathy,
A0A087WWU8	TPM3	0.266662	GO:0006928~movement of cell or subcellular component,GO:0006936~muscle contraction,GO:0007015~actin filament organization,GO:0030049~muscle filament sliding,	GO:0001725~stress fiber,GO:0005829~cytosol,GO:0005856~cytoskeleton,GO:0005862~muscle thin filament tropomyosin,GO:0005884~actin filament,GO:0070062~extracellular exosome,	GO:0005515~protein binding,GO:0008307~structural constituent of muscle,GO:0051015~actin filament binding,	hsa04260:Cardiac muscle contraction,hsa04261:Adrenergic signaling in cardiomyocytes,hsa05200:Pathways in cancer,hsa05216:Thyroid cancer,hsa05410:Hypertrophic cardiomyopathy (HCM),hsa05414:Dilated cardiomyopathy,
P51580	TPMT	0.336787	GO:0006139~nucleobase-containing compound metabolic process,GO:0032259~methylation,	GO:0005829~cytosol,GO:0070062~extracellular exosome,	GO:0008119~thiopurine S-methyltransferase activity,	hsa00983:Drug metabolism - other enzymes,
Q9BW30	TPPP3	0.00799678	GO:0001578~microtubule bundle formation,GO:0046785~microtubule polymerization,	GO:0005737~cytoplasm,GO:0005874~microtubule,GO:0070062~extracellular exosome,	GO:0015631~tubulin binding,
H3BUK6	TRAPPC2L	0.280965	GO:0006888~ER to Golgi vesicle-mediated transport,GO:0048208~COPII vesicle coating,	GO:0000139~Golgi membrane,GO:0005737~cytoplasm,GO:0005783~endoplasmic reticulum,GO:0005829~cytosol,GO:0043231~intracellular membrane-bounded organelle,GO:0048471~perinuclear region of cytoplasm,	GO:0005515~protein binding,
J3QSA1	TRAPPC8	6.9282e-06	GO:0000045~autophagosome assembly,GO:0006888~ER to Golgi vesicle-mediated transport,GO:0030242~pexophagy,GO:0032258~CVT pathway,GO:0034497~protein localization to pre-autophagosomal structure,GO:0044804~nucleophagy,	GO:0000407~pre-autophagosomal structure,GO:0031410~cytoplasmic vesicle,GO:1990072~TRAPPIII protein complex,	GO:0005515~protein binding,
Q13630	TSTA3	1.02059e-05	GO:0007159~leukocyte cell-cell adhesion,GO:0009226~nucleotide-sugar biosynthetic process,GO:0019673~GDP-mannose metabolic process,GO:0019835~cytolysis,GO:0042351~'de novo' GDP-L-fucose biosynthetic process,GO:0055114~oxidation-reduction process,	GO:0005737~cytoplasm,GO:0005829~cytosol,GO:0070062~extracellular exosome,	GO:0003824~catalytic activity,GO:0009055~electron carrier activity,GO:0016491~oxidoreductase activity,GO:0016853~isomerase activity,GO:0042356~GDP-4-dehydro-D-rhamnose reductase activity,GO:0050577~GDP-L-fucose synthase activity,GO:0050662~coenzyme binding,	hsa00051:Fructose and mannose metabolism,hsa00520:Amino sugar and nucleotide sugar metabolism,hsa01100:Metabolic pathways,
Q99614	TTC1	0.448864	GO:0006457~protein folding,	GO:0005737~cytoplasm,GO:0005778~peroxisomal membrane,	GO:0005515~protein binding,GO:0051082~unfolded protein binding,
Q9H4B7	TUBB1	0.0083738	GO:0051225~spindle assembly,	GO:0005737~cytoplasm,GO:0005874~microtubule,GO:0070062~extracellular exosome,	GO:0003924~GTPase activity,GO:0005200~structural constituent of cytoskeleton,GO:0005525~GTP binding,	hsa04145:Phagosome,hsa04540:Gap junction,hsa05130:Pathogenic Escherichia coli infection,
Q6IBS0	TWF2	0.0429294	GO:0010592~positive regulation of lamellipodium assembly,GO:0010976~positive regulation of neuron projection development,GO:0030030~cell projection organization,GO:0030837~negative regulation of actin filament polymerization,GO:0032532~regulation of microvillus length,GO:0032956~regulation of actin cytoskeleton organization,GO:0042989~sequestering of actin monomers,GO:0045773~positive regulation …	GO:0005622~intracellular,GO:0005737~cytoplasm,GO:0005856~cytoskeleton,GO:0005913~cell-cell adherens junction,GO:0030016~myofibril,GO:0030027~lamellipodium,GO:0030175~filopodium,GO:0030426~growth cone,GO:0032420~stereocilium,GO:0048471~perinuclear region of cytoplasm,GO:0070062~extracellular exosome,	GO:0003785~actin monomer binding,GO:0005080~protein kinase C binding,GO:0005515~protein binding,GO:0005524~ATP binding,GO:0005546~phosphatidylinositol-4,5-bisphosphate binding,GO:0044822~poly(A) RNA binding,GO:0098641~cadherin binding involved in cell-cell adhesion,
Q9BRA2	TXNDC17	3.92952e-05	GO:0033209~tumor necrosis factor-mediated signaling pathway,GO:0055114~oxidation-reduction process,GO:0098869~cellular oxidant detoxification,	GO:0005829~cytosol,GO:0070062~extracellular exosome,	GO:0004601~peroxidase activity,GO:0005515~protein binding,GO:0047134~protein-disulfide reductase activity,
P19971	TYMP	8.67029e-06	GO:0001525~angiogenesis,GO:0006206~pyrimidine nucleobase metabolic process,GO:0006213~pyrimidine nucleoside metabolic process,GO:0006935~chemotaxis,GO:0030154~cell differentiation,GO:0043097~pyrimidine nucleoside salvage,GO:0046135~pyrimidine nucleoside catabolic process,	GO:0005829~cytosol,	GO:0004645~phosphorylase activity,GO:0008083~growth factor activity,GO:0009032~thymidine phosphorylase activity,GO:0016154~pyrimidine-nucleoside phosphorylase activity,GO:0016763~transferase activity, transferring pentosyl groups,	hsa00240:Pyrimidine metabolism,hsa00983:Drug metabolism - other enzymes,hsa01100:Metabolic pathways,hsa05219:Bladder cancer,
Q16222	UAP1	0.00730524	GO:0006047~UDP-N-acetylglucosamine metabolic process,GO:0006048~UDP-N-acetylglucosamine biosynthetic process,	GO:0005654~nucleoplasm,GO:0005737~cytoplasm,GO:0005829~cytosol,GO:0005886~plasma membrane,	GO:0003977~UDP-N-acetylglucosamine diphosphorylase activity,GO:0030246~carbohydrate binding,GO:0042802~identical protein binding,	hsa00520:Amino sugar and nucleotide sugar metabolism,hsa01100:Metabolic pathways,hsa01130:Biosynthesis of antibiotics,
A0AVT1	UBA6	0.000216649	GO:0006464~cellular protein modification process,GO:0006511~ubiquitin-dependent protein catabolic process,GO:0007612~learning,GO:0007626~locomotory behavior,GO:0016567~protein ubiquitination,GO:0021764~amygdala development,GO:0021766~hippocampus development,GO:0042787~protein ubiquitination involved in ubiquitin-dependent protein catabolic process,GO:0060996~dendritic spine development,	GO:0005737~cytoplasm,GO:0005829~cytosol,GO:0016021~integral component of membrane,	GO:0004839~ubiquitin activating enzyme activity,GO:0005515~protein binding,GO:0005524~ATP binding,GO:0008641~small protein activating enzyme activity,GO:0019780~FAT10 activating enzyme activity,	hsa04120:Ubiquitin mediated proteolysis,
P61086	UBE2K	0.769794	GO:0006511~ubiquitin-dependent protein catabolic process,GO:0010800~positive regulation of peptidyl-threonine phosphorylation,GO:0010994~free ubiquitin chain polymerization,GO:0032434~regulation of proteasomal ubiquitin-dependent protein catabolic process,GO:0035458~cellular response to interferon-beta,GO:0043161~proteasome-mediated ubiquitin-dependent protein catabolic process,GO:0060340~positiv…	GO:0005634~nucleus,GO:0005737~cytoplasm,GO:0032433~filopodium tip,GO:0070062~extracellular exosome,	GO:0004842~ubiquitin-protein transferase activity,GO:0005515~protein binding,GO:0005524~ATP binding,GO:0031625~ubiquitin protein ligase binding,GO:0034450~ubiquitin-ubiquitin ligase activity,	hsa04120:Ubiquitin mediated proteolysis,
O14933	UBE2L6	0.000100547	GO:0006464~cellular protein modification process,GO:0016567~protein ubiquitination,GO:0019941~modification-dependent protein catabolic process,GO:0019985~translesion synthesis,GO:0032020~ISG15-protein conjugation,GO:0032480~negative regulation of type I interferon production,GO:0044267~cellular protein metabolic process,	GO:0005654~nucleoplasm,GO:0005829~cytosol,	GO:0004842~ubiquitin-protein transferase activity,GO:0005515~protein binding,GO:0005524~ATP binding,GO:0042296~ISG15 transferase activity,GO:0043130~ubiquitin binding,	hsa04120:Ubiquitin mediated proteolysis,hsa05012:Parkinson's disease,
P61081	UBE2M	0.00282001	GO:0006464~cellular protein modification process,GO:0007179~transforming growth factor beta receptor signaling pathway,GO:0016567~protein ubiquitination,GO:0038061~NIK/NF-kappaB signaling,GO:0043525~positive regulation of neuron apoptotic process,GO:0045116~protein neddylation,	GO:0005737~cytoplasm,GO:0005829~cytosol,GO:0070062~extracellular exosome,	GO:0004842~ubiquitin-protein transferase activity,GO:0005515~protein binding,GO:0005524~ATP binding,GO:0018169~ribosomal S6-glutamic acid ligase activity,GO:0019788~NEDD8 transferase activity,GO:0031625~ubiquitin protein ligase binding,GO:0061630~ubiquitin protein ligase activity,	hsa04120:Ubiquitin mediated proteolysis,
P11441	UBL4A	0.0123487	GO:0006464~cellular protein modification process,GO:0006810~transport,GO:0071816~tail-anchored membrane protein insertion into ER membrane,	GO:0005634~nucleus,GO:0005737~cytoplasm,GO:0005829~cytosol,GO:0016020~membrane,GO:0071818~BAT3 complex,	GO:0005515~protein binding,GO:0019787~ubiquitin-like protein transferase activity,GO:0051087~chaperone binding,
P14927	UQCRB	0.00222678	GO:0006119~oxidative phosphorylation,GO:0006122~mitochondrial electron transport, ubiquinol to cytochrome c,GO:0009060~aerobic respiration,GO:0034551~mitochondrial respiratory chain complex III assembly,GO:0055114~oxidation-reduction process,GO:1902600~hydrogen ion transmembrane transport,	GO:0005743~mitochondrial inner membrane,GO:0005746~mitochondrial respiratory chain,GO:0005750~mitochondrial respiratory chain complex III,	GO:0005515~protein binding,GO:0008121~ubiquinol-cytochrome-c reductase activity,	hsa00190:Oxidative phosphorylation,hsa01100:Metabolic pathways,hsa04260:Cardiac muscle contraction,hsa04932:Non-alcoholic fatty liver disease (NAFLD),hsa05010:Alzheimer's disease,hsa05012:Parkinson's disease,hsa05016:Huntington's disease,
P31930	UQCRC1	0.000749222	GO:0006119~oxidative phosphorylation,GO:0006122~mitochondrial electron transport, ubiquinol to cytochrome c,GO:0009060~aerobic respiration,GO:0014823~response to activity,GO:0016485~protein processing,GO:0043279~response to alkaloid,GO:0055114~oxidation-reduction process,GO:1902600~hydrogen ion transmembrane transport,	GO:0005739~mitochondrion,GO:0005743~mitochondrial inner membrane,GO:0005746~mitochondrial respiratory chain,GO:0005750~mitochondrial respiratory chain complex III,GO:0043209~myelin sheath,	GO:0004222~metalloendopeptidase activity,GO:0008121~ubiquinol-cytochrome-c reductase activity,GO:0008270~zinc ion binding,GO:0031625~ubiquitin protein ligase binding,GO:0032403~protein complex binding,	hsa00190:Oxidative phosphorylation,hsa01100:Metabolic pathways,hsa04260:Cardiac muscle contraction,hsa04932:Non-alcoholic fatty liver disease (NAFLD),hsa05010:Alzheimer's disease,hsa05012:Parkinson's disease,hsa05016:Huntington's disease,
P22695	UQCRC2	0.00677369	GO:0006119~oxidative phosphorylation,GO:0006122~mitochondrial electron transport, ubiquinol to cytochrome c,GO:0009060~aerobic respiration,GO:0016485~protein processing,	GO:0005654~nucleoplasm,GO:0005739~mitochondrion,GO:0005743~mitochondrial inner membrane,GO:0005750~mitochondrial respiratory chain complex III,GO:0043209~myelin sheath,GO:0070062~extracellular exosome,	GO:0004222~metalloendopeptidase activity,GO:0005515~protein binding,GO:0008270~zinc ion binding,GO:0032403~protein complex binding,GO:0046872~metal ion binding,	hsa00190:Oxidative phosphorylation,hsa01100:Metabolic pathways,hsa04260:Cardiac muscle contraction,hsa04932:Non-alcoholic fatty liver disease (NAFLD),hsa05010:Alzheimer's disease,hsa05012:Parkinson's disease,hsa05016:Huntington's disease,
O14949	UQCRQ	0.00612896	GO:0006122~mitochondrial electron transport, ubiquinol to cytochrome c,GO:0021539~subthalamus development,GO:0021548~pons development,GO:0021680~cerebellar Purkinje cell layer development,GO:0021766~hippocampus development,GO:0021794~thalamus development,GO:0021854~hypothalamus development,GO:0021860~pyramidal neuron development,GO:0030901~midbrain development,GO:1902600~hydrogen ion transmembran…	GO:0005739~mitochondrion,GO:0005743~mitochondrial inner membrane,GO:0005750~mitochondrial respiratory chain complex III,GO:0070469~respiratory chain,	GO:0008121~ubiquinol-cytochrome-c reductase activity,	hsa00190:Oxidative phosphorylation,hsa01100:Metabolic pathways,hsa04260:Cardiac muscle contraction,hsa04932:Non-alcoholic fatty liver disease (NAFLD),hsa05010:Alzheimer's disease,hsa05012:Parkinson's disease,hsa05016:Huntington's disease,
Q9P253	VPS18	0.0539249	GO:0006886~intracellular protein transport,GO:0006904~vesicle docking involved in exocytosis,GO:0006914~autophagy,GO:0007032~endosome organization,GO:0007040~lysosome organization,GO:0008333~endosome to lysosome transport,GO:0016192~vesicle-mediated transport,GO:0035542~regulation of SNARE complex assembly,GO:0046718~viral entry into host cell,	GO:0005764~lysosome,GO:0005765~lysosomal membrane,GO:0005769~early endosome,GO:0005770~late endosome,GO:0005776~autophagosome,GO:0005884~actin filament,GO:0030123~AP-3 adaptor complex,GO:0030136~clathrin-coated vesicle,GO:0030897~HOPS complex,GO:0031902~late endosome membrane,GO:0033263~CORVET complex,	GO:0003779~actin binding,GO:0005515~protein binding,GO:0019905~syntaxin binding,GO:0030674~protein binding, bridging,GO:0046872~metal ion binding,
O75436	VPS26A	0.00205995	GO:0006886~intracellular protein transport,GO:0016055~Wnt signaling pathway,GO:0016241~regulation of macroautophagy,GO:0042147~retrograde transport, endosome to Golgi,GO:1990126~retrograde transport, endosome to plasma membrane,	GO:0005768~endosome,GO:0005769~early endosome,GO:0005829~cytosol,GO:0010008~endosome membrane,GO:0030904~retromer complex,GO:0030906~retromer, cargo-selective complex,GO:0031982~vesicle,GO:0043231~intracellular membrane-bounded organelle,GO:0070062~extracellular exosome,GO:0097422~tubular endosome,	GO:0005515~protein binding,GO:0008565~protein transporter activity,	hsa04144:Endocytosis,
Q9UBQ0	VPS29	0.0432912	GO:0006886~intracellular protein transport,GO:0015031~protein transport,GO:0016055~Wnt signaling pathway,GO:0042147~retrograde transport, endosome to Golgi,GO:1990126~retrograde transport, endosome to plasma membrane,	GO:0005737~cytoplasm,GO:0005768~endosome,GO:0005769~early endosome,GO:0005770~late endosome,GO:0005829~cytosol,GO:0010008~endosome membrane,GO:0030904~retromer complex,GO:0030906~retromer, cargo-selective complex,GO:0043231~intracellular membrane-bounded organelle,GO:0070062~extracellular exosome,	GO:0005515~protein binding,GO:0008565~protein transporter activity,GO:0046872~metal ion binding,	hsa04144:Endocytosis,
F5H008	VPS33B	0.482748	GO:0006904~vesicle docking involved in exocytosis,GO:0007032~endosome organization,GO:0008333~endosome to lysosome transport,GO:0015031~protein transport,GO:0016192~vesicle-mediated transport,GO:0032400~melanosome localization,GO:0032418~lysosome localization,GO:0035855~megakaryocyte development,GO:0061025~membrane fusion,GO:0070889~platelet alpha granule organization,GO:0090330~regulation of pla…	GO:0005737~cytoplasm,GO:0005764~lysosome,GO:0005765~lysosomal membrane,GO:0005770~late endosome,GO:0030123~AP-3 adaptor complex,GO:0030136~clathrin-coated vesicle,GO:0030897~HOPS complex,GO:0031091~platelet alpha granule,GO:0031901~early endosome membrane,GO:0031902~late endosome membrane,GO:0048471~perinuclear region of cytoplasm,GO:0055037~recycling endosome,GO:0071439~clathrin complex,	GO:0005515~protein binding,
Q96QK1	VPS35	0.000263073	GO:0006886~intracellular protein transport,GO:0010628~positive regulation of gene expression,GO:0010821~regulation of mitochondrion organization,GO:0016055~Wnt signaling pathway,GO:0016241~regulation of macroautophagy,GO:0031647~regulation of protein stability,GO:0032268~regulation of cellular protein metabolic process,GO:0042147~retrograde transport, endosome to Golgi,GO:0043653~mitochondrial fr…	GO:0005739~mitochondrion,GO:0005765~lysosomal membrane,GO:0005768~endosome,GO:0005769~early endosome,GO:0005770~late endosome,GO:0005829~cytosol,GO:0010008~endosome membrane,GO:0014069~postsynaptic density,GO:0030904~retromer complex,GO:0030906~retromer, cargo-selective complex,GO:0070062~extracellular exosome,GO:0097422~tubular endosome,	GO:0005515~protein binding,GO:0008565~protein transporter activity,GO:0031748~D1 dopamine receptor binding,	hsa04144:Endocytosis,
Q9H9H4	VPS37B	0.00413235	GO:0006914~autophagy,GO:0015031~protein transport,GO:0016197~endosomal transport,GO:0019058~viral life cycle,GO:0036258~multivesicular body assembly,GO:0039702~viral budding via host ESCRT complex,GO:0075733~intracellular transport of virus,GO:1902188~positive regulation of viral release from host cell,GO:1903774~positive regulation of viral budding via host ESCRT complex,	GO:0000813~ESCRT I complex,GO:0005737~cytoplasm,GO:0005768~endosome,GO:0005886~plasma membrane,GO:0010008~endosome membrane,GO:0030496~midbody,GO:0031902~late endosome membrane,GO:0070062~extracellular exosome,	GO:0005515~protein binding,GO:0048306~calcium-dependent protein binding,	hsa04144:Endocytosis,
A0A087WY55	VTA1	0.0915843	GO:0006914~autophagy,GO:0015031~protein transport,GO:0016197~endosomal transport,GO:0019058~viral life cycle,GO:0036258~multivesicular body assembly,GO:0046755~viral budding,GO:0071985~multivesicular body sorting pathway,GO:1904903~ESCRT III complex disassembly,	GO:0005829~cytosol,GO:0010008~endosome membrane,GO:0070062~extracellular exosome,	GO:0005515~protein binding,GO:0008022~protein C-terminus binding,	hsa04144:Endocytosis,
Q9UGM6	WARS2	0.317938	GO:0001570~vasculogenesis,GO:0006418~tRNA aminoacylation for protein translation,GO:0006436~tryptophanyl-tRNA aminoacylation,	GO:0005737~cytoplasm,GO:0005759~mitochondrial matrix,	GO:0004830~tryptophan-tRNA ligase activity,GO:0005524~ATP binding,	hsa00970:Aminoacyl-tRNA biosynthesis,
O76024	WFS1	0.921727	GO:0000122~negative regulation of transcription from RNA polymerase II promoter,GO:0001822~kidney development,GO:0003091~renal water homeostasis,GO:0006983~ER overload response,GO:0007601~visual perception,GO:0007605~sensory perception of sound,GO:0022417~protein maturation by protein folding,GO:0030433~ER-associated ubiquitin-dependent protein catabolic process,GO:0030968~endoplasmic reticulum u…	GO:0000502~proteasome complex,GO:0005783~endoplasmic reticulum,GO:0005789~endoplasmic reticulum membrane,GO:0016021~integral component of membrane,GO:0030176~integral component of endoplasmic reticulum membrane,GO:0030425~dendrite,	GO:0005515~protein binding,GO:0005516~calmodulin binding,GO:0031625~ubiquitin protein ligase binding,GO:0033613~activating transcription factor binding,GO:0048306~calcium-dependent protein binding,GO:0051117~ATPase binding,	hsa04141:Protein processing in endoplasmic reticulum,
F5GWT4	WNK1	0.0706774	GO:0002028~regulation of sodium ion transport,GO:0003084~positive regulation of systemic arterial blood pressure,GO:0006468~protein phosphorylation,GO:0006811~ion transport,GO:0010766~negative regulation of sodium ion transport,GO:0010923~negative regulation of phosphatase activity,GO:0018107~peptidyl-threonine phosphorylation,GO:0023016~signal transduction by trans-phosphorylation,GO:0032147~act…	GO:0005737~cytoplasm,GO:0005829~cytosol,GO:0016020~membrane,	GO:0000287~magnesium ion binding,GO:0004672~protein kinase activity,GO:0004674~protein serine/threonine kinase activity,GO:0005515~protein binding,GO:0005524~ATP binding,GO:0016301~kinase activity,GO:0019869~chloride channel inhibitor activity,GO:0019870~potassium channel inhibitor activity,GO:0019901~protein kinase binding,GO:0019902~phosphatase binding,GO:0030291~protein serine/threonine kinase…
Q5T6H7	XPNPEP1	0.00123793	GO:0006508~proteolysis,GO:0010815~bradykinin catabolic process,	GO:0005737~cytoplasm,GO:0070062~extracellular exosome,	GO:0004177~aminopeptidase activity,GO:0016787~hydrolase activity,GO:0030145~manganese ion binding,GO:0042803~protein homodimerization activity,GO:0046872~metal ion binding,GO:0070006~metalloaminopeptidase activity,
P04217	A1BG	0.00357701	GO:0002576~platelet degranulation,	GO:0005576~extracellular region,GO:0005615~extracellular space,GO:0031093~platelet alpha granule lumen,GO:0070062~extracellular exosome,GO:0072562~blood microparticle,
P01023	A2M	0.00159989	GO:0001869~negative regulation of complement activation, lectin pathway,GO:0002576~platelet degranulation,GO:0007597~blood coagulation, intrinsic pathway,GO:0010951~negative regulation of endopeptidase activity,GO:0022617~extracellular matrix disassembly,GO:0043547~positive regulation of GTPase activity,GO:0048863~stem cell differentiation,GO:0051056~regulation of small GTPase mediated signal tra…	GO:0005576~extracellular region,GO:0005829~cytosol,GO:0031093~platelet alpha granule lumen,GO:0070062~extracellular exosome,GO:0072562~blood microparticle,	GO:0002020~protease binding,GO:0004866~endopeptidase inhibitor activity,GO:0004867~serine-type endopeptidase inhibitor activity,GO:0005096~GTPase activator activity,GO:0005102~receptor binding,GO:0005515~protein binding,GO:0019838~growth factor binding,GO:0019899~enzyme binding,GO:0019959~interleukin-8 binding,GO:0019966~interleukin-1 binding,GO:0043120~tumor necrosis factor binding,GO:0048306~ca…	hsa04610:Complement and coagulation cascades,
P62736	ACTA2	2.84993e-05	GO:0006936~muscle contraction,GO:0008217~regulation of blood pressure,GO:0009615~response to virus,GO:0010628~positive regulation of gene expression,GO:0014829~vascular smooth muscle contraction,GO:0072144~glomerular mesangial cell development,GO:0090131~mesenchyme migration,	GO:0005615~extracellular space,GO:0005737~cytoplasm,GO:0005829~cytosol,GO:0015629~actin cytoskeleton,GO:0030027~lamellipodium,GO:0030175~filopodium,GO:0030485~smooth muscle contractile fiber,GO:0043234~protein complex,GO:0044297~cell body,GO:0070062~extracellular exosome,	GO:0005524~ATP binding,GO:0019901~protein kinase binding,	hsa04270:Vascular smooth muscle contraction,
Q15848	ADIPOQ	0.000415879	GO:0001666~response to hypoxia,GO:0001934~positive regulation of protein phosphorylation,GO:0006006~glucose metabolic process,GO:0006091~generation of precursor metabolites and energy,GO:0006635~fatty acid beta-oxidation,GO:0007584~response to nutrient,GO:0007623~circadian rhythm,GO:0009744~response to sucrose,GO:0009749~response to glucose,GO:0009967~positive regulation of signal transduction,GO…	GO:0005576~extracellular region,GO:0005581~collagen trimer,GO:0005615~extracellular space,GO:0005783~endoplasmic reticulum,GO:0009986~cell surface,GO:0070062~extracellular exosome,	GO:0005102~receptor binding,GO:0005125~cytokine activity,GO:0005179~hormone activity,GO:0005515~protein binding,GO:0033691~sialic acid binding,GO:0042802~identical protein binding,GO:0042803~protein homodimerization activity,	hsa03320:PPAR signaling pathway,hsa04152:AMPK signaling pathway,hsa04920:Adipocytokine signaling pathway,hsa04930:Type II diabetes mellitus,hsa04932:Non-alcoholic fatty liver disease (NAFLD),
Q9BRR6	ADPGK	0.00238132	GO:0005975~carbohydrate metabolic process,GO:0006006~glucose metabolic process,GO:0006096~glycolytic process,	GO:0005576~extracellular region,GO:0005783~endoplasmic reticulum,GO:0016020~membrane,GO:0016021~integral component of membrane,	GO:0016301~kinase activity,GO:0016773~phosphotransferase activity, alcohol group as acceptor,GO:0043843~ADP-specific glucokinase activity,GO:0046872~metal ion binding,	hsa00010:Glycolysis / Gluconeogenesis,hsa01100:Metabolic pathways,hsa01130:Biosynthesis of antibiotics,hsa01200:Carbon metabolism,
P43652	AFM	0.00471554	GO:0051180~vitamin transport,	GO:0005576~extracellular region,GO:0005615~extracellular space,GO:0070062~extracellular exosome,GO:0072562~blood microparticle,	GO:0008431~vitamin E binding,
O95994	AGR2	0.000224426	GO:0010628~positive regulation of gene expression,GO:0010811~positive regulation of cell-substrate adhesion,GO:0030154~cell differentiation,GO:0034976~response to endoplasmic reticulum stress,GO:0045742~positive regulation of epidermal growth factor receptor signaling pathway,GO:0048546~digestive tract morphogenesis,GO:0048639~positive regulation of developmental growth,GO:0060480~lung goblet cel…	GO:0005615~extracellular space,GO:0005739~mitochondrion,GO:0005783~endoplasmic reticulum,	GO:0002162~dystroglycan binding,GO:0005154~epidermal growth factor receptor binding,GO:0005515~protein binding,GO:0042803~protein homodimerization activity,
P01019	AGT	0.0165354	GO:0001558~regulation of cell growth,GO:0001819~positive regulation of cytokine production,GO:0001822~kidney development,GO:0001974~blood vessel remodeling,GO:0002003~angiotensin maturation,GO:0002016~regulation of blood volume by renin-angiotensin,GO:0002018~renin-angiotensin regulation of aldosterone production,GO:0002019~regulation of renal output by angiotensin,GO:0002027~regulation of heart …	GO:0005576~extracellular region,GO:0005615~extracellular space,GO:0005737~cytoplasm,GO:0070062~extracellular exosome,GO:0072562~blood microparticle,	GO:0004867~serine-type endopeptidase inhibitor activity,GO:0005179~hormone activity,GO:0005515~protein binding,GO:0008083~growth factor activity,GO:0016176~superoxide-generating NADPH oxidase activator activity,GO:0017080~sodium channel regulator activity,GO:0031702~type 1 angiotensin receptor binding,GO:0031703~type 2 angiotensin receptor binding,GO:0048018~receptor agonist activity,	hsa04614:Renin-angiotensin system,hsa04924:Renin secretion,
P02765	AHSG	0.0113731	GO:0001501~skeletal system development,GO:0001503~ossification,GO:0002576~platelet degranulation,GO:0006907~pinocytosis,GO:0006953~acute-phase response,GO:0010951~negative regulation of endopeptidase activity,GO:0030500~regulation of bone mineralization,GO:0030502~negative regulation of bone mineralization,GO:0042326~negative regulation of phosphorylation,GO:0046627~negative regulation of insulin…	GO:0005576~extracellular region,GO:0005615~extracellular space,GO:0031012~extracellular matrix,GO:0031093~platelet alpha granule lumen,GO:0070062~extracellular exosome,GO:0072562~blood microparticle,	GO:0004866~endopeptidase inhibitor activity,GO:0004869~cysteine-type endopeptidase inhibitor activity,GO:0019210~kinase inhibitor activity,
P14550	AKR1A1	0.0554781	GO:0006006~glucose metabolic process,GO:0006081~cellular aldehyde metabolic process,GO:0019640~glucuronate catabolic process to xylulose 5-phosphate,GO:0019853~L-ascorbic acid biosynthetic process,GO:0042840~D-glucuronate catabolic process,GO:0046185~aldehyde catabolic process,GO:0055114~oxidation-reduction process,GO:1901687~glutathione derivative biosynthetic process,	GO:0005615~extracellular space,GO:0005829~cytosol,GO:0016324~apical plasma membrane,GO:0070062~extracellular exosome,	GO:0004032~alditol:NADP+ 1-oxidoreductase activity,GO:0004033~aldo-keto reductase (NADP) activity,GO:0005515~protein binding,GO:0009055~electron carrier activity,GO:0016491~oxidoreductase activity,GO:0047939~L-glucuronate reductase activity,	hsa00010:Glycolysis / Gluconeogenesis,hsa00040:Pentose and glucuronate interconversions,hsa00561:Glycerolipid metabolism,hsa01100:Metabolic pathways,hsa01130:Biosynthesis of antibiotics,hsa01220:Degradation of aromatic compounds,
C9JMC5	ALDH3A1	3.74886e-05	GO:0001666~response to hypoxia,GO:0006081~cellular aldehyde metabolic process,GO:0006805~xenobiotic metabolic process,GO:0007568~aging,GO:0007584~response to nutrient,GO:0008284~positive regulation of cell proliferation,GO:0042493~response to drug,GO:0051384~response to glucocorticoid,GO:0051591~response to cAMP,GO:0055114~oxidation-reduction process,	GO:0005615~extracellular space,GO:0005654~nucleoplasm,GO:0005737~cytoplasm,GO:0005783~endoplasmic reticulum,GO:0005829~cytosol,GO:0005886~plasma membrane,GO:0016021~integral component of membrane,GO:0043231~intracellular membrane-bounded organelle,	GO:0004028~3-chloroallyl aldehyde dehydrogenase activity,GO:0004029~aldehyde dehydrogenase (NAD) activity,GO:0004030~aldehyde dehydrogenase [NAD(P)+] activity,GO:0005515~protein binding,GO:0008106~alcohol dehydrogenase (NADP+) activity,GO:0016491~oxidoreductase activity,GO:0016620~oxidoreductase activity, acting on the aldehyde or oxo group of donors, NAD or NADP as acceptor,GO:0018479~benzaldehy…	hsa00010:Glycolysis / Gluconeogenesis,hsa00340:Histidine metabolism,hsa00350:Tyrosine metabolism,hsa00360:Phenylalanine metabolism,hsa00410:beta-Alanine metabolism,hsa00980:Metabolism of xenobiotics by cytochrome P450,hsa00982:Drug metabolism - cytochrome P450,hsa01100:Metabolic pathways,hsa05204:Chemical carcinogenesis,
P05186	ALPL	0.00014263	GO:0001501~skeletal system development,GO:0001649~osteoblast differentiation,GO:0001958~endochondral ossification,GO:0003006~developmental process involved in reproduction,GO:0016311~dephosphorylation,GO:0032496~response to lipopolysaccharide,GO:0033280~response to vitamin D,GO:0046677~response to antibiotic,GO:0051384~response to glucocorticoid,GO:0071407~cellular response to organic cyclic comp…	GO:0005578~proteinaceous extracellular matrix,GO:0005615~extracellular space,GO:0005886~plasma membrane,GO:0016020~membrane,GO:0016021~integral component of membrane,GO:0031225~anchored component of membrane,GO:0065010~extracellular membrane-bounded organelle,GO:0070062~extracellular exosome,	GO:0004035~alkaline phosphatase activity,GO:0005515~protein binding,GO:0016462~pyrophosphatase activity,GO:0016791~phosphatase activity,GO:0046872~metal ion binding,	hsa00790:Folate biosynthesis,hsa01100:Metabolic pathways,
P02760	AMBP	0.00258425	GO:0006898~receptor-mediated endocytosis,GO:0007155~cell adhesion,GO:0007565~female pregnancy,GO:0010951~negative regulation of endopeptidase activity,GO:0016032~viral process,GO:0018298~protein-chromophore linkage,GO:0030163~protein catabolic process,GO:0042167~heme catabolic process,GO:0046329~negative regulation of JNK cascade,GO:0050777~negative regulation of immune response,	GO:0005576~extracellular region,GO:0005615~extracellular space,GO:0005886~plasma membrane,GO:0009986~cell surface,GO:0043231~intracellular membrane-bounded organelle,GO:0070062~extracellular exosome,GO:0072562~blood microparticle,	GO:0004867~serine-type endopeptidase inhibitor activity,GO:0005515~protein binding,GO:0019855~calcium channel inhibitor activity,GO:0019862~IgA binding,GO:0020037~heme binding,GO:0036094~small molecule binding,GO:0042803~protein homodimerization activity,GO:0046904~calcium oxalate binding,
V9GYG9	APOA2	0.042582	GO:0001523~retinoid metabolic process,GO:0002526~acute inflammatory response,GO:0002740~negative regulation of cytokine secretion involved in immune response,GO:0006641~triglyceride metabolic process,GO:0006656~phosphatidylcholine biosynthetic process,GO:0006869~lipid transport,GO:0008203~cholesterol metabolic process,GO:0009395~phospholipid catabolic process,GO:0009749~response to glucose,GO:001…	GO:0005576~extracellular region,GO:0005769~early endosome,GO:0005788~endoplasmic reticulum lumen,GO:0005829~cytosol,GO:0034361~very-low-density lipoprotein particle,GO:0034364~high-density lipoprotein particle,GO:0034366~spherical high-density lipoprotein particle,GO:0042627~chylomicron,GO:0070062~extracellular exosome,GO:0072562~blood microparticle,	GO:0005319~lipid transporter activity,GO:0005515~protein binding,GO:0005543~phospholipid binding,GO:0008035~high-density lipoprotein particle binding,GO:0008289~lipid binding,GO:0015485~cholesterol binding,GO:0017127~cholesterol transporter activity,GO:0031210~phosphatidylcholine binding,GO:0034190~apolipoprotein receptor binding,GO:0042803~protein homodimerization activity,GO:0046982~protein het…	hsa03320:PPAR signaling pathway,
P06727	APOA4	0.017147	GO:0001523~retinoid metabolic process,GO:0002227~innate immune response in mucosa,GO:0006695~cholesterol biosynthetic process,GO:0006869~lipid transport,GO:0006982~response to lipid hydroperoxide,GO:0007159~leukocyte cell-cell adhesion,GO:0008203~cholesterol metabolic process,GO:0010873~positive regulation of cholesterol esterification,GO:0010898~positive regulation of triglyceride catabolic proc…	GO:0005576~extracellular region,GO:0005615~extracellular space,GO:0005769~early endosome,GO:0005788~endoplasmic reticulum lumen,GO:0005829~cytosol,GO:0009986~cell surface,GO:0034361~very-low-density lipoprotein particle,GO:0034364~high-density lipoprotein particle,GO:0042627~chylomicron,GO:0070062~extracellular exosome,GO:0072562~blood microparticle,	GO:0005319~lipid transporter activity,GO:0005507~copper ion binding,GO:0005515~protein binding,GO:0008289~lipid binding,GO:0015485~cholesterol binding,GO:0016209~antioxidant activity,GO:0017127~cholesterol transporter activity,GO:0031210~phosphatidylcholine binding,GO:0042803~protein homodimerization activity,GO:0060228~phosphatidylcholine-sterol O-acyltransferase activator activity,	hsa04975:Fat digestion and absorption,hsa04977:Vitamin digestion and absorption,
P04114	APOB	0.00461333	GO:0001523~retinoid metabolic process,GO:0001701~in utero embryonic development,GO:0006642~triglyceride mobilization,GO:0006898~receptor-mediated endocytosis,GO:0007283~spermatogenesis,GO:0007399~nervous system development,GO:0008203~cholesterol metabolic process,GO:0009566~fertilization,GO:0009615~response to virus,GO:0009743~response to carbohydrate,GO:0009791~post-embryonic development,GO:0010…	GO:0005576~extracellular region,GO:0005615~extracellular space,GO:0005737~cytoplasm,GO:0005769~early endosome,GO:0005788~endoplasmic reticulum lumen,GO:0005789~endoplasmic reticulum membrane,GO:0005794~Golgi apparatus,GO:0005829~cytosol,GO:0005886~plasma membrane,GO:0010008~endosome membrane,GO:0015629~actin cytoskeleton,GO:0030669~clathrin-coated endocytic vesicle membrane,GO:0031904~endosome lu…	GO:0005319~lipid transporter activity,GO:0005515~protein binding,GO:0005543~phospholipid binding,GO:0008201~heparin binding,GO:0017127~cholesterol transporter activity,GO:0035473~lipase binding,GO:0050750~low-density lipoprotein particle receptor binding,	hsa04975:Fat digestion and absorption,hsa04977:Vitamin digestion and absorption,
K7ERI9	APOC1	0.00630216	GO:0006629~lipid metabolic process,GO:0006641~triglyceride metabolic process,GO:0008203~cholesterol metabolic process,GO:0010873~positive regulation of cholesterol esterification,GO:0010900~negative regulation of phosphatidylcholine catabolic process,GO:0010916~negative regulation of very-low-density lipoprotein particle clearance,GO:0032374~regulation of cholesterol transport,GO:0032375~negative…	GO:0005576~extracellular region,GO:0005783~endoplasmic reticulum,GO:0034361~very-low-density lipoprotein particle,GO:0034364~high-density lipoprotein particle,GO:0042627~chylomicron,GO:0070062~extracellular exosome,	GO:0004859~phospholipase inhibitor activity,GO:0005504~fatty acid binding,GO:0031210~phosphatidylcholine binding,GO:0055102~lipase inhibitor activity,GO:0060228~phosphatidylcholine-sterol O-acyltransferase activator activity,
P02656	APOC3	0.00132997	GO:0001523~retinoid metabolic process,GO:0006641~triglyceride metabolic process,GO:0006869~lipid transport,GO:0007186~G-protein coupled receptor signaling pathway,GO:0010897~negative regulation of triglyceride catabolic process,GO:0010903~negative regulation of very-low-density lipoprotein particle remodeling,GO:0010916~negative regulation of very-low-density lipoprotein particle clearance,GO:001…	GO:0005576~extracellular region,GO:0005615~extracellular space,GO:0005769~early endosome,GO:0034361~very-low-density lipoprotein particle,GO:0034363~intermediate-density lipoprotein particle,GO:0034366~spherical high-density lipoprotein particle,GO:0042627~chylomicron,GO:0070062~extracellular exosome,	GO:0005543~phospholipid binding,GO:0008289~lipid binding,GO:0015485~cholesterol binding,GO:0030234~enzyme regulator activity,GO:0055102~lipase inhibitor activity,GO:0070653~high-density lipoprotein particle receptor binding,	hsa03320:PPAR signaling pathway,
P05090	APOD	5.70687e-05	GO:0000302~response to reactive oxygen species,GO:0001525~angiogenesis,GO:0006006~glucose metabolic process,GO:0006629~lipid metabolic process,GO:0006869~lipid transport,GO:0007420~brain development,GO:0007568~aging,GO:0010642~negative regulation of platelet-derived growth factor receptor signaling pathway,GO:0014012~peripheral nervous system axon regeneration,GO:0042246~tissue regeneration,GO:00…	GO:0005576~extracellular region,GO:0005615~extracellular space,GO:0005783~endoplasmic reticulum,GO:0022626~cytosolic ribosome,GO:0030425~dendrite,GO:0043025~neuronal cell body,GO:0048471~perinuclear region of cytoplasm,GO:0070062~extracellular exosome,	GO:0005215~transporter activity,GO:0005319~lipid transporter activity,GO:0005515~protein binding,GO:0008289~lipid binding,GO:0015485~cholesterol binding,GO:0036094~small molecule binding,
P02749	APOH	0.000120525	GO:0001937~negative regulation of endothelial cell proliferation,GO:0002576~platelet degranulation,GO:0006641~triglyceride metabolic process,GO:0007597~blood coagulation, intrinsic pathway,GO:0010596~negative regulation of endothelial cell migration,GO:0016525~negative regulation of angiogenesis,GO:0030194~positive regulation of blood coagulation,GO:0030195~negative regulation of blood coagulatio…	GO:0005576~extracellular region,GO:0005615~extracellular space,GO:0009986~cell surface,GO:0031012~extracellular matrix,GO:0031089~platelet dense granule lumen,GO:0034361~very-low-density lipoprotein particle,GO:0034364~high-density lipoprotein particle,GO:0042627~chylomicron,GO:0070062~extracellular exosome,	GO:0001948~glycoprotein binding,GO:0005515~protein binding,GO:0005543~phospholipid binding,GO:0008201~heparin binding,GO:0008289~lipid binding,GO:0042802~identical protein binding,GO:0060230~lipoprotein lipase activator activity,
Q9BQE5	APOL2	0.760574	GO:0006629~lipid metabolic process,GO:0006869~lipid transport,GO:0006953~acute-phase response,GO:0007275~multicellular organism development,GO:0008203~cholesterol metabolic process,GO:0042157~lipoprotein metabolic process,GO:0060135~maternal process involved in female pregnancy,	GO:0005576~extracellular region,GO:0005789~endoplasmic reticulum membrane,GO:0016020~membrane,GO:0016021~integral component of membrane,	GO:0005102~receptor binding,GO:0008035~high-density lipoprotein particle binding,GO:0008289~lipid binding,
P15289	ARSA	0.00102653	GO:0006687~glycosphingolipid metabolic process,GO:0006914~autophagy,GO:0007339~binding of sperm to zona pellucida,GO:0007417~central nervous system development,GO:0007584~response to nutrient,GO:0008152~metabolic process,GO:0009268~response to pH,GO:0043627~response to estrogen,GO:0043687~post-translational protein modification,GO:0045471~response to ethanol,GO:0051597~response to methylmercury,	GO:0001669~acrosomal vesicle,GO:0005615~extracellular space,GO:0005764~lysosome,GO:0005768~endosome,GO:0005788~endoplasmic reticulum lumen,GO:0016021~integral component of membrane,GO:0031232~extrinsic component of external side of plasma membrane,GO:0043202~lysosomal lumen,GO:0070062~extracellular exosome,	GO:0003824~catalytic activity,GO:0004065~arylsulfatase activity,GO:0004098~cerebroside-sulfatase activity,GO:0005509~calcium ion binding,GO:0005515~protein binding,GO:0008484~sulfuric ester hydrolase activity,	hsa00600:Sphingolipid metabolism,hsa04142:Lysosome,
Q9BXN1	ASPN	3.91317e-07	GO:0006469~negative regulation of protein kinase activity,GO:0019221~cytokine-mediated signaling pathway,GO:0030282~bone mineralization,GO:0030512~negative regulation of transforming growth factor beta receptor signaling pathway,GO:0046426~negative regulation of JAK-STAT cascade,GO:0070171~negative regulation of tooth mineralization,	GO:0005578~proteinaceous extracellular matrix,GO:0005737~cytoplasm,GO:0031012~extracellular matrix,	GO:0004860~protein kinase inhibitor activity,GO:0005509~calcium ion binding,GO:0005518~collagen binding,
A0A1W2PQD2	ATXN10	0.000240263	GO:0007399~nervous system development,GO:0031175~neuron projection development,GO:0042384~cilium assembly,GO:0070207~protein homotrimerization,	GO:0005615~extracellular space,GO:0005737~cytoplasm,GO:0005829~cytosol,GO:0005886~plasma membrane,GO:0016020~membrane,GO:0030425~dendrite,GO:0043025~neuronal cell body,GO:0048471~perinuclear region of cytoplasm,	GO:0005515~protein binding,GO:0019899~enzyme binding,GO:0042802~identical protein binding,
P20160	AZU1	0.058444	GO:0001774~microglial cell activation,GO:0006508~proteolysis,GO:0006954~inflammatory response,GO:0007205~protein kinase C-activating G-protein coupled receptor signaling pathway,GO:0008347~glial cell migration,GO:0010628~positive regulation of gene expression,GO:0010800~positive regulation of peptidyl-threonine phosphorylation,GO:0016485~protein processing,GO:0019730~antimicrobial humoral respons…	GO:0005576~extracellular region,GO:0005615~extracellular space,GO:0019898~extrinsic component of membrane,GO:0035577~azurophil granule membrane,GO:0042582~azurophil granule,GO:0070062~extracellular exosome,	GO:0004252~serine-type endopeptidase activity,GO:0005515~protein binding,GO:0008201~heparin binding,GO:0008233~peptidase activity,GO:0015643~toxic substance binding,GO:0043395~heparan sulfate proteoglycan binding,
H0YLF3	B2M	0.000728843	GO:0001895~retina homeostasis,GO:0001916~positive regulation of T cell mediated cytotoxicity,GO:0002474~antigen processing and presentation of peptide antigen via MHC class I,GO:0002479~antigen processing and presentation of exogenous peptide antigen via MHC class I, TAP-dependent,GO:0002480~antigen processing and presentation of exogenous peptide antigen via MHC class I, TAP-independent,GO:00024…	GO:0000139~Golgi membrane,GO:0005576~extracellular region,GO:0005615~extracellular space,GO:0005737~cytoplasm,GO:0005788~endoplasmic reticulum lumen,GO:0005794~Golgi apparatus,GO:0005886~plasma membrane,GO:0005925~focal adhesion,GO:0009897~external side of plasma membrane,GO:0012507~ER to Golgi transport vesicle membrane,GO:0016020~membrane,GO:0030670~phagocytic vesicle membrane,GO:0031901~early …	GO:0001948~glycoprotein binding,GO:0005515~protein binding,GO:0042802~identical protein binding,	hsa04612:Antigen processing and presentation,
P15291	B4GALT1	0.331017	GO:0002064~epithelial cell development,GO:0002526~acute inflammatory response,GO:0005975~carbohydrate metabolic process,GO:0005989~lactose biosynthetic process,GO:0006012~galactose metabolic process,GO:0006487~protein N-linked glycosylation,GO:0007155~cell adhesion,GO:0007339~binding of sperm to zona pellucida,GO:0007341~penetration of zona pellucida,GO:0008285~negative regulation of cell prolife…	GO:0000138~Golgi trans cisterna,GO:0000139~Golgi membrane,GO:0005615~extracellular space,GO:0005794~Golgi apparatus,GO:0005886~plasma membrane,GO:0009897~external side of plasma membrane,GO:0016020~membrane,GO:0016021~integral component of membrane,GO:0016323~basolateral plasma membrane,GO:0030057~desmosome,GO:0030112~glycocalyx,GO:0030175~filopodium,GO:0031526~brush border membrane,GO:0032580~Go…	GO:0003831~beta-N-acetylglucosaminylglycopeptide beta-1,4-galactosyltransferase activity,GO:0003945~N-acetyllactosamine synthase activity,GO:0004461~lactose synthase activity,GO:0008092~cytoskeletal protein binding,GO:0008378~galactosyltransferase activity,GO:0016757~transferase activity, transferring glycosyl groups,GO:0030145~manganese ion binding,GO:0035250~UDP-galactosyltransferase activity,G…	hsa00052:Galactose metabolism,hsa00510:N-Glycan biosynthesis,hsa00514:Other types of O-glycan biosynthesis,hsa00533:Glycosaminoglycan biosynthesis - keratan sulfate,hsa00601:Glycosphingolipid biosynthesis - lacto and neolacto series,hsa01100:Metabolic pathways,
P21810	BGN	0.0724093	GO:0001974~blood vessel remodeling,GO:0006469~negative regulation of protein kinase activity,GO:0019221~cytokine-mediated signaling pathway,GO:0019800~peptide cross-linking via chondroitin 4-sulfate glycosaminoglycan,GO:0030198~extracellular matrix organization,GO:0030203~glycosaminoglycan metabolic process,GO:0030206~chondroitin sulfate biosynthetic process,GO:0030207~chondroitin sulfate catabol…	GO:0005576~extracellular region,GO:0005578~proteinaceous extracellular matrix,GO:0005737~cytoplasm,GO:0005796~Golgi lumen,GO:0009986~cell surface,GO:0030133~transport vesicle,GO:0031012~extracellular matrix,GO:0042383~sarcolemma,GO:0043202~lysosomal lumen,GO:0070062~extracellular exosome,	GO:0004860~protein kinase inhibitor activity,GO:0005201~extracellular matrix structural constituent,GO:0005539~glycosaminoglycan binding,GO:0050840~extracellular matrix binding,
P02745	C1QA	0.0193407	GO:0006508~proteolysis,GO:0006956~complement activation,GO:0006958~complement activation, classical pathway,GO:0007267~cell-cell signaling,GO:0010039~response to iron ion,GO:0045087~innate immune response,	GO:0005576~extracellular region,GO:0005581~collagen trimer,GO:0005602~complement component C1 complex,GO:0070062~extracellular exosome,	GO:0004252~serine-type endopeptidase activity,GO:0005515~protein binding,	hsa04610:Complement and coagulation cascades,hsa05020:Prion diseases,hsa05133:Pertussis,hsa05142:Chagas disease (American trypanosomiasis),hsa05150:Staphylococcus aureus infection,hsa05322:Systemic lupus erythematosus,
A0A0A0MSV6	C1QB	0.00494364	GO:0006508~proteolysis,GO:0006956~complement activation,GO:0006958~complement activation, classical pathway,GO:0045087~innate immune response,GO:0048839~inner ear development,	GO:0005576~extracellular region,GO:0005581~collagen trimer,GO:0005602~complement component C1 complex,GO:0070062~extracellular exosome,GO:0072562~blood microparticle,	GO:0004252~serine-type endopeptidase activity,GO:0005515~protein binding,GO:0042803~protein homodimerization activity,	hsa04610:Complement and coagulation cascades,hsa05020:Prion diseases,hsa05133:Pertussis,hsa05142:Chagas disease (American trypanosomiasis),hsa05150:Staphylococcus aureus infection,hsa05322:Systemic lupus erythematosus,
P02747	C1QC	0.0222237	GO:0006508~proteolysis,GO:0006955~immune response,GO:0006956~complement activation,GO:0006958~complement activation, classical pathway,GO:0030853~negative regulation of granulocyte differentiation,GO:0045087~innate immune response,GO:0045650~negative regulation of macrophage differentiation,	GO:0005576~extracellular region,GO:0005581~collagen trimer,GO:0005615~extracellular space,GO:0070062~extracellular exosome,GO:0072562~blood microparticle,	GO:0004252~serine-type endopeptidase activity,	hsa04610:Complement and coagulation cascades,hsa05020:Prion diseases,hsa05133:Pertussis,hsa05142:Chagas disease (American trypanosomiasis),hsa05150:Staphylococcus aureus infection,hsa05322:Systemic lupus erythematosus,
B4DQI1	C2	0.0256859	GO:0006508~proteolysis,GO:0006956~complement activation,GO:0006958~complement activation, classical pathway,GO:0007584~response to nutrient,GO:0030449~regulation of complement activation,GO:0045087~innate immune response,GO:2000427~positive regulation of apoptotic cell clearance,	GO:0005576~extracellular region,GO:0005615~extracellular space,GO:0070062~extracellular exosome,	GO:0004252~serine-type endopeptidase activity,GO:0046872~metal ion binding,	hsa04610:Complement and coagulation cascades,hsa05133:Pertussis,hsa05150:Staphylococcus aureus infection,hsa05322:Systemic lupus erythematosus,
P01024	C3	0.0681993	GO:0001798~positive regulation of type IIa hypersensitivity,GO:0001934~positive regulation of protein phosphorylation,GO:0001970~positive regulation of activation of membrane attack complex,GO:0006508~proteolysis,GO:0006631~fatty acid metabolic process,GO:0006954~inflammatory response,GO:0006955~immune response,GO:0006956~complement activation,GO:0006957~complement activation, alternative pathway…	GO:0005576~extracellular region,GO:0005615~extracellular space,GO:0005886~plasma membrane,GO:0070062~extracellular exosome,GO:0072562~blood microparticle,	GO:0004252~serine-type endopeptidase activity,GO:0004866~endopeptidase inhibitor activity,GO:0005102~receptor binding,GO:0005515~protein binding,GO:0031715~C5L2 anaphylatoxin chemotactic receptor binding,	hsa04145:Phagosome,hsa04610:Complement and coagulation cascades,hsa05133:Pertussis,hsa05134:Legionellosis,hsa05140:Leishmaniasis,hsa05142:Chagas disease (American trypanosomiasis),hsa05150:Staphylococcus aureus infection,hsa05152:Tuberculosis,hsa05168:Herpes simplex infection,hsa05203:Viral carcinogenesis,hsa05322:Systemic lupus erythematosus,
A0A0G2JPR0	C4A	0.000372273	GO:0006508~proteolysis,GO:0006954~inflammatory response,GO:0006956~complement activation,GO:0006958~complement activation, classical pathway,GO:0010951~negative regulation of endopeptidase activity,GO:0030449~regulation of complement activation,GO:0045087~innate immune response,GO:2000427~positive regulation of apoptotic cell clearance,	GO:0005576~extracellular region,GO:0005615~extracellular space,GO:0005886~plasma membrane,GO:0030054~cell junction,GO:0030424~axon,GO:0030425~dendrite,GO:0043025~neuronal cell body,GO:0045202~synapse,GO:0070062~extracellular exosome,GO:0072562~blood microparticle,	GO:0001849~complement component C1q binding,GO:0004252~serine-type endopeptidase activity,GO:0004866~endopeptidase inhibitor activity,	hsa04610:Complement and coagulation cascades,hsa05133:Pertussis,hsa05150:Staphylococcus aureus infection,hsa05322:Systemic lupus erythematosus,
P04003	C4BPA	0.0573343	GO:0006958~complement activation, classical pathway,GO:0030449~regulation of complement activation,GO:0045087~innate immune response,GO:0045732~positive regulation of protein catabolic process,GO:0045959~negative regulation of complement activation, classical pathway,GO:1903027~regulation of opsonization,	GO:0005576~extracellular region,GO:0005615~extracellular space,GO:0005886~plasma membrane,GO:0044216~other organism cell,GO:0072562~blood microparticle,	GO:0005515~protein binding,GO:0044822~poly(A) RNA binding,	hsa04610:Complement and coagulation cascades,hsa05133:Pertussis,
P01031	C5	0.0112674	GO:0000187~activation of MAPK activity,GO:0001701~in utero embryonic development,GO:0006935~chemotaxis,GO:0006950~response to stress,GO:0006954~inflammatory response,GO:0006956~complement activation,GO:0006957~complement activation, alternative pathway,GO:0006958~complement activation, classical pathway,GO:0007166~cell surface receptor signaling pathway,GO:0007186~G-protein coupled receptor signa…	GO:0005576~extracellular region,GO:0005579~membrane attack complex,GO:0005615~extracellular space,GO:0070062~extracellular exosome,	GO:0004866~endopeptidase inhibitor activity,GO:0005102~receptor binding,GO:0005515~protein binding,GO:0008009~chemokine activity,	hsa04610:Complement and coagulation cascades,hsa05020:Prion diseases,hsa05133:Pertussis,hsa05150:Staphylococcus aureus infection,hsa05168:Herpes simplex infection,hsa05322:Systemic lupus erythematosus,
P13671	C6	0.0249951	GO:0001701~in utero embryonic development,GO:0001970~positive regulation of activation of membrane attack complex,GO:0006956~complement activation,GO:0006958~complement activation, classical pathway,GO:0019835~cytolysis,GO:0030449~regulation of complement activation,GO:0045087~innate immune response,GO:0045766~positive regulation of angiogenesis,	GO:0005576~extracellular region,GO:0005579~membrane attack complex,GO:0070062~extracellular exosome,	GO:0005515~protein binding,	hsa04610:Complement and coagulation cascades,hsa05020:Prion diseases,hsa05322:Systemic lupus erythematosus,
P10643	C7	0.21511	GO:0006955~immune response,GO:0006956~complement activation,GO:0006957~complement activation, alternative pathway,GO:0006958~complement activation, classical pathway,GO:0019835~cytolysis,GO:0030449~regulation of complement activation,	GO:0005576~extracellular region,GO:0005579~membrane attack complex,GO:0070062~extracellular exosome,		hsa04610:Complement and coagulation cascades,hsa05020:Prion diseases,hsa05322:Systemic lupus erythematosus,
P07357	C8A	0.00298703	GO:0006955~immune response,GO:0006956~complement activation,GO:0006957~complement activation, alternative pathway,GO:0006958~complement activation, classical pathway,GO:0019835~cytolysis,GO:0030449~regulation of complement activation,	GO:0005576~extracellular region,GO:0005579~membrane attack complex,GO:0005615~extracellular space,GO:0016020~membrane,GO:0070062~extracellular exosome,GO:0072562~blood microparticle,	GO:0001848~complement binding,GO:0032403~protein complex binding,	hsa04610:Complement and coagulation cascades,hsa05020:Prion diseases,hsa05146:Amoebiasis,hsa05322:Systemic lupus erythematosus,
F5GY80	C8B	0.0572954	GO:0006955~immune response,GO:0006956~complement activation,GO:0006957~complement activation, alternative pathway,GO:0006958~complement activation, classical pathway,GO:0019835~cytolysis,GO:0030449~regulation of complement activation,	GO:0005576~extracellular region,GO:0005579~membrane attack complex,GO:0005615~extracellular space,GO:0016020~membrane,GO:0070062~extracellular exosome,GO:1903561~extracellular vesicle,	GO:0032403~protein complex binding,	hsa04610:Complement and coagulation cascades,hsa05020:Prion diseases,hsa05146:Amoebiasis,hsa05322:Systemic lupus erythematosus,
P02748	C9	0.000556526	GO:0006955~immune response,GO:0006957~complement activation, alternative pathway,GO:0006958~complement activation, classical pathway,GO:0019836~hemolysis by symbiont of host erythrocytes,GO:0030449~regulation of complement activation,	GO:0005576~extracellular region,GO:0005579~membrane attack complex,GO:0005737~cytoplasm,GO:0005886~plasma membrane,GO:0005887~integral component of plasma membrane,GO:0016021~integral component of membrane,GO:0070062~extracellular exosome,GO:0072562~blood microparticle,		hsa04610:Complement and coagulation cascades,hsa05020:Prion diseases,hsa05146:Amoebiasis,hsa05322:Systemic lupus erythematosus,
P00918	CA2	0.00459822	GO:0001822~kidney development,GO:0002009~morphogenesis of an epithelium,GO:0006730~one-carbon metabolic process,GO:0009268~response to pH,GO:0010043~response to zinc ion,GO:0015670~carbon dioxide transport,GO:0015701~bicarbonate transport,GO:0032230~positive regulation of synaptic transmission, GABAergic,GO:0032849~positive regulation of cellular pH reduction,GO:0038166~angiotensin-activated sign…	GO:0005615~extracellular space,GO:0005737~cytoplasm,GO:0005829~cytosol,GO:0005886~plasma membrane,GO:0005902~microvillus,GO:0016323~basolateral plasma membrane,GO:0030424~axon,GO:0043209~myelin sheath,GO:0045177~apical part of cell,GO:0070062~extracellular exosome,	GO:0004064~arylesterase activity,GO:0004089~carbonate dehydratase activity,GO:0005515~protein binding,GO:0008270~zinc ion binding,	hsa00910:Nitrogen metabolism,hsa04964:Proximal tubule bicarbonate reclamation,hsa04966:Collecting duct acid secretion,hsa04971:Gastric acid secretion,hsa04972:Pancreatic secretion,hsa04976:Bile secretion,
O43852	CALU	0.0175526		GO:0005576~extracellular region,GO:0005783~endoplasmic reticulum,GO:0005789~endoplasmic reticulum membrane,GO:0005794~Golgi apparatus,GO:0016020~membrane,GO:0033018~sarcoplasmic reticulum lumen,GO:0042470~melanosome,	GO:0005509~calcium ion binding,GO:0005515~protein binding,
P49913	CAMP	0.000940896	GO:0001878~response to yeast,GO:0001934~positive regulation of protein phosphorylation,GO:0002227~innate immune response in mucosa,GO:0002544~chronic inflammatory response,GO:0008284~positive regulation of cell proliferation,GO:0019731~antibacterial humoral response,GO:0019732~antifungal humoral response,GO:0042742~defense response to bacterium,GO:0044130~negative regulation of growth of symbiont…	GO:0005576~extracellular region,GO:0005615~extracellular space,GO:0005618~cell wall,GO:0005622~intracellular,GO:0042581~specific granule,GO:0042995~cell projection,GO:0070062~extracellular exosome,		hsa04970:Salivary secretion,hsa05152:Tuberculosis,
P52907	CAPZA1	0.143127	GO:0006461~protein complex assembly,GO:0006928~movement of cell or subcellular component,GO:0007596~blood coagulation,GO:0045087~innate immune response,GO:0051016~barbed-end actin filament capping,GO:0098609~cell-cell adhesion,	GO:0005576~extracellular region,GO:0005829~cytosol,GO:0005856~cytoskeleton,GO:0005913~cell-cell adherens junction,GO:0008290~F-actin capping protein complex,GO:0015629~actin cytoskeleton,GO:0070062~extracellular exosome,GO:0071203~WASH complex,	GO:0003779~actin binding,GO:0005515~protein binding,GO:0098641~cadherin binding involved in cell-cell adhesion,	hsa04144:Endocytosis,
P47755	CAPZA2	0.895802	GO:0006461~protein complex assembly,GO:0006928~movement of cell or subcellular component,GO:0007596~blood coagulation,GO:0045087~innate immune response,GO:0051016~barbed-end actin filament capping,	GO:0005576~extracellular region,GO:0005829~cytosol,GO:0005903~brush border,GO:0008290~F-actin capping protein complex,GO:0015629~actin cytoskeleton,GO:0016020~membrane,GO:0016021~integral component of membrane,GO:0030863~cortical cytoskeleton,GO:0070062~extracellular exosome,	GO:0003779~actin binding,	hsa04144:Endocytosis,
G3V169	CASP1	0.0527266	GO:0001666~response to hypoxia,GO:0006508~proteolysis,GO:0006915~apoptotic process,GO:0006919~activation of cysteine-type endopeptidase activity involved in apoptotic process,GO:0007165~signal transduction,GO:0010506~regulation of autophagy,GO:0016485~protein processing,GO:0032496~response to lipopolysaccharide,GO:0032611~interleukin-1 beta production,GO:0033198~response to ATP,GO:0042981~regulat…	GO:0005576~extracellular region,GO:0005739~mitochondrion,GO:0005829~cytosol,GO:0072557~IPAF inflammasome complex,GO:0072558~NLRP1 inflammasome complex,GO:0072559~NLRP3 inflammasome complex,GO:0097169~AIM2 inflammasome complex,	GO:0004175~endopeptidase activity,GO:0004197~cysteine-type endopeptidase activity,GO:0005515~protein binding,GO:0008656~cysteine-type endopeptidase activator activity involved in apoptotic process,GO:0097153~cysteine-type endopeptidase activity involved in apoptotic process,	hsa04621:NOD-like receptor signaling pathway,hsa04623:Cytosolic DNA-sensing pathway,hsa05014:Amyotrophic lateral sclerosis (ALS),hsa05132:Salmonella infection,hsa05133:Pertussis,hsa05134:Legionellosis,hsa05164:Influenza A,
Q6YHK3	CD109	0.000825491	GO:0001933~negative regulation of protein phosphorylation,GO:0001942~hair follicle development,GO:0010839~negative regulation of keratinocyte proliferation,GO:0010951~negative regulation of endopeptidase activity,GO:0030512~negative regulation of transforming growth factor beta receptor signaling pathway,GO:0045616~regulation of keratinocyte differentiation,GO:0061045~negative regulation of wound…	GO:0005615~extracellular space,GO:0005886~plasma membrane,GO:0009986~cell surface,GO:0031225~anchored component of membrane,	GO:0004866~endopeptidase inhibitor activity,GO:0004867~serine-type endopeptidase inhibitor activity,GO:0050431~transforming growth factor beta binding,
D6RFL4	CD14	0.0446192	GO:0002755~MyD88-dependent toll-like receptor signaling pathway,GO:0002756~MyD88-independent toll-like receptor signaling pathway,GO:0006898~receptor-mediated endocytosis,GO:0006909~phagocytosis,GO:0006915~apoptotic process,GO:0006954~inflammatory response,GO:0007166~cell surface receptor signaling pathway,GO:0007249~I-kappaB kinase/NF-kappaB signaling,GO:0009408~response to heat,GO:0031663~lipop…	GO:0005576~extracellular region,GO:0005615~extracellular space,GO:0005794~Golgi apparatus,GO:0005886~plasma membrane,GO:0010008~endosome membrane,GO:0031362~anchored component of external side of plasma membrane,GO:0045121~membrane raft,GO:0046696~lipopolysaccharide receptor complex,GO:0070062~extracellular exosome,	GO:0001530~lipopolysaccharide binding,GO:0001847~opsonin receptor activity,GO:0005515~protein binding,GO:0016019~peptidoglycan receptor activity,GO:0070891~lipoteichoic acid binding,	hsa04010:MAPK signaling pathway,hsa04064:NF-kappa B signaling pathway,hsa04145:Phagosome,hsa04620:Toll-like receptor signaling pathway,hsa04640:Hematopoietic cell lineage,hsa05130:Pathogenic Escherichia coli infection,hsa05132:Salmonella infection,hsa05133:Pertussis,hsa05134:Legionellosis,hsa05146:Amoebiasis,hsa05152:Tuberculosis,hsa05202:Transcriptional misregulation in cancer,
O43866	CD5L	0.507007	GO:0002376~immune system process,GO:0006898~receptor-mediated endocytosis,GO:0006915~apoptotic process,GO:0006954~inflammatory response,GO:0006968~cellular defense response,	GO:0005576~extracellular region,GO:0005615~extracellular space,GO:0005737~cytoplasm,GO:0016020~membrane,GO:0070062~extracellular exosome,GO:0072562~blood microparticle,	GO:0005044~scavenger receptor activity,
A6NNI4	CD9	0.000826455	GO:0002576~platelet degranulation,GO:0006928~movement of cell or subcellular component,GO:0007155~cell adhesion,GO:0007166~cell surface receptor signaling pathway,GO:0007342~fusion of sperm to egg plasma membrane,GO:0007420~brain development,GO:0008285~negative regulation of cell proliferation,GO:0009414~response to water deprivation,GO:0014003~oligodendrocyte development,GO:0030168~platelet acti…	GO:0005615~extracellular space,GO:0005886~plasma membrane,GO:0005887~integral component of plasma membrane,GO:0005925~focal adhesion,GO:0009897~external side of plasma membrane,GO:0016020~membrane,GO:0016021~integral component of membrane,GO:0016324~apical plasma membrane,GO:0030666~endocytic vesicle membrane,GO:0030669~clathrin-coated endocytic vesicle membrane,GO:0031092~platelet alpha granule …	GO:0005178~integrin binding,GO:0005515~protein binding,	hsa04640:Hematopoietic cell lineage,
P12830	CDH1	0.706073	GO:0007156~homophilic cell adhesion via plasma membrane adhesion molecules,GO:0007416~synapse assembly,GO:0009636~response to toxic substance,GO:0010033~response to organic substance,GO:0016337~single organismal cell-cell adhesion,GO:0021983~pituitary gland development,GO:0022408~negative regulation of cell-cell adhesion,GO:0022617~extracellular matrix disassembly,GO:0030198~extracellular matrix …	GO:0005576~extracellular region,GO:0005737~cytoplasm,GO:0005768~endosome,GO:0005802~trans-Golgi network,GO:0005886~plasma membrane,GO:0005913~cell-cell adherens junction,GO:0005925~focal adhesion,GO:0009898~cytoplasmic side of plasma membrane,GO:0015629~actin cytoskeleton,GO:0016020~membrane,GO:0016021~integral component of membrane,GO:0016235~aggresome,GO:0016328~lateral plasma membrane,GO:00163…	GO:0001948~glycoprotein binding,GO:0005509~calcium ion binding,GO:0005515~protein binding,GO:0008013~beta-catenin binding,GO:0030506~ankyrin binding,GO:0032794~GTPase activating protein binding,GO:0045295~gamma-catenin binding,GO:0050839~cell adhesion molecule binding,GO:0098641~cadherin binding involved in cell-cell adhesion,	hsa04015:Rap1 signaling pathway,hsa04390:Hippo signaling pathway,hsa04514:Cell adhesion molecules (CAMs),hsa04520:Adherens junction,hsa05100:Bacterial invasion of epithelial cells,hsa05130:Pathogenic Escherichia coli infection,hsa05200:Pathways in cancer,hsa05213:Endometrial cancer,hsa05216:Thyroid cancer,hsa05218:Melanoma,hsa05219:Bladder cancer,
P55290	CDH13	0.00770597	GO:0000278~mitotic cell cycle,GO:0001938~positive regulation of endothelial cell proliferation,GO:0001954~positive regulation of cell-matrix adhesion,GO:0002040~sprouting angiogenesis,GO:0007155~cell adhesion,GO:0007156~homophilic cell adhesion via plasma membrane adhesion molecules,GO:0007162~negative regulation of cell adhesion,GO:0007266~Rho protein signal transduction,GO:0008285~negative regu…	GO:0005615~extracellular space,GO:0005737~cytoplasm,GO:0005886~plasma membrane,GO:0005901~caveola,GO:0005925~focal adhesion,GO:0009897~external side of plasma membrane,GO:0031225~anchored component of membrane,GO:0043005~neuron projection,GO:0048471~perinuclear region of cytoplasm,GO:0070062~extracellular exosome,	GO:0005509~calcium ion binding,GO:0030169~low-density lipoprotein particle binding,GO:0042803~protein homodimerization activity,GO:0045296~cadherin binding,GO:0055100~adiponectin binding,GO:0071813~lipoprotein particle binding,
P08603	CFH	0.00226786	GO:0006956~complement activation,GO:0006957~complement activation, alternative pathway,GO:0030449~regulation of complement activation,	GO:0005576~extracellular region,GO:0005615~extracellular space,GO:0070062~extracellular exosome,GO:0072562~blood microparticle,	GO:0005515~protein binding,GO:0008201~heparin binding,GO:0043395~heparan sulfate proteoglycan binding,	hsa04610:Complement and coagulation cascades,hsa05150:Staphylococcus aureus infection,
P23946	CMA1	0.000160946	GO:0002003~angiotensin maturation,GO:0006955~immune response,GO:0016485~protein processing,GO:0022617~extracellular matrix disassembly,GO:0030901~midbrain development,GO:0045766~positive regulation of angiogenesis,GO:0050720~interleukin-1 beta biosynthetic process,GO:0050727~regulation of inflammatory response,GO:0071333~cellular response to glucose stimulus,	GO:0005576~extracellular region,GO:0005737~cytoplasm,GO:0031012~extracellular matrix,GO:0043231~intracellular membrane-bounded organelle,	GO:0004175~endopeptidase activity,GO:0004252~serine-type endopeptidase activity,GO:0008236~serine-type peptidase activity,GO:0042277~peptide binding,	hsa04614:Renin-angiotensin system,
D6RGG3	COL12A1	0.013213	GO:0001501~skeletal system development,GO:0007155~cell adhesion,GO:0030199~collagen fibril organization,GO:0030574~collagen catabolic process,GO:0035987~endodermal cell differentiation,	GO:0005576~extracellular region,GO:0005581~collagen trimer,GO:0005595~collagen type XII trimer,GO:0005615~extracellular space,GO:0005788~endoplasmic reticulum lumen,GO:0031012~extracellular matrix,GO:0070062~extracellular exosome,GO:1903561~extracellular vesicle,	GO:0030020~extracellular matrix structural constituent conferring tensile strength,	hsa04974:Protein digestion and absorption,
Q05707	COL14A1	3.97793e-08	GO:0016337~single organismal cell-cell adhesion,GO:0030198~extracellular matrix organization,GO:0030199~collagen fibril organization,	GO:0005576~extracellular region,GO:0005578~proteinaceous extracellular matrix,GO:0005581~collagen trimer,GO:0005596~collagen type XIV trimer,GO:0005615~extracellular space,GO:0005788~endoplasmic reticulum lumen,GO:0031012~extracellular matrix,GO:0070062~extracellular exosome,	GO:0005201~extracellular matrix structural constituent,GO:0005518~collagen binding,GO:0030674~protein binding, bridging,GO:0044822~poly(A) RNA binding,	hsa04974:Protein digestion and absorption,
P02452	COL1A1	0.00248535	GO:0001501~skeletal system development,GO:0001568~blood vessel development,GO:0001649~osteoblast differentiation,GO:0001957~intramembranous ossification,GO:0001958~endochondral ossification,GO:0007155~cell adhesion,GO:0007596~blood coagulation,GO:0007601~visual perception,GO:0007605~sensory perception of sound,GO:0010718~positive regulation of epithelial to mesenchymal transition,GO:0010812~negat…	GO:0005576~extracellular region,GO:0005581~collagen trimer,GO:0005584~collagen type I trimer,GO:0005615~extracellular space,GO:0005788~endoplasmic reticulum lumen,GO:0005794~Golgi apparatus,GO:0016021~integral component of membrane,GO:0030141~secretory granule,GO:0031012~extracellular matrix,	GO:0005201~extracellular matrix structural constituent,GO:0005515~protein binding,GO:0042802~identical protein binding,GO:0046872~metal ion binding,GO:0048407~platelet-derived growth factor binding,	hsa04151:PI3K-Akt signaling pathway,hsa04510:Focal adhesion,hsa04512:ECM-receptor interaction,hsa04611:Platelet activation,hsa04974:Protein digestion and absorption,hsa05146:Amoebiasis,
A0A087WTA8	COL1A2	0.155681	GO:0001501~skeletal system development,GO:0001568~blood vessel development,GO:0007179~transforming growth factor beta receptor signaling pathway,GO:0007266~Rho protein signal transduction,GO:0007596~blood coagulation,GO:0008217~regulation of blood pressure,GO:0030168~platelet activation,GO:0030198~extracellular matrix organization,GO:0030199~collagen fibril organization,GO:0030574~collagen catabo…	GO:0005576~extracellular region,GO:0005578~proteinaceous extracellular matrix,GO:0005581~collagen trimer,GO:0005584~collagen type I trimer,GO:0005615~extracellular space,GO:0005788~endoplasmic reticulum lumen,GO:0031012~extracellular matrix,GO:0070062~extracellular exosome,	GO:0005201~extracellular matrix structural constituent,GO:0005515~protein binding,GO:0030674~protein binding, bridging,GO:0042802~identical protein binding,GO:0046332~SMAD binding,GO:0046872~metal ion binding,GO:0048407~platelet-derived growth factor binding,	hsa04151:PI3K-Akt signaling pathway,hsa04510:Focal adhesion,hsa04512:ECM-receptor interaction,hsa04611:Platelet activation,hsa04974:Protein digestion and absorption,hsa05146:Amoebiasis,
P08572	COL4A2	0.0685153	GO:0001525~angiogenesis,GO:0006351~transcription, DNA-templated,GO:0016525~negative regulation of angiogenesis,GO:0030198~extracellular matrix organization,GO:0030574~collagen catabolic process,GO:0035987~endodermal cell differentiation,GO:0038063~collagen-activated tyrosine kinase receptor signaling pathway,GO:0071560~cellular response to transforming growth factor beta stimulus,	GO:0005576~extracellular region,GO:0005587~collagen type IV trimer,GO:0005788~endoplasmic reticulum lumen,GO:0031012~extracellular matrix,GO:0043231~intracellular membrane-bounded organelle,GO:0070062~extracellular exosome,	GO:0005201~extracellular matrix structural constituent,GO:0005515~protein binding,	hsa04151:PI3K-Akt signaling pathway,hsa04510:Focal adhesion,hsa04512:ECM-receptor interaction,hsa04974:Protein digestion and absorption,hsa05146:Amoebiasis,hsa05200:Pathways in cancer,hsa05222:Small cell lung cancer,
A0A087X0S5	COL6A1	4.91836e-07	GO:0001649~osteoblast differentiation,GO:0007155~cell adhesion,GO:0030198~extracellular matrix organization,GO:0030574~collagen catabolic process,GO:0035987~endodermal cell differentiation,GO:0070208~protein heterotrimerization,GO:0071230~cellular response to amino acid stimulus,	GO:0005576~extracellular region,GO:0005581~collagen trimer,GO:0005589~collagen type VI trimer,GO:0005765~lysosomal membrane,GO:0005788~endoplasmic reticulum lumen,GO:0016020~membrane,GO:0031012~extracellular matrix,GO:0042383~sarcolemma,GO:0043234~protein complex,GO:0070062~extracellular exosome,	GO:0048407~platelet-derived growth factor binding,	hsa04151:PI3K-Akt signaling pathway,hsa04510:Focal adhesion,hsa04512:ECM-receptor interaction,hsa04974:Protein digestion and absorption,
P12110	COL6A2	1.31123e-06	GO:0007155~cell adhesion,GO:0009749~response to glucose,GO:0030198~extracellular matrix organization,GO:0030574~collagen catabolic process,GO:0070208~protein heterotrimerization,	GO:0005576~extracellular region,GO:0005578~proteinaceous extracellular matrix,GO:0005581~collagen trimer,GO:0005615~extracellular space,GO:0005788~endoplasmic reticulum lumen,GO:0031012~extracellular matrix,GO:0042383~sarcolemma,GO:0043234~protein complex,GO:0070062~extracellular exosome,GO:1903561~extracellular vesicle,	GO:0005515~protein binding,	hsa04151:PI3K-Akt signaling pathway,hsa04510:Focal adhesion,hsa04512:ECM-receptor interaction,hsa04974:Protein digestion and absorption,
P12111	COL6A3	1.96734e-05	GO:0007155~cell adhesion,GO:0007517~muscle organ development,GO:0010951~negative regulation of endopeptidase activity,GO:0030198~extracellular matrix organization,GO:0030574~collagen catabolic process,	GO:0005576~extracellular region,GO:0005578~proteinaceous extracellular matrix,GO:0005581~collagen trimer,GO:0005589~collagen type VI trimer,GO:0005615~extracellular space,GO:0005788~endoplasmic reticulum lumen,GO:0031012~extracellular matrix,GO:0042383~sarcolemma,GO:0070062~extracellular exosome,GO:1903561~extracellular vesicle,	GO:0004867~serine-type endopeptidase inhibitor activity,	hsa04151:PI3K-Akt signaling pathway,hsa04510:Focal adhesion,hsa04512:ECM-receptor interaction,hsa04974:Protein digestion and absorption,
P53621	COPA	4.74778e-05	GO:0006886~intracellular protein transport,GO:0006888~ER to Golgi vesicle-mediated transport,GO:0006890~retrograde vesicle-mediated transport, Golgi to ER,GO:0006891~intra-Golgi vesicle-mediated transport,GO:0030157~pancreatic juice secretion,	GO:0000139~Golgi membrane,GO:0005615~extracellular space,GO:0005737~cytoplasm,GO:0005789~endoplasmic reticulum membrane,GO:0005829~cytosol,GO:0016020~membrane,GO:0030126~COPI vesicle coat,GO:0030133~transport vesicle,GO:0070062~extracellular exosome,	GO:0005179~hormone activity,GO:0005198~structural molecule activity,
P00450	CP	0.594145	GO:0006825~copper ion transport,GO:0006879~cellular iron ion homeostasis,GO:0055114~oxidation-reduction process,	GO:0005576~extracellular region,GO:0005615~extracellular space,GO:0005623~cell,GO:0005765~lysosomal membrane,GO:0070062~extracellular exosome,GO:0072562~blood microparticle,	GO:0004322~ferroxidase activity,GO:0005507~copper ion binding,GO:0051087~chaperone binding,	hsa00860:Porphyrin and chlorophyll metabolism,
P15088	CPA3	0.000367352	GO:0002003~angiotensin maturation,GO:0006508~proteolysis,	GO:0005576~extracellular region,GO:0005615~extracellular space,GO:0030133~transport vesicle,GO:0030141~secretory granule,	GO:0004181~metallocarboxypeptidase activity,GO:0008270~zinc ion binding,	hsa04614:Renin-angiotensin system,hsa04972:Pancreatic secretion,hsa04974:Protein digestion and absorption,
A0A087WSY5	CPB2	0.0275055	GO:0003331~positive regulation of extracellular matrix constituent secretion,GO:0006508~proteolysis,GO:0007596~blood coagulation,GO:0009408~response to heat,GO:0010757~negative regulation of plasminogen activation,GO:0042493~response to drug,GO:0042730~fibrinolysis,GO:0051918~negative regulation of fibrinolysis,GO:0071333~cellular response to glucose stimulus,GO:0097421~liver regeneration,GO:2000…	GO:0005615~extracellular space,GO:0005623~cell,GO:0070062~extracellular exosome,	GO:0004181~metallocarboxypeptidase activity,GO:0008270~zinc ion binding,	hsa04610:Complement and coagulation cascades,hsa04972:Pancreatic secretion,hsa04974:Protein digestion and absorption,
Q9Y646	CPQ	0.00252186	GO:0006508~proteolysis,GO:0006590~thyroid hormone generation,GO:0042246~tissue regeneration,GO:0043171~peptide catabolic process,	GO:0005615~extracellular space,GO:0005737~cytoplasm,GO:0005764~lysosome,GO:0005783~endoplasmic reticulum,GO:0005794~Golgi apparatus,GO:0070062~extracellular exosome,	GO:0004180~carboxypeptidase activity,GO:0042803~protein homodimerization activity,GO:0046872~metal ion binding,GO:0070573~metallodipeptidase activity,
Q96SM3	CPXM1	0.179112	GO:0006518~peptide metabolic process,GO:0016485~protein processing,	GO:0005615~extracellular space,	GO:0004180~carboxypeptidase activity,GO:0004181~metallocarboxypeptidase activity,GO:0004185~serine-type carboxypeptidase activity,GO:0008237~metallopeptidase activity,GO:0008270~zinc ion binding,
Q6UXH1	CRELD2	0.00140202		GO:0005615~extracellular space,GO:0005783~endoplasmic reticulum,GO:0005794~Golgi apparatus,	GO:0005509~calcium ion binding,GO:0005515~protein binding,
P52943	CRIP2	0.000133676	GO:0008284~positive regulation of cell proliferation,GO:0030097~hemopoiesis,	GO:0005938~cell cortex,GO:0031012~extracellular matrix,	GO:0008270~zinc ion binding,
P01034	CST3	1.87741e-05	GO:0001654~eye development,GO:0001666~response to hypoxia,GO:0001775~cell activation,GO:0006915~apoptotic process,GO:0006952~defense response,GO:0007420~brain development,GO:0007431~salivary gland development,GO:0007566~embryo implantation,GO:0008284~positive regulation of cell proliferation,GO:0009636~response to toxic substance,GO:0009743~response to carbohydrate,GO:0010466~negative regulation …	GO:0005576~extracellular region,GO:0005604~basement membrane,GO:0005615~extracellular space,GO:0005764~lysosome,GO:0005771~multivesicular body,GO:0005783~endoplasmic reticulum,GO:0030424~axon,GO:0031965~nuclear membrane,GO:0031982~vesicle,GO:0043025~neuronal cell body,GO:0043292~contractile fiber,GO:0048471~perinuclear region of cytoplasm,GO:0070062~extracellular exosome,	GO:0001540~beta-amyloid binding,GO:0002020~protease binding,GO:0004866~endopeptidase inhibitor activity,GO:0004869~cysteine-type endopeptidase inhibitor activity,GO:0005515~protein binding,GO:0042802~identical protein binding,	hsa04970:Salivary secretion,
P53634	CTSC	0.000113341	GO:0001913~T cell mediated cytotoxicity,GO:0006508~proteolysis,GO:0006888~ER to Golgi vesicle-mediated transport,GO:0006915~apoptotic process,GO:0006955~immune response,GO:0007568~aging,GO:0010033~response to organic substance,GO:0048208~COPII vesicle coating,GO:0051603~proteolysis involved in cellular protein catabolic process,GO:1903052~positive regulation of proteolysis involved in cellular pr…	GO:0000139~Golgi membrane,GO:0005615~extracellular space,GO:0005764~lysosome,GO:0005788~endoplasmic reticulum lumen,GO:0016020~membrane,GO:0030134~ER to Golgi transport vesicle,GO:0033116~endoplasmic reticulum-Golgi intermediate compartment membrane,GO:0070062~extracellular exosome,	GO:0004197~cysteine-type endopeptidase activity,GO:0004252~serine-type endopeptidase activity,GO:0005515~protein binding,GO:0008234~cysteine-type peptidase activity,GO:0016505~peptidase activator activity involved in apoptotic process,GO:0016787~hydrolase activity,GO:0019902~phosphatase binding,GO:0031404~chloride ion binding,GO:0042802~identical protein binding,GO:0043621~protein self-associatio…	hsa04142:Lysosome,
A0A1B0GW44	CTSD	3.39828e-05	GO:0006508~proteolysis,GO:0006914~autophagy,GO:0019886~antigen processing and presentation of exogenous peptide antigen via MHC class II,GO:0030163~protein catabolic process,GO:0030574~collagen catabolic process,	GO:0005576~extracellular region,GO:0005615~extracellular space,GO:0005764~lysosome,GO:0031012~extracellular matrix,GO:0042470~melanosome,GO:0043202~lysosomal lumen,GO:0045121~membrane raft,GO:0070062~extracellular exosome,	GO:0004190~aspartic-type endopeptidase activity,GO:0004197~cysteine-type endopeptidase activity,GO:0004252~serine-type endopeptidase activity,GO:0005515~protein binding,	hsa04071:Sphingolipid signaling pathway,hsa04142:Lysosome,hsa05152:Tuberculosis,
A0A087X0D5	CTSH	0.000420901	GO:0001656~metanephros development,GO:0001913~T cell mediated cytotoxicity,GO:0002250~adaptive immune response,GO:0002764~immune response-regulating signaling pathway,GO:0006508~proteolysis,GO:0006915~apoptotic process,GO:0006919~activation of cysteine-type endopeptidase activity involved in apoptotic process,GO:0008284~positive regulation of cell proliferation,GO:0010628~positive regulation of g…	GO:0005615~extracellular space,GO:0005764~lysosome,GO:0005829~cytosol,GO:0070062~extracellular exosome,GO:0097208~alveolar lamellar body,GO:0097486~multivesicular body lumen,	GO:0004175~endopeptidase activity,GO:0004177~aminopeptidase activity,GO:0004197~cysteine-type endopeptidase activity,GO:0004252~serine-type endopeptidase activity,GO:0005515~protein binding,GO:0008233~peptidase activity,GO:0008234~cysteine-type peptidase activity,GO:0008656~cysteine-type endopeptidase activator activity involved in apoptotic process,GO:0030108~HLA-A specific activating MHC class …	hsa04142:Lysosome,
P25774	CTSS	0.00885618	GO:0002224~toll-like receptor signaling pathway,GO:0002250~adaptive immune response,GO:0006508~proteolysis,GO:0006955~immune response,GO:0010447~response to acidic pH,GO:0016485~protein processing,GO:0019882~antigen processing and presentation,GO:0019886~antigen processing and presentation of exogenous peptide antigen via MHC class II,GO:0022617~extracellular matrix disassembly,GO:0030574~collage…	GO:0005576~extracellular region,GO:0005615~extracellular space,GO:0005764~lysosome,GO:0036021~endolysosome lumen,GO:0043202~lysosomal lumen,GO:0043231~intracellular membrane-bounded organelle,	GO:0001968~fibronectin binding,GO:0004197~cysteine-type endopeptidase activity,GO:0004252~serine-type endopeptidase activity,GO:0005518~collagen binding,GO:0008234~cysteine-type peptidase activity,GO:0043236~laminin binding,GO:0043394~proteoglycan binding,	hsa04142:Lysosome,hsa04145:Phagosome,hsa04612:Antigen processing and presentation,hsa05152:Tuberculosis,
Q9UBR2	CTSZ	0.0456585	GO:0002003~angiotensin maturation,GO:0006508~proteolysis,GO:0006888~ER to Golgi vesicle-mediated transport,GO:0048208~COPII vesicle coating,GO:0051603~proteolysis involved in cellular protein catabolic process,GO:0060441~epithelial tube branching involved in lung morphogenesis,	GO:0000139~Golgi membrane,GO:0005615~extracellular space,GO:0005764~lysosome,GO:0005783~endoplasmic reticulum,GO:0005788~endoplasmic reticulum lumen,GO:0005886~plasma membrane,GO:0030134~ER to Golgi transport vesicle,GO:0033116~endoplasmic reticulum-Golgi intermediate compartment membrane,GO:0043231~intracellular membrane-bounded organelle,GO:0070062~extracellular exosome,	GO:0004197~cysteine-type endopeptidase activity,GO:0005515~protein binding,GO:0008234~cysteine-type peptidase activity,	hsa04142:Lysosome,
P07585	DCN	7.04424e-05	GO:0001822~kidney development,GO:0001890~placenta development,GO:0006469~negative regulation of protein kinase activity,GO:0007519~skeletal muscle tissue development,GO:0007568~aging,GO:0009612~response to mechanical stimulus,GO:0009887~organ morphogenesis,GO:0010508~positive regulation of autophagy,GO:0010596~negative regulation of endothelial cell migration,GO:0014068~positive regulation of pho…	GO:0005576~extracellular region,GO:0005589~collagen type VI trimer,GO:0005615~extracellular space,GO:0005737~cytoplasm,GO:0005796~Golgi lumen,GO:0031012~extracellular matrix,GO:0043202~lysosomal lumen,	GO:0004860~protein kinase inhibitor activity,GO:0005515~protein binding,GO:0005518~collagen binding,GO:0005539~glycosaminoglycan binding,GO:0044822~poly(A) RNA binding,GO:0047485~protein N-terminus binding,GO:0050840~extracellular matrix binding,	hsa04350:TGF-beta signaling pathway,hsa05205:Proteoglycans in cancer,
P59666	DEFA3	0.00241156	GO:0002227~innate immune response in mucosa,GO:0019731~antibacterial humoral response,GO:0030520~intracellular estrogen receptor signaling pathway,GO:0031640~killing of cells of other organism,GO:0042742~defense response to bacterium,GO:0045087~innate immune response,GO:0050830~defense response to Gram-positive bacterium,GO:0050832~defense response to fungus,GO:0051607~defense response to virus,	GO:0005576~extracellular region,GO:0005615~extracellular space,GO:0005796~Golgi lumen,GO:0035578~azurophil granule lumen,GO:0070062~extracellular exosome,
A0A590UJZ9	DMBT1	7.65944e-05	GO:0002221~pattern recognition receptor signaling pathway,GO:0006898~receptor-mediated endocytosis,GO:0007275~multicellular organism development,GO:0015031~protein transport,GO:0030855~epithelial cell differentiation,GO:0043152~induction of bacterial agglutination,GO:0044267~cellular protein metabolic process,GO:0045087~innate immune response,GO:0051607~defense response to virus,	GO:0005576~extracellular region,GO:0005615~extracellular space,GO:0005737~cytoplasm,GO:0016020~membrane,GO:0019898~extrinsic component of membrane,GO:0030670~phagocytic vesicle membrane,GO:0042589~zymogen granule membrane,GO:0070062~extracellular exosome,	GO:0005044~scavenger receptor activity,GO:0005515~protein binding,GO:0008329~signaling pattern recognition receptor activity,GO:0035375~zymogen binding,GO:0048306~calcium-dependent protein binding,	hsa04970:Salivary secretion,
Q07507	DPT	1.45998e-05	GO:0007155~cell adhesion,GO:0008285~negative regulation of cell proliferation,GO:0030199~collagen fibril organization,	GO:0005578~proteinaceous extracellular matrix,GO:0005615~extracellular space,GO:0031012~extracellular matrix,GO:0070062~extracellular exosome,
[truncated: 2,654 more rows]
